# Supplementary material
Source: publisher figshare collection journal article supplement (https://acs.figshare.com/ndownloader/files/3820243)
Supplement: Supplementary file 1 [file 3820243]

#\#CIF_1.1
 
#  CIF produced by WinGX routine CIF_UPDATE
#  Created on 2012-11-25 at 16:36:24
#  Using CIFtbx version 2.6.2 16 Jun 1998
 
#  Dictionary name : cif_core.dic
#  Dictionary vers : 2.3
#  Request file    : e:\xprogs\wingx\files\archive.dat
#  CIF files read  : 3 struct
 
 
data_3
 
_audit_creation_date                    2012-11-25T16:36:24-00:00
_audit_creation_method                  'WinGX routine CIF_UPDATE'
_audit_conform_dict_name                cif_core.dic
_audit_conform_dict_version             2.3
_audit_conform_dict_location            ftp://ftp.iucr.org/pub/cif_core.dic
_publ_requested_category                FM
 
#----------------------------------------------------------------------------#
#                   CHEMICAL INFORMATION                                     #
#----------------------------------------------------------------------------#
 
_chemical_name_systematic
;
 ?
;
_chemical_formula_moiety                'C16 H12 Cs1 Mn1 N2 O4,( H2 O )'
_chemical_formula_sum                   'C16 H14 Cs Mn N2 O5'
_chemical_formula_weight                502.14
_chemical_compound_source               'synthesis as described'
 
#----------------------------------------------------------------------------#
#                   UNIT CELL INFORMATION                                    #
#----------------------------------------------------------------------------#
 
_symmetry_cell_setting                  monoclinic
_symmetry_space_group_name_H-M          'P 21/c'
_symmetry_space_group_name_Hall         '-P 2ybc'
_symmetry_Int_Tables_number             14
loop_
    _symmetry_equiv_pos_as_xyz
'x, y, z'
'-x, y+1/2, -z+1/2'
'-x, -y, -z'
'x, -y-1/2, z-1/2'
 
_cell_length_a                          10.839(2)
_cell_length_b                          15.437(3)
_cell_length_c                          9.3724(19)
_cell_angle_alpha                       90
_cell_angle_beta                        92.052(4)
_cell_angle_gamma                       90
_cell_volume                            1567.2(5)
_cell_formula_units_Z                   4
_cell_measurement_temperature           120(2)
_cell_measurement_reflns_used           1177
_cell_measurement_theta_min             3.21
_cell_measurement_theta_max             25.77
_cell_measurement_wavelength            0.71073
 
#----------------------------------------------------------------------------#
#                   CRYSTAL INFORMATION                                      #
#----------------------------------------------------------------------------#
 
_exptl_crystal_description              prism
_exptl_crystal_colour                   Brown
_exptl_crystal_size_max                 0.21
_exptl_crystal_size_mid                 0.07
_exptl_crystal_size_min                 0.06
_exptl_crystal_density_diffrn           2.128
_exptl_crystal_density_method           'not measured'
_exptl_crystal_F_000                    976
_exptl_special_details
;
 ?
;
 
#----------------------------------------------------------------------------#
#                   ABSORPTION CORRECTION                                    #
#----------------------------------------------------------------------------#
 
_exptl_absorpt_coefficient_mu           3.163
_exptl_absorpt_correction_type          multi-scan
_exptl_absorpt_process_details          'BRUKER SADABS'
_exptl_absorpt_correction_T_min         0.59584
_exptl_absorpt_correction_T_max         0.83
#----------------------------------------------------------------------------#
#                   DATA COLLECTION                                          #
#----------------------------------------------------------------------------#
 
_diffrn_ambient_temperature             120(2)
_diffrn_radiation_wavelength            0.7107
_diffrn_radiation_type                  MoK\a
_diffrn_radiation_probe                 x-ray
_diffrn_radiation_source               'fine-focus sealed tube'
_diffrn_radiation_monochromador         graphite
_diffrn_measurement_device_type        'Smart-CCD-1000 BRUKER'
_diffrn_measurement_method             'omega scans'
_diffrn_reflns_av_R_equivalents         0.0882
_diffrn_reflns_av_unetI/netI            0.0588
_diffrn_reflns_number                   28977
_diffrn_reflns_limit_h_min              -14
_diffrn_reflns_limit_h_max              14
_diffrn_reflns_limit_k_min              0
_diffrn_reflns_limit_k_max              20
_diffrn_reflns_limit_l_min              0
_diffrn_reflns_limit_l_max              12
_diffrn_reflns_theta_min                1.88
_diffrn_reflns_theta_max                27.88
_diffrn_reflns_theta_full               27.88
_diffrn_measured_fraction_theta_full
                                        0.999
_diffrn_measured_fraction_theta_max
                                        0.999
_reflns_number_total                    3736
_reflns_number_gt                       2657
_reflns_threshold_expression            >2sigma(I)
 
#----------------------------------------------------------------------------#
#                   COMPUTER PROGRAMS USED                                   #
#----------------------------------------------------------------------------#
 
_computing_data_collection              'BRUKER SMART'
_computing_cell_refinement              'BRUKER SMART'
_computing_data_reduction               'BRUKER SAINT'
_computing_structure_solution           'DIRDIF96 ( Beurskens, 1996)'
_computing_structure_refinement         'SHELXL-97 (Sheldrick, 1997)'
_computing_molecular_graphics           'Ortep-3 for Windows (Farrugia, 1997)'
_computing_publication_material
                                   'WinGX publication routines (Farrugia, 1999)'
 
#----------------------------------------------------------------------------#
#                   REFINEMENT INFORMATION                                   #
#----------------------------------------------------------------------------#
 
_refine_special_details
;
 Refinement of F^2^ against ALL reflections.  The weighted R-factor wR and
 goodness of fit S are based on F^2^, conventional R-factors R are based
 on F, with F set to zero for negative F^2^. The threshold expression of
 F^2^ > 2sigma(F^2^) is used only for calculating R-factors(gt) etc. and is
 not relevant to the choice of reflections for refinement.  R-factors based
 on F^2^ are statistically about twice as large as those based on F, and R-
 factors based on ALL data will be even larger.
;
_refine_ls_structure_factor_coef        Fsqd
_refine_ls_matrix_type                  full
_refine_ls_weighting_scheme             calc
_refine_ls_weighting_details
         'calc w=1/[\s^2^(Fo^2^)+(0.0280P)^2^+0.4795P] where P=(Fo^2^+2Fc^2^)/3'
_atom_sites_solution_primary            direct
_atom_sites_solution_secondary          difmap
_atom_sites_solution_hydrogens          geom
_refine_ls_hydrogen_treatment           mixed
_refine_ls_extinction_method            none
_refine_ls_number_reflns                3736
_refine_ls_number_parameters            232
_refine_ls_number_restraints            0
_refine_ls_R_factor_all                 0.0618
_refine_ls_R_factor_gt                  0.0374
_refine_ls_wR_factor_ref                0.0749
_refine_ls_wR_factor_gt                 0.0699
_refine_ls_goodness_of_fit_ref          1.098
_refine_ls_restrained_S_all             1.098
_refine_ls_shift/su_max                 0.002
_refine_ls_shift/su_mean                0
_refine_diff_density_max                1.078
_refine_diff_density_min                -0.897
_refine_diff_density_rms                0.175
 
#----------------------------------------------------------------------------#
#                   ATOMIC TYPES, COORDINATES AND THERMAL PARAMETERS         #
#----------------------------------------------------------------------------#
 
loop_
    _atom_type_symbol
    _atom_type_description
    _atom_type_scat_dispersion_real
    _atom_type_scat_dispersion_imag
    _atom_type_scat_source
C C 0.0033 0.0016 'International Tables Vol C Tables 4.2.6.8 and 6.1.1.4'
H H 0 0 'International Tables Vol C Tables 4.2.6.8 and 6.1.1.4'
Cs Cs -0.368 2.1192 'International Tables Vol C Tables 4.2.6.8 and 6.1.1.4'
Mn Mn 0.3368 0.7283 'International Tables Vol C Tables 4.2.6.8 and 6.1.1.4'
N N 0.0061 0.0033 'International Tables Vol C Tables 4.2.6.8 and 6.1.1.4'
O O 0.0106 0.006 'International Tables Vol C Tables 4.2.6.8 and 6.1.1.4'
 
loop_
    _atom_site_label
    _atom_site_type_symbol
    _atom_site_fract_x
    _atom_site_fract_y
    _atom_site_fract_z
    _atom_site_U_iso_or_equiv
    _atom_site_adp_type
    _atom_site_occupancy
    _atom_site_symmetry_multiplicity
    _atom_site_calc_flag
    _atom_site_refinement_flags
    _atom_site_disorder_assembly
    _atom_site_disorder_group
Cs1 Cs 1.13530(2) 0.121200(18) 0.44914(3) 0.01427(8) Uani 1 1 d . . .
Mn2 Mn 0.76338(6) 0.13750(4) 0.54888(7) 0.00899(15) Uani 1 1 d . . .
N1 N 0.7899(3) 0.2292(2) 0.6899(4) 0.0095(7) Uani 1 1 d . . .
C2 C 0.7125(4) 0.3035(3) 0.6498(5) 0.0116(9) Uani 1 1 d . . .
H2A H 0.7471 0.3341 0.5702 0.014 Uiso 1 1 calc R . .
H2B H 0.7074 0.3432 0.7295 0.014 Uiso 1 1 calc R . .
C3 C 0.5864(4) 0.2689(3) 0.6084(5) 0.0125(9) Uani 1 1 d . . .
H3A H 0.543 0.2525 0.693 0.015 Uiso 1 1 calc R . .
H3B H 0.5384 0.3129 0.5577 0.015 Uiso 1 1 calc R . .
N4 N 0.6025(3) 0.1926(2) 0.5158(4) 0.0098(8) Uani 1 1 d . . .
C11 C 0.8637(4) 0.2335(3) 0.8056(4) 0.0104(9) Uani 1 1 d . . .
C12 C 0.9478(4) 0.1600(3) 0.8399(4) 0.0102(9) Uani 1 1 d . . .
C13 C 0.9660(4) 0.0892(3) 0.7463(4) 0.0102(9) Uani 1 1 d . . .
C14 C 1.0595(4) 0.0288(3) 0.7821(5) 0.0124(9) Uani 1 1 d . . .
H14 H 1.0738 -0.0171 0.7207 0.015 Uiso 1 1 calc R . .
C15 C 1.1299(4) 0.0367(3) 0.9066(5) 0.0169(10) Uani 1 1 d . . .
H15 H 1.1917 -0.0036 0.9277 0.02 Uiso 1 1 calc R . .
C16 C 1.1100(4) 0.1037(3) 1.0006(5) 0.0168(10) Uani 1 1 d . . .
H16 H 1.1574 0.1085 1.0849 0.02 Uiso 1 1 calc R . .
C17 C 1.0186(4) 0.1637(3) 0.9676(5) 0.0126(9) Uani 1 1 d . . .
H17 H 1.0037 0.2078 1.0323 0.015 Uiso 1 1 calc R . .
O111 O 0.8692(3) 0.29976(18) 0.8869(3) 0.0121(7) Uani 1 1 d . . .
O131 O 0.9021(3) 0.07629(18) 0.6236(3) 0.0101(6) Uani 1 1 d . . .
C41 C 0.5022(4) 0.1632(3) 0.4445(4) 0.0111(9) Uani 1 1 d . . .
C42 C 0.5102(4) 0.0831(3) 0.3572(4) 0.0107(9) Uani 1 1 d . . .
C43 C 0.6113(4) 0.0265(3) 0.3652(5) 0.0113(9) Uani 1 1 d . . .
C44 C 0.6072(4) -0.0489(3) 0.2828(4) 0.0134(9) Uani 1 1 d . . .
H44 H 0.6744 -0.0863 0.2867 0.016 Uiso 1 1 calc R . .
C45 C 0.5063(4) -0.0691(3) 0.1963(5) 0.0170(10) Uani 1 1 d . . .
H45 H 0.5044 -0.1206 0.1447 0.02 Uiso 1 1 calc R . .
C46 C 0.4066(4) -0.0117(3) 0.1863(5) 0.0180(10) Uani 1 1 d . . .
H46 H 0.3387 -0.0237 0.1261 0.022 Uiso 1 1 calc R . .
C47 C 0.4103(4) 0.0621(3) 0.2659(5) 0.0143(10) Uani 1 1 d . . .
H47 H 0.3436 0.0999 0.2591 0.017 Uiso 1 1 calc R . .
O411 O 0.3988(3) 0.20330(19) 0.4473(3) 0.0123(7) Uani 1 1 d . . .
O431 O 0.7143(3) 0.03939(18) 0.4460(3) 0.0128(7) Uani 1 1 d . . .
O1 O 0.2601(3) 0.2540(2) 0.1943(4) 0.0206(8) Uani 1 1 d . . .
H1A H 0.303(5) 0.258(3) 0.131(6) 0.025 Uiso 1 1 d . . .
H1B H 0.293(5) 0.251(3) 0.266(5) 0.025 Uiso 1 1 d . . .
 
loop_
    _atom_site_aniso_label
    _atom_site_aniso_U_11
    _atom_site_aniso_U_22
    _atom_site_aniso_U_33
    _atom_site_aniso_U_23
    _atom_site_aniso_U_13
    _atom_site_aniso_U_12
Cs1 0.01069(13) 0.01348(14) 0.01862(15) 0.00041(12) 0.00007(10) 0.00012(12)
Mn2 0.0082(3) 0.0093(4) 0.0093(3) -0.0009(2) -0.0017(2) 0.0011(2)
N1 0.0094(18) 0.0095(18) 0.0095(19) 0.0014(14) -0.0018(15) 0.0018(14)
C2 0.013(2) 0.010(2) 0.011(2) 0.0015(17) -0.0028(18) 0.0027(17)
C3 0.013(2) 0.014(2) 0.011(2) -0.0030(17) -0.0003(18) 0.0021(18)
N4 0.0087(18) 0.0101(19) 0.0107(19) 0.0004(14) 0.0004(15) 0.0024(14)
C11 0.008(2) 0.011(2) 0.012(2) -0.0027(18) 0.0072(17) -0.0039(17)
C12 0.009(2) 0.012(2) 0.010(2) 0.0009(17) 0.0005(17) -0.0040(17)
C13 0.011(2) 0.012(2) 0.008(2) 0.0041(16) 0.0002(16) -0.0014(17)
C14 0.013(2) 0.009(2) 0.015(2) 0.0020(18) -0.0026(18) -0.0015(17)
C15 0.011(2) 0.014(2) 0.025(3) 0.0068(19) -0.007(2) 0.0031(18)
C16 0.015(2) 0.021(3) 0.014(2) 0.0091(19) -0.0052(18) -0.0044(19)
C17 0.013(2) 0.010(2) 0.015(2) -0.0032(18) 0.0015(18) -0.0030(18)
O111 0.0132(16) 0.0135(16) 0.0095(16) -0.0036(12) 0.0006(12) 0.0006(12)
O131 0.0089(15) 0.0123(16) 0.0087(15) -0.0021(12) -0.0032(12) 0.0010(12)
C41 0.010(2) 0.014(2) 0.009(2) 0.0008(17) 0.0005(18) -0.0010(17)
C42 0.013(2) 0.009(2) 0.010(2) 0.0030(17) 0.0015(17) -0.0014(17)
C43 0.010(2) 0.012(2) 0.012(2) 0.0053(17) 0.0009(17) -0.0032(17)
C44 0.016(2) 0.012(2) 0.012(2) -0.0015(17) -0.0012(18) 0.0032(18)
C45 0.025(3) 0.012(2) 0.014(2) -0.0030(18) -0.002(2) -0.005(2)
C46 0.019(2) 0.019(3) 0.014(2) -0.0031(19) -0.0100(19) -0.002(2)
C47 0.011(2) 0.017(2) 0.014(2) 0.0026(18) -0.0021(19) 0.0028(18)
O411 0.0079(15) 0.0185(17) 0.0106(16) -0.0007(13) 0.0009(12) -0.0004(12)
O431 0.0104(15) 0.0114(16) 0.0163(17) -0.0020(13) -0.0058(13) 0.0019(12)
O1 0.020(2) 0.0210(19) 0.021(2) 0.0022(16) 0.0016(15) -0.0027(15)
 
 
#----------------------------------------------------------------------------#
#                   MOLECULAR GEOMETRY                                       #
#----------------------------------------------------------------------------#
 
_geom_special_details
;
 All esds (except the esd in the dihedral angle between two l.s. planes)
 are estimated using the full covariance matrix.  The cell esds are taken
 into account individually in the estimation of esds in distances, angles
 and torsion angles; correlations between esds in cell parameters are only
 used when they are defined by crystal symmetry.  An approximate (isotropic)
 treatment of cell esds is used for estimating esds involving l.s. planes.
;
loop_
    _geom_bond_atom_site_label_1
    _geom_bond_atom_site_label_2
    _geom_bond_distance
    _geom_bond_site_symmetry_2
    _geom_bond_publ_flag
Cs1 O431 3.107(3) 3_756 ?
Cs1 O411 3.125(3) 1_655 ?
Cs1 O131 3.137(3) . ?
Cs1 O131 3.147(3) 3_756 ?
Cs1 O111 3.167(3) 4_565 ?
Cs1 O1 3.255(4) 4_666 ?
Cs1 C13 3.426(4) . ?
Cs1 O1 3.460(4) 1_655 ?
Cs1 C14 3.555(4) . ?
Cs1 C17 3.560(4) 4_565 ?
Cs1 C47 3.610(4) 1_655 ?
Cs1 C14 3.767(4) 3_756 ?
Mn2 O431 1.863(3) . ?
Mn2 O131 1.889(3) . ?
Mn2 N1 1.951(3) . ?
Mn2 N4 1.955(3) . ?
Mn2 O111 2.164(3) 4_565 ?
Mn2 Cs1 4.1417(10) 3_756 ?
N1 C11 1.326(5) . ?
N1 C2 1.461(5) . ?
C2 C3 1.506(6) . ?
C2 H2A 0.97 . ?
C2 H2B 0.97 . ?
C3 N4 1.477(5) . ?
C3 H3A 0.97 . ?
C3 H3B 0.97 . ?
N4 C41 1.334(5) . ?
C11 O111 1.276(5) . ?
C11 C12 1.483(6) . ?
C11 Cs1 3.902(4) 4_566 ?
C12 C17 1.400(6) . ?
C12 C13 1.420(6) . ?
C13 O131 1.336(5) . ?
C13 C14 1.409(6) . ?
C13 Cs1 3.868(4) 3_756 ?
C14 C15 1.377(6) . ?
C14 Cs1 3.767(4) 3_756 ?
C14 H14 0.93 . ?
C15 C16 1.381(6) . ?
C15 H15 0.93 . ?
C16 C17 1.383(6) . ?
C16 H16 0.93 . ?
C17 Cs1 3.560(4) 4_566 ?
C17 H17 0.93 . ?
O111 Mn2 2.164(3) 4_566 ?
O111 Cs1 3.167(3) 4_566 ?
O131 Cs1 3.147(3) 3_756 ?
C41 O411 1.282(5) . ?
C41 C42 1.488(6) . ?
C42 C47 1.393(6) . ?
C42 C43 1.401(6) . ?
C43 O431 1.341(5) . ?
C43 C44 1.396(6) . ?
C44 C45 1.374(6) . ?
C44 Cs1 3.853(4) 3_756 ?
C44 H44 0.93 . ?
C45 C46 1.398(6) . ?
C45 H45 0.93 . ?
C46 C47 1.362(6) . ?
C46 H46 0.93 . ?
C47 Cs1 3.610(4) 1_455 ?
C47 H47 0.93 . ?
O411 Cs1 3.125(3) 1_455 ?
O431 Cs1 3.107(3) 3_756 ?
O1 Cs1 3.255(4) 4_465 ?
O1 Cs1 3.460(4) 1_455 ?
O1 H1A 0.77(5) . ?
O1 H1B 0.75(5) . ?
 
loop_
    _geom_angle_atom_site_label_1
    _geom_angle_atom_site_label_2
    _geom_angle_atom_site_label_3
    _geom_angle
    _geom_angle_site_symmetry_1
    _geom_angle_site_symmetry_3
    _geom_angle_publ_flag
O431 Cs1 O411 81.72(8) 3_756 1_655 ?
O431 Cs1 O131 94.72(8) 3_756 . ?
O411 Cs1 O131 147.80(7) 1_655 . ?
O431 Cs1 O131 50.04(7) 3_756 3_756 ?
O411 Cs1 O131 120.15(7) 1_655 3_756 ?
O131 Cs1 O131 78.41(8) . 3_756 ?
O431 Cs1 O111 146.08(7) 3_756 4_565 ?
O411 Cs1 O111 132.01(8) 1_655 4_565 ?
O131 Cs1 O111 55.63(7) . 4_565 ?
O131 Cs1 O111 102.94(7) 3_756 4_565 ?
O431 Cs1 O1 92.79(8) 3_756 4_666 ?
O411 Cs1 O1 53.64(8) 1_655 4_666 ?
O131 Cs1 O1 94.89(8) . 4_666 ?
O131 Cs1 O1 140.65(8) 3_756 4_666 ?
O111 Cs1 O1 104.76(8) 4_565 4_666 ?
O431 Cs1 C13 85.30(9) 3_756 . ?
O411 Cs1 C13 125.41(9) 1_655 . ?
O131 Cs1 C13 22.94(8) . . ?
O131 Cs1 C13 88.16(9) 3_756 . ?
O111 Cs1 C13 72.20(9) 4_565 . ?
O1 Cs1 C13 74.51(10) 4_666 . ?
O431 Cs1 O1 118.51(8) 3_756 1_655 ?
O411 Cs1 O1 51.37(8) 1_655 1_655 ?
O131 Cs1 O1 146.43(8) . 1_655 ?
O131 Cs1 O1 118.35(8) 3_756 1_655 ?
O111 Cs1 O1 91.19(8) 4_565 1_655 ?
O1 Cs1 O1 88.49(5) 4_666 1_655 ?
C13 Cs1 O1 151.76(9) . 1_655 ?
O431 Cs1 C14 62.44(9) 3_756 . ?
O411 Cs1 C14 114.07(8) 1_655 . ?
O131 Cs1 C14 40.32(8) . . ?
O131 Cs1 C14 76.68(9) 3_756 . ?
O111 Cs1 C14 94.50(8) 4_565 . ?
O1 Cs1 C14 73.81(10) 4_666 . ?
C13 Cs1 C14 23.19(9) . . ?
O1 Cs1 C14 162.25(9) 1_655 . ?
O431 Cs1 C17 155.81(9) 3_756 4_565 ?
O411 Cs1 C17 87.05(9) 1_655 4_565 ?
O131 Cs1 C17 83.48(9) . 4_565 ?
O131 Cs1 C17 150.57(9) 3_756 4_565 ?
O111 Cs1 C17 47.67(9) 4_565 4_565 ?
O1 Cs1 C17 63.46(9) 4_666 4_565 ?
C13 Cs1 C17 83.88(10) . 4_565 ?
O1 Cs1 C17 68.24(9) 1_655 4_565 ?
C14 Cs1 C17 103.76(10) . 4_565 ?
O431 Cs1 C47 61.06(9) 3_756 1_655 ?
O411 Cs1 C47 47.90(9) 1_655 1_655 ?
O131 Cs1 C47 152.45(9) . 1_655 ?
O131 Cs1 C47 75.77(9) 3_756 1_655 ?
O111 Cs1 C47 140.53(8) 4_565 1_655 ?
O1 Cs1 C47 98.96(9) 4_666 1_655 ?
C13 Cs1 C47 145.67(10) . 1_655 ?
O1 Cs1 C47 58.09(9) 1_655 1_655 ?
C14 Cs1 C47 122.49(10) . 1_655 ?
C17 Cs1 C47 124.04(10) 4_565 1_655 ?
O431 Cs1 C14 88.20(8) 3_756 3_756 ?
O411 Cs1 C14 137.68(9) 1_655 3_756 ?
O131 Cs1 C14 73.67(8) . 3_756 ?
O131 Cs1 C14 38.24(8) 3_756 3_756 ?
O111 Cs1 C14 69.08(8) 4_565 3_756 ?
O1 Cs1 C14 168.55(9) 4_666 3_756 ?
C13 Cs1 C14 94.22(10) . 3_756 ?
O1 Cs1 C14 101.06(9) 1_655 3_756 ?
C14 Cs1 C14 96.67(9) . 3_756 ?
C17 Cs1 C14 114.11(9) 4_565 3_756 ?
C47 Cs1 C14 91.50(10) 1_655 3_756 ?
O431 Mn2 O131 89.67(12) . . ?
O431 Mn2 N1 166.66(14) . . ?
O131 Mn2 N1 90.90(13) . . ?
O431 Mn2 N4 92.00(13) . . ?
O131 Mn2 N4 165.93(14) . . ?
N1 Mn2 N4 84.30(14) . . ?
O431 Mn2 O111 98.59(12) . 4_565 ?
O131 Mn2 O111 92.83(12) . 4_565 ?
N1 Mn2 O111 94.69(13) . 4_565 ?
N4 Mn2 O111 100.72(13) . 4_565 ?
O431 Mn2 Cs1 44.70(8) . 3_756 ?
O131 Mn2 Cs1 46.26(8) . 3_756 ?
N1 Mn2 Cs1 131.61(10) . 3_756 ?
N4 Mn2 Cs1 130.92(10) . 3_756 ?
O111 Mn2 Cs1 106.72(8) 4_565 3_756 ?
O431 Mn2 Cs1 95.46(9) . . ?
O131 Mn2 Cs1 44.88(9) . . ?
N1 Mn2 Cs1 94.33(10) . . ?
N4 Mn2 Cs1 148.54(11) . . ?
O111 Mn2 Cs1 47.95(8) 4_565 . ?
Cs1 Mn2 Cs1 71.646(12) 3_756 . ?
C11 N1 C2 119.6(3) . . ?
C11 N1 Mn2 131.3(3) . . ?
C2 N1 Mn2 109.0(2) . . ?
N1 C2 C3 107.2(3) . . ?
N1 C2 H2A 110.3 . . ?
C3 C2 H2A 110.3 . . ?
N1 C2 H2B 110.3 . . ?
C3 C2 H2B 110.3 . . ?
H2A C2 H2B 108.5 . . ?
N4 C3 C2 108.0(3) . . ?
N4 C3 H3A 110.1 . . ?
C2 C3 H3A 110.1 . . ?
N4 C3 H3B 110.1 . . ?
C2 C3 H3B 110.1 . . ?
H3A C3 H3B 108.4 . . ?
C41 N4 C3 117.0(3) . . ?
C41 N4 Mn2 129.6(3) . . ?
C3 N4 Mn2 112.2(3) . . ?
O111 C11 N1 122.9(4) . . ?
O111 C11 C12 118.0(4) . . ?
N1 C11 C12 119.1(4) . . ?
O111 C11 Cs1 46.7(2) . 4_566 ?
N1 C11 Cs1 137.4(3) . 4_566 ?
C12 C11 Cs1 85.1(2) . 4_566 ?
C17 C12 C13 118.4(4) . . ?
C17 C12 C11 117.9(4) . . ?
C13 C12 C11 123.6(4) . . ?
O131 C13 C14 116.9(4) . . ?
O131 C13 C12 124.5(4) . . ?
C14 C13 C12 118.5(4) . . ?
O131 C13 Cs1 66.3(2) . . ?
C14 C13 Cs1 83.5(3) . . ?
C12 C13 Cs1 118.7(3) . . ?
O131 C13 Cs1 48.53(19) . 3_756 ?
C14 C13 Cs1 75.3(2) . 3_756 ?
C12 C13 Cs1 153.6(3) . 3_756 ?
Cs1 C13 Cs1 83.53(9) . 3_756 ?
C15 C14 C13 121.1(4) . . ?
C15 C14 Cs1 124.7(3) . . ?
C13 C14 Cs1 73.3(2) . . ?
C15 C14 Cs1 145.5(3) . 3_756 ?
C13 C14 Cs1 83.5(2) . 3_756 ?
Cs1 C14 Cs1 83.33(9) . 3_756 ?
C15 C14 H14 119.5 . . ?
C13 C14 H14 119.5 . . ?
Cs1 C14 H14 73.3 . . ?
C14 C15 C16 120.8(4) . . ?
C14 C15 H15 119.6 . . ?
C16 C15 H15 119.6 . . ?
C15 C16 C17 119.1(4) . . ?
C15 C16 H16 120.5 . . ?
C17 C16 H16 120.5 . . ?
C16 C17 C12 122.1(4) . . ?
C16 C17 Cs1 112.5(3) . 4_566 ?
C12 C17 Cs1 100.4(3) . 4_566 ?
C16 C17 H17 119 . . ?
C12 C17 H17 119 . . ?
Cs1 C17 H17 54.5 4_566 . ?
C11 O111 Mn2 139.8(3) . 4_566 ?
C11 O111 Cs1 116.2(2) . 4_566 ?
Mn2 O111 Cs1 101.56(10) 4_566 4_566 ?
C13 O131 Mn2 128.8(3) . . ?
C13 O131 Cs1 90.8(2) . . ?
Mn2 O131 Cs1 109.97(12) . . ?
C13 O131 Cs1 112.9(2) . 3_756 ?
Mn2 O131 Cs1 108.03(11) . 3_756 ?
Cs1 O131 Cs1 101.59(8) . 3_756 ?
O411 C41 N4 121.5(4) . . ?
O411 C41 C42 118.7(4) . . ?
N4 C41 C42 119.7(4) . . ?
C47 C42 C43 118.5(4) . . ?
C47 C42 C41 118.2(4) . . ?
C43 C42 C41 123.3(4) . . ?
O431 C43 C44 116.4(4) . . ?
O431 C43 C42 124.9(4) . . ?
C44 C43 C42 118.7(4) . . ?
C45 C44 C43 121.7(4) . . ?
C45 C44 Cs1 149.5(3) . 3_756 ?
C43 C44 Cs1 82.7(2) . 3_756 ?
C45 C44 H44 119.2 . . ?
C43 C44 H44 119.2 . . ?
C44 C45 C46 119.4(4) . . ?
C44 C45 H45 120.3 . . ?
C46 C45 H45 120.3 . . ?
C47 C46 C45 119.1(4) . . ?
C47 C46 H46 120.4 . . ?
C45 C46 H46 120.4 . . ?
C46 C47 C42 122.5(4) . . ?
C46 C47 Cs1 117.6(3) . 1_455 ?
C42 C47 Cs1 106.6(3) . 1_455 ?
C46 C47 H47 118.7 . . ?
C42 C47 H47 118.7 . . ?
C41 O411 Cs1 127.2(3) . 1_455 ?
C43 O431 Mn2 129.0(3) . . ?
C43 O431 Cs1 118.5(2) . 3_756 ?
Mn2 O431 Cs1 110.36(11) . 3_756 ?
Cs1 O1 Cs1 132.44(11) 4_465 1_455 ?
Cs1 O1 H1A 70(4) 4_465 . ?
Cs1 O1 H1A 147(4) 1_455 . ?
Cs1 O1 H1B 148(4) 4_465 . ?
Cs1 O1 H1B 61(4) 1_455 . ?
H1A O1 H1B 115(6) . . ?
 
loop_
    _geom_torsion_atom_site_label_1
    _geom_torsion_atom_site_label_2
    _geom_torsion_atom_site_label_3
    _geom_torsion_atom_site_label_4
    _geom_torsion
    _geom_torsion_site_symmetry_1
    _geom_torsion_site_symmetry_2
    _geom_torsion_site_symmetry_3
    _geom_torsion_site_symmetry_4
    _geom_torsion_publ_flag
O431 Cs1 Mn2 O431 -63.29(13) 3_756 . . . ?
O411 Cs1 Mn2 O431 168.97(14) 1_655 . . . ?
O131 Cs1 Mn2 O431 -84.01(15) . . . . ?
O131 Cs1 Mn2 O431 -20.73(10) 3_756 . . . ?
O111 Cs1 Mn2 O431 96.65(14) 4_565 . . . ?
O1 Cs1 Mn2 O431 -162.46(11) 4_666 . . . ?
C13 Cs1 Mn2 O431 -108.72(14) . . . . ?
O1 Cs1 Mn2 O431 102.66(11) 1_655 . . . ?
C14 Cs1 Mn2 O431 -96.27(12) . . . . ?
C17 Cs1 Mn2 O431 143.43(12) 4_565 . . . ?
C47 Cs1 Mn2 O431 19.9(2) 1_655 . . . ?
C14 Cs1 Mn2 O431 12.39(11) 3_756 . . . ?
O431 Cs1 Mn2 O131 20.72(13) 3_756 . . . ?
O411 Cs1 Mn2 O131 -107.02(16) 1_655 . . . ?
O131 Cs1 Mn2 O131 63.28(15) 3_756 . . . ?
O111 Cs1 Mn2 O131 -179.34(16) 4_565 . . . ?
O1 Cs1 Mn2 O131 -78.45(13) 4_666 . . . ?
C13 Cs1 Mn2 O131 -24.71(16) . . . . ?
O1 Cs1 Mn2 O131 -173.33(14) 1_655 . . . ?
C14 Cs1 Mn2 O131 -12.26(14) . . . . ?
C17 Cs1 Mn2 O131 -132.56(14) 4_565 . . . ?
C47 Cs1 Mn2 O131 103.9(2) 1_655 . . . ?
C14 Cs1 Mn2 O131 96.40(14) 3_756 . . . ?
O431 Cs1 Mn2 N1 107.64(12) 3_756 . . . ?
O411 Cs1 Mn2 N1 -20.10(15) 1_655 . . . ?
O131 Cs1 Mn2 N1 86.92(16) . . . . ?
O131 Cs1 Mn2 N1 150.20(11) 3_756 . . . ?
O111 Cs1 Mn2 N1 -92.41(14) 4_565 . . . ?
O1 Cs1 Mn2 N1 8.47(12) 4_666 . . . ?
C13 Cs1 Mn2 N1 62.21(14) . . . . ?
O1 Cs1 Mn2 N1 -86.40(12) 1_655 . . . ?
C14 Cs1 Mn2 N1 74.66(13) . . . . ?
C17 Cs1 Mn2 N1 -45.64(13) 4_565 . . . ?
C47 Cs1 Mn2 N1 -169.2(2) 1_655 . . . ?
C14 Cs1 Mn2 N1 -176.68(12) 3_756 . . . ?
O431 Cs1 Mn2 N4 -166.2(2) 3_756 . . . ?
O411 Cs1 Mn2 N4 66.1(2) 1_655 . . . ?
O131 Cs1 Mn2 N4 173.1(2) . . . . ?
O131 Cs1 Mn2 N4 -123.6(2) 3_756 . . . ?
O111 Cs1 Mn2 N4 -6.3(2) 4_565 . . . ?
O1 Cs1 Mn2 N4 94.6(2) 4_666 . . . ?
C13 Cs1 Mn2 N4 148.4(2) . . . . ?
O1 Cs1 Mn2 N4 -0.2(2) 1_655 . . . ?
C14 Cs1 Mn2 N4 160.8(2) . . . . ?
C17 Cs1 Mn2 N4 40.5(2) 4_565 . . . ?
C47 Cs1 Mn2 N4 -83.0(3) 1_655 . . . ?
C14 Cs1 Mn2 N4 -90.5(2) 3_756 . . . ?
O431 Cs1 Mn2 O111 -159.94(12) 3_756 . . 4_565 ?
O411 Cs1 Mn2 O111 72.32(15) 1_655 . . 4_565 ?
O131 Cs1 Mn2 O111 179.34(16) . . . 4_565 ?
O131 Cs1 Mn2 O111 -117.39(11) 3_756 . . 4_565 ?
O1 Cs1 Mn2 O111 100.89(12) 4_666 . . 4_565 ?
C13 Cs1 Mn2 O111 154.62(14) . . . 4_565 ?
O1 Cs1 Mn2 O111 6.01(13) 1_655 . . 4_565 ?
C14 Cs1 Mn2 O111 167.08(13) . . . 4_565 ?
C17 Cs1 Mn2 O111 46.77(13) 4_565 . . 4_565 ?
C47 Cs1 Mn2 O111 -76.7(2) 1_655 . . 4_565 ?
C14 Cs1 Mn2 O111 -84.26(12) 3_756 . . 4_565 ?
O431 Cs1 Mn2 Cs1 -24.93(6) 3_756 . . 3_756 ?
O411 Cs1 Mn2 Cs1 -152.66(11) 1_655 . . 3_756 ?
O131 Cs1 Mn2 Cs1 -45.64(12) . . . 3_756 ?
O131 Cs1 Mn2 Cs1 17.63(5) 3_756 . . 3_756 ?
O111 Cs1 Mn2 Cs1 135.02(10) 4_565 . . 3_756 ?
O1 Cs1 Mn2 Cs1 -124.09(7) 4_666 . . 3_756 ?
C13 Cs1 Mn2 Cs1 -70.36(10) . . . 3_756 ?
O1 Cs1 Mn2 Cs1 141.03(7) 1_655 . . 3_756 ?
C14 Cs1 Mn2 Cs1 -57.90(8) . . . 3_756 ?
C17 Cs1 Mn2 Cs1 -178.21(8) 4_565 . . 3_756 ?
C47 Cs1 Mn2 Cs1 58.3(2) 1_655 . . 3_756 ?
C14 Cs1 Mn2 Cs1 50.76(7) 3_756 . . 3_756 ?
O431 Mn2 N1 C11 81.5(7) . . . . ?
O131 Mn2 N1 C11 -10.8(4) . . . . ?
N4 Mn2 N1 C11 155.9(4) . . . . ?
O111 Mn2 N1 C11 -103.8(4) 4_565 . . . ?
Cs1 Mn2 N1 C11 13.6(4) 3_756 . . . ?
Cs1 Mn2 N1 C11 -55.6(4) . . . . ?
O431 Mn2 N1 C2 -99.8(6) . . . . ?
O131 Mn2 N1 C2 167.9(3) . . . . ?
N4 Mn2 N1 C2 -25.4(3) . . . . ?
O111 Mn2 N1 C2 74.9(3) 4_565 . . . ?
Cs1 Mn2 N1 C2 -167.8(2) 3_756 . . . ?
Cs1 Mn2 N1 C2 123.0(3) . . . . ?
C11 N1 C2 C3 -136.1(4) . . . . ?
Mn2 N1 C2 C3 45.0(4) . . . . ?
N1 C2 C3 N4 -44.8(4) . . . . ?
C2 C3 N4 C41 -166.8(4) . . . . ?
C2 C3 N4 Mn2 24.8(4) . . . . ?
O431 Mn2 N4 C41 0.4(4) . . . . ?
O131 Mn2 N4 C41 -96.2(6) . . . . ?
N1 Mn2 N4 C41 -166.8(4) . . . . ?
O111 Mn2 N4 C41 99.5(4) 4_565 . . . ?
Cs1 Mn2 N4 C41 -24.0(4) 3_756 . . . ?
Cs1 Mn2 N4 C41 104.2(4) . . . . ?
O431 Mn2 N4 C3 167.0(3) . . . . ?
O131 Mn2 N4 C3 70.4(6) . . . . ?
N1 Mn2 N4 C3 -0.2(3) . . . . ?
O111 Mn2 N4 C3 -93.9(3) 4_565 . . . ?
Cs1 Mn2 N4 C3 142.6(2) 3_756 . . . ?
Cs1 Mn2 N4 C3 -89.2(3) . . . . ?
C2 N1 C11 O111 1.4(6) . . . . ?
Mn2 N1 C11 O111 180.0(3) . . . . ?
C2 N1 C11 C12 -175.9(4) . . . . ?
Mn2 N1 C11 C12 2.6(6) . . . . ?
C2 N1 C11 Cs1 -58.4(5) . . . 4_566 ?
Mn2 N1 C11 Cs1 120.2(3) . . . 4_566 ?
O111 C11 C12 C17 6.8(6) . . . . ?
N1 C11 C12 C17 -175.7(4) . . . . ?
Cs1 C11 C12 C17 41.3(4) 4_566 . . . ?
O111 C11 C12 C13 -169.2(4) . . . . ?
N1 C11 C12 C13 8.3(6) . . . . ?
Cs1 C11 C12 C13 -134.7(4) 4_566 . . . ?
C17 C12 C13 O131 177.8(4) . . . . ?
C11 C12 C13 O131 -6.3(7) . . . . ?
C17 C12 C13 C14 -3.9(6) . . . . ?
C11 C12 C13 C14 172.1(4) . . . . ?
C17 C12 C13 Cs1 -102.6(4) . . . . ?
C11 C12 C13 Cs1 73.4(4) . . . . ?
C17 C12 C13 Cs1 112.7(6) . . . 3_756 ?
C11 C12 C13 Cs1 -71.4(7) . . . 3_756 ?
O431 Cs1 C13 O131 -114.0(2) 3_756 . . . ?
O411 Cs1 C13 O131 169.68(19) 1_655 . . . ?
O131 Cs1 C13 O131 -63.9(2) 3_756 . . . ?
O111 Cs1 C13 O131 40.3(2) 4_565 . . . ?
O1 Cs1 C13 O131 151.8(2) 4_666 . . . ?
O1 Cs1 C13 O131 96.8(3) 1_655 . . . ?
C14 Cs1 C13 O131 -123.2(4) . . . . ?
C17 Cs1 C13 O131 87.7(2) 4_565 . . . ?
C47 Cs1 C13 O131 -125.0(2) 1_655 . . . ?
C14 Cs1 C13 O131 -26.1(2) 3_756 . . . ?
O431 Cs1 C13 C14 9.3(2) 3_756 . . . ?
O411 Cs1 C13 C14 -67.1(3) 1_655 . . . ?
O131 Cs1 C13 C14 123.2(4) . . . . ?
O131 Cs1 C13 C14 59.3(2) 3_756 . . . ?
O111 Cs1 C13 C14 163.5(3) 4_565 . . . ?
O1 Cs1 C13 C14 -85.0(2) 4_666 . . . ?
O1 Cs1 C13 C14 -140.0(2) 1_655 . . . ?
C17 Cs1 C13 C14 -149.1(2) 4_565 . . . ?
C47 Cs1 C13 C14 -1.8(3) 1_655 . . . ?
C14 Cs1 C13 C14 97.1(2) 3_756 . . . ?
O431 Cs1 C13 C12 128.3(3) 3_756 . . . ?
O411 Cs1 C13 C12 51.9(3) 1_655 . . . ?
O131 Cs1 C13 C12 -117.7(4) . . . . ?
O131 Cs1 C13 C12 178.4(3) 3_756 . . . ?
O111 Cs1 C13 C12 -77.4(3) 4_565 . . . ?
O1 Cs1 C13 C12 34.1(3) 4_666 . . . ?
O1 Cs1 C13 C12 -20.9(4) 1_655 . . . ?
C14 Cs1 C13 C12 119.0(4) . . . . ?
C17 Cs1 C13 C12 -30.0(3) 4_565 . . . ?
C47 Cs1 C13 C12 117.2(3) 1_655 . . . ?
C14 Cs1 C13 C12 -143.9(3) 3_756 . . . ?
O431 Cs1 C13 Cs1 -66.66(7) 3_756 . . 3_756 ?
O411 Cs1 C13 Cs1 -143.02(7) 1_655 . . 3_756 ?
O131 Cs1 C13 Cs1 47.31(19) . . . 3_756 ?
O131 Cs1 C13 Cs1 -16.60(7) 3_756 . . 3_756 ?
O111 Cs1 C13 Cs1 87.62(8) 4_565 . . 3_756 ?
O1 Cs1 C13 Cs1 -160.87(10) 4_666 . . 3_756 ?
O1 Cs1 C13 Cs1 144.14(16) 1_655 . . 3_756 ?
C14 Cs1 C13 Cs1 -75.9(2) . . . 3_756 ?
C17 Cs1 C13 Cs1 135.02(9) 4_565 . . 3_756 ?
C47 Cs1 C13 Cs1 -77.71(17) 1_655 . . 3_756 ?
C14 Cs1 C13 Cs1 21.18(8) 3_756 . . 3_756 ?
O131 C13 C14 C15 -179.9(4) . . . . ?
C12 C13 C14 C15 1.6(6) . . . . ?
Cs1 C13 C14 C15 120.9(4) . . . . ?
Cs1 C13 C14 C15 -154.1(4) 3_756 . . . ?
O131 C13 C14 Cs1 59.2(3) . . . . ?
C12 C13 C14 Cs1 -119.3(4) . . . . ?
Cs1 C13 C14 Cs1 84.97(7) 3_756 . . . ?
O131 C13 C14 Cs1 -25.7(3) . . . 3_756 ?
C12 C13 C14 Cs1 155.7(4) . . . 3_756 ?
Cs1 C13 C14 Cs1 -84.97(7) . . . 3_756 ?
O431 Cs1 C14 C15 73.9(4) 3_756 . . . ?
O411 Cs1 C14 C15 8.1(4) 1_655 . . . ?
O131 Cs1 C14 C15 -146.8(4) . . . . ?
O131 Cs1 C14 C15 125.5(4) 3_756 . . . ?
O111 Cs1 C14 C15 -132.3(4) 4_565 . . . ?
O1 Cs1 C14 C15 -28.2(4) 4_666 . . . ?
C13 Cs1 C14 C15 -116.6(5) . . . . ?
O1 Cs1 C14 C15 -24.0(6) 1_655 . . . ?
C17 Cs1 C14 C15 -84.8(4) 4_565 . . . ?
C47 Cs1 C14 C15 62.2(4) 1_655 . . . ?
C14 Cs1 C14 C15 158.3(4) 3_756 . . . ?
O431 Cs1 C14 C13 -169.6(3) 3_756 . . . ?
O411 Cs1 C14 C13 124.7(2) 1_655 . . . ?
O131 Cs1 C14 C13 -30.3(2) . . . . ?
O131 Cs1 C14 C13 -118.0(2) 3_756 . . . ?
O111 Cs1 C14 C13 -15.7(2) 4_565 . . . ?
O1 Cs1 C14 C13 88.4(2) 4_666 . . . ?
O1 Cs1 C14 C13 92.6(4) 1_655 . . . ?
C17 Cs1 C14 C13 31.7(3) 4_565 . . . ?
C47 Cs1 C14 C13 178.8(2) 1_655 . . . ?
C14 Cs1 C14 C13 -85.1(2) 3_756 . . . ?
O431 Cs1 C14 Cs1 -84.45(9) 3_756 . . 3_756 ?
O411 Cs1 C14 Cs1 -150.18(7) 1_655 . . 3_756 ?
O131 Cs1 C14 Cs1 54.87(10) . . . 3_756 ?
O131 Cs1 C14 Cs1 -32.83(7) 3_756 . . 3_756 ?
O111 Cs1 C14 Cs1 69.42(8) 4_565 . . 3_756 ?
O1 Cs1 C14 Cs1 173.51(10) 4_666 . . 3_756 ?
C13 Cs1 C14 Cs1 85.1(2) . . . 3_756 ?
O1 Cs1 C14 Cs1 177.7(3) 1_655 . . 3_756 ?
C17 Cs1 C14 Cs1 116.88(9) 4_565 . . 3_756 ?
C47 Cs1 C14 Cs1 -96.06(10) 1_655 . . 3_756 ?
C14 Cs1 C14 Cs1 0 3_756 . . 3_756 ?
C13 C14 C15 C16 0.6(7) . . . . ?
Cs1 C14 C15 C16 91.1(5) . . . . ?
Cs1 C14 C15 C16 -129.4(5) 3_756 . . . ?
C14 C15 C16 C17 -0.6(7) . . . . ?
C15 C16 C17 C12 -1.9(7) . . . . ?
C15 C16 C17 Cs1 -121.2(4) . . . 4_566 ?
C13 C12 C17 C16 4.1(6) . . . . ?
C11 C12 C17 C16 -172.1(4) . . . . ?
C13 C12 C17 Cs1 129.1(3) . . . 4_566 ?
C11 C12 C17 Cs1 -47.1(4) . . . 4_566 ?
N1 C11 O111 Mn2 75.3(6) . . . 4_566 ?
C12 C11 O111 Mn2 -107.3(4) . . . 4_566 ?
Cs1 C11 O111 Mn2 -158.1(5) 4_566 . . 4_566 ?
N1 C11 O111 Cs1 -126.6(3) . . . 4_566 ?
C12 C11 O111 Cs1 50.8(4) . . . 4_566 ?
C14 C13 O131 Mn2 174.5(3) . . . . ?
C12 C13 O131 Mn2 -7.1(6) . . . . ?
Cs1 C13 O131 Mn2 -116.7(3) . . . . ?
Cs1 C13 O131 Mn2 140.4(4) 3_756 . . . ?
C14 C13 O131 Cs1 -68.8(4) . . . . ?
C12 C13 O131 Cs1 109.6(4) . . . . ?
Cs1 C13 O131 Cs1 -102.94(15) 3_756 . . . ?
C14 C13 O131 Cs1 34.1(4) . . . 3_756 ?
C12 C13 O131 Cs1 -147.5(3) . . . 3_756 ?
Cs1 C13 O131 Cs1 102.94(15) . . . 3_756 ?
O431 Mn2 O131 C13 -153.8(3) . . . . ?
N1 Mn2 O131 C13 12.8(3) . . . . ?
N4 Mn2 O131 C13 -57.0(7) . . . . ?
O111 Mn2 O131 C13 107.6(3) 4_565 . . . ?
Cs1 Mn2 O131 C13 -141.9(4) 3_756 . . . ?
Cs1 Mn2 O131 C13 108.1(4) . . . . ?
O431 Mn2 O131 Cs1 98.09(13) . . . . ?
N1 Mn2 O131 Cs1 -95.24(13) . . . . ?
N4 Mn2 O131 Cs1 -165.0(5) . . . . ?
O111 Mn2 O131 Cs1 -0.49(12) 4_565 . . . ?
Cs1 Mn2 O131 Cs1 110.07(14) 3_756 . . . ?
O431 Mn2 O131 Cs1 -11.98(13) . . . 3_756 ?
N1 Mn2 O131 Cs1 154.70(13) . . . 3_756 ?
N4 Mn2 O131 Cs1 84.9(6) . . . 3_756 ?
O111 Mn2 O131 Cs1 -110.56(11) 4_565 . . 3_756 ?
Cs1 Mn2 O131 Cs1 -110.07(14) . . . 3_756 ?
O431 Cs1 O131 C13 66.0(2) 3_756 . . . ?
O411 Cs1 O131 C13 -15.9(3) 1_655 . . . ?
O131 Cs1 O131 C13 113.6(2) 3_756 . . . ?
O111 Cs1 O131 C13 -131.7(2) 4_565 . . . ?
O1 Cs1 O131 C13 -27.2(2) 4_666 . . . ?
O1 Cs1 O131 C13 -121.8(2) 1_655 . . . ?
C14 Cs1 O131 C13 30.6(2) . . . . ?
C17 Cs1 O131 C13 -89.7(2) 4_565 . . . ?
C47 Cs1 O131 C13 93.0(3) 1_655 . . . ?
C14 Cs1 O131 C13 152.8(2) 3_756 . . . ?
O431 Cs1 O131 Mn2 -161.82(12) 3_756 . . . ?
O411 Cs1 O131 Mn2 116.23(14) 1_655 . . . ?
O131 Cs1 O131 Mn2 -114.25(14) 3_756 . . . ?
O111 Cs1 O131 Mn2 0.41(10) 4_565 . . . ?
O1 Cs1 O131 Mn2 104.97(12) 4_666 . . . ?
C13 Cs1 O131 Mn2 132.1(3) . . . . ?
O1 Cs1 O131 Mn2 10.3(2) 1_655 . . . ?
C14 Cs1 O131 Mn2 162.7(2) . . . . ?
C17 Cs1 O131 Mn2 42.43(12) 4_565 . . . ?
C47 Cs1 O131 Mn2 -134.90(16) 1_655 . . . ?
C14 Cs1 O131 Mn2 -75.09(12) 3_756 . . . ?
O431 Cs1 O131 Cs1 -47.56(8) 3_756 . . 3_756 ?
O411 Cs1 O131 Cs1 -129.51(12) 1_655 . . 3_756 ?
O131 Cs1 O131 Cs1 0 3_756 . . 3_756 ?
O111 Cs1 O131 Cs1 114.66(10) 4_565 . . 3_756 ?
O1 Cs1 O131 Cs1 -140.78(8) 4_666 . . 3_756 ?
C13 Cs1 O131 Cs1 -113.6(2) . . . 3_756 ?
O1 Cs1 O131 Cs1 124.57(13) 1_655 . . 3_756 ?
C14 Cs1 O131 Cs1 -83.00(13) . . . 3_756 ?
C17 Cs1 O131 Cs1 156.68(10) 4_565 . . 3_756 ?
C47 Cs1 O131 Cs1 -20.6(2) 1_655 . . 3_756 ?
C14 Cs1 O131 Cs1 39.16(8) 3_756 . . 3_756 ?
C3 N4 C41 O411 5.4(6) . . . . ?
Mn2 N4 C41 O411 171.5(3) . . . . ?
C3 N4 C41 C42 -175.8(4) . . . . ?
Mn2 N4 C41 C42 -9.8(6) . . . . ?
O411 C41 C42 C47 9.2(6) . . . . ?
N4 C41 C42 C47 -169.5(4) . . . . ?
O411 C41 C42 C43 -168.9(4) . . . . ?
N4 C41 C42 C43 12.4(6) . . . . ?
C47 C42 C43 O431 178.6(4) . . . . ?
C41 C42 C43 O431 -3.3(7) . . . . ?
C47 C42 C43 C44 -0.8(6) . . . . ?
C41 C42 C43 C44 177.3(4) . . . . ?
O431 C43 C44 C45 179.8(4) . . . . ?
C42 C43 C44 C45 -0.8(6) . . . . ?
O431 C43 C44 Cs1 19.4(3) . . . 3_756 ?
C42 C43 C44 Cs1 -161.2(4) . . . 3_756 ?
C43 C44 C45 C46 2.1(7) . . . . ?
Cs1 C44 C45 C46 141.0(5) 3_756 . . . ?
C44 C45 C46 C47 -1.8(7) . . . . ?
C45 C46 C47 C42 0.2(7) . . . . ?
C45 C46 C47 Cs1 -135.5(4) . . . 1_455 ?
C43 C42 C47 C46 1.1(7) . . . . ?
C41 C42 C47 C46 -177.1(4) . . . . ?
C43 C42 C47 Cs1 140.9(3) . . . 1_455 ?
C41 C42 C47 Cs1 -37.3(4) . . . 1_455 ?
N4 C41 O411 Cs1 -143.7(3) . . . 1_455 ?
C42 C41 O411 Cs1 37.6(5) . . . 1_455 ?
C44 C43 O431 Mn2 170.6(3) . . . . ?
C42 C43 O431 Mn2 -8.8(6) . . . . ?
C44 C43 O431 Cs1 -27.8(5) . . . 3_756 ?
C42 C43 O431 Cs1 152.9(3) . . . 3_756 ?
O131 Mn2 O431 C43 175.1(3) . . . . ?
N1 Mn2 O431 C43 82.6(7) . . . . ?
N4 Mn2 O431 C43 9.1(4) . . . . ?
O111 Mn2 O431 C43 -92.0(3) 4_565 . . . ?
Cs1 Mn2 O431 C43 162.8(4) 3_756 . . . ?
Cs1 Mn2 O431 C43 -140.3(3) . . . . ?
O131 Mn2 O431 Cs1 12.31(13) . . . 3_756 ?
N1 Mn2 O431 Cs1 -80.2(6) . . . 3_756 ?
N4 Mn2 O431 Cs1 -153.72(14) . . . 3_756 ?
O111 Mn2 O431 Cs1 105.12(12) 4_565 . . 3_756 ?
Cs1 Mn2 O431 Cs1 56.88(10) . . . 3_756 ?

 
loop_
 _refln_index_h
 _refln_index_k
 _refln_index_l
 _refln_F_squared_calc
 _refln_F_squared_meas
 _refln_F_squared_sigma
 _refln_observed_status
   1   0   0    11187.09    10932.93    177.08 o
   2   0   0      824.52      737.15     46.16 o
   3   0   0    33258.85    34123.83    453.16 o
   4   0   0    18194.92    19704.67    319.65 o
   5   0   0     2975.92     3148.24    118.64 o
   6   0   0     3501.80     3865.41    139.10 o
   7   0   0    15852.74    16165.52    330.36 o
   8   0   0    40372.40    40158.01    687.03 o
   9   0   0       10.28       88.64    117.07 o
  10   0   0     1179.34     1278.47    163.30 o
  11   0   0    29916.17    28791.96    672.37 o
  12   0   0     2739.59     2883.41    268.10 o
  13   0   0      101.07       35.59    192.62 o
  14   0   0     1937.43     1380.54    271.72 o
   1   1   0      750.25      732.38     23.86 o
   2   1   0     5756.77     5538.40     83.19 o
   3   1   0     9647.82    10421.88    140.73 o
   4   1   0        1.61       27.82     32.18 o
   5   1   0    19458.32    20204.80    247.10 o
   6   1   0    10401.74    10380.90    166.30 o
   7   1   0       15.63        4.98     57.00 o
   8   1   0     4420.99     4664.06    141.21 o
   9   1   0     3053.04     3232.38    142.17 o
  10   1   0      521.32      544.18    105.28 o
  11   1   0       88.42      191.67    116.66 o
  12   1   0       37.12       69.96    121.03 o
  13   1   0     1482.19     1065.19    171.83 o
  14   1   0     1461.81     1457.73    188.05 o
   0   2   0      589.30      622.12     50.12 o
   1   2   0       24.57       25.02     17.32 o
   2   2   0     5818.27     5950.51     96.07 o
   3   2   0      254.88      208.17     34.50 o
   4   2   0     2061.44     2032.67     72.14 o
   5   2   0     1467.61     1793.74     82.09 o
   6   2   0      155.63       70.64     49.03 o
   7   2   0      164.99       82.98     58.30 o
   8   2   0      157.80      128.80     67.50 o
   9   2   0      223.94      186.62     83.80 o
  10   2   0      127.30      103.85     90.48 o
  11   2   0       67.49       97.30    101.94 o
  12   2   0       13.53      231.90    127.92 o
  13   2   0        7.88      191.05    152.26 o
  14   2   0       14.46      159.55    162.83 o
   1   3   0     9383.77     9255.65    105.07 o
   2   3   0    25116.12    26272.39    309.49 o
   3   3   0    28874.00    28840.78    313.65 o
   4   3   0     7072.82     7391.94    127.78 o
   5   3   0    33133.18    33854.02    364.04 o
   6   3   0    13586.92    13695.31    201.56 o
   7   3   0      133.84      208.85     61.03 o
   8   3   0     3713.17     4216.43    149.94 o
   9   3   0     3347.54     4052.85    161.39 o
  10   3   0     5360.39     5369.78    182.80 o
  11   3   0      358.05      205.85    110.46 o
  12   3   0     2297.62     2503.28    173.12 o
  13   3   0     6999.91     7366.99    280.85 o
  14   3   0     3679.82     3327.98    232.37 o
   0   4   0    27099.77    26365.26    306.70 o
   1   4   0    30129.51    30057.96    235.10 o
   2   4   0      361.68      255.22     30.62 o
   3   4   0    28225.74    29005.04    306.90 o
   4   4   0     2749.60     2645.31     79.37 o
   5   4   0     6410.31     7167.21    126.55 o
   6   4   0     2359.85     2673.88    105.48 o
   7   4   0     3153.91     3009.42    130.30 o
   8   4   0    17865.83    18451.49    293.20 o
   9   4   0     4434.83     4645.59    162.35 o
  10   4   0     7691.17     7618.73    201.69 o
  11   4   0    10880.97    10494.50    246.63 o
  12   4   0     1007.08      667.12    133.51 o
  13   4   0      368.51      299.67    141.14 o
   1   5   0      184.99      167.33     27.14 o
   2   5   0    12081.16    12142.13    128.05 o
   3   5   0    14416.04    13643.22    166.44 o
   4   5   0      149.47       95.46     38.73 o
   5   5   0    21678.10    22322.29    259.65 o
   6   5   0    12424.12    12740.04    226.65 o
   7   5   0      566.43      564.16     83.39 o
   8   5   0     2823.13     3234.36    157.30 o
   9   5   0      622.83      536.14     98.46 o
  10   5   0      940.11      906.11    118.91 o
  11   5   0     2010.60     1964.75    152.05 o
  12   5   0       49.52      140.53    128.60 o
  13   5   0     3071.34     3234.36    200.94 o
   0   6   0      990.59      952.75     70.37 o
   1   6   0      180.44      121.44     29.87 o
   2   6   0       85.27       36.48     30.07 o
   3   6   0     2868.61     3046.03     72.21 o
   4   6   0     1716.08     1770.02     70.84 o
   5   6   0     2437.30     2735.04     94.91 o
   6   6   0      345.91      268.38     72.21 o
   7   6   0      645.95      690.65     91.30 o
   8   6   0       89.20       90.28     82.16 o
   9   6   0       95.24       80.66     94.23 o
  10   6   0       65.65      105.21     97.78 o
  11   6   0       20.99       29.80    111.82 o
  12   6   0       59.20      187.71    132.21 o
  13   6   0      655.28      468.98    154.64 o
   1   7   0    14473.66    14891.41    167.46 o
   2   7   0     8329.72     8073.79    111.01 o
   3   7   0     1472.42     1356.20     60.14 o
   4   7   0       18.29       26.80     43.77 o
   5   7   0    10686.73    11060.44    210.08 o
   6   7   0    17607.42    17916.92    293.67 o
   7   7   0     1665.14     1693.51    118.91 o
   8   7   0     3284.60     3254.13    163.10 o
   9   7   0     4454.58     4875.98    193.44 o
  10   7   0      853.08      643.87    127.92 o
  11   7   0      156.42      278.33    121.78 o
  12   7   0      861.35      528.23    144.48 o
  13   7   0     3789.18     4023.53    222.28 o
   0   8   0    19966.37    18736.51    298.65 o
   1   8   0    14981.14    15450.87    187.92 o
   2   8   0    12590.83    12502.76    152.05 o
   3   8   0    16309.06    16164.63    198.15 o
   4   8   0     3933.18     4036.01    112.71 o
   5   8   0      678.22      452.20     78.55 o
   6   8   0       41.61       54.82     72.07 o
   7   8   0     5857.47     5584.02    169.51 o
   8   8   0     9790.48     9615.59    227.40 o
   9   8   0     3619.82     3689.22    188.12 o
  10   8   0    10044.01     9390.31    250.51 o
  11   8   0     7639.44     7642.25    237.08 o
  12   8   0     1451.47     1232.92    159.48 o
  13   8   0      518.61      328.65    163.10 o
   1   9   0      130.60       59.93     45.96 o
   2   9   0    12346.42    12610.62    169.37 o
   3   9   0     9989.91     9620.50    142.44 o
   4   9   0      983.27      874.00     80.80 o
   5   9   0     8745.51     8830.44    197.87 o
   6   9   0     9272.36     9466.61    214.37 o
   7   9   0      274.85       82.98     85.98 o
   8   9   0     2167.38     2245.81    151.10 o
   9   9   0     1730.93     1576.98    150.35 o
  10   9   0      103.39       63.82    120.14 o
  11   9   0      495.32      491.89    144.01 o
  12   9   0       22.09       31.37    146.53 o
   0  10   0      241.45       45.21     69.00 o
   1  10   0      305.48      195.35     55.57 o
   2  10   0     2205.34     2013.44     93.82 o
   3  10   0      359.42      239.13     65.12 o
   4  10   0     9749.08     9922.16    198.15 o
   5  10   0      393.47      495.09     89.25 o
   6  10   0     1253.73     1143.26    115.51 o
   7  10   0     1787.18     1561.44    133.78 o
   8  10   0        2.11      100.10    100.23 o
   9  10   0       17.79       54.62    115.91 o
  10  10   0      252.99      189.83    132.42 o
  11  10   0        1.67      132.35    146.94 o
  12  10   0      705.85      516.37    170.12 o
   1  11   0     4224.31     3899.10    116.12 o
   2  11   0    20115.48    19704.33    278.47 o
   3  11   0     6022.60     5688.07    146.73 o
   4  11   0      244.46      197.67     80.66 o
   5  11   0     6205.78     5894.94    166.99 o
   6  11   0     5220.56     5436.53    184.24 o
   7  11   0      372.98      242.33    106.10 o
   8  11   0       70.81      135.28    114.69 o
   9  11   0     4542.74     4818.77    231.69 o
  10  11   0     3147.85     3602.01    222.56 o
  11  11   0       31.70       40.16    150.14 o
   0  12   0    16499.14    16121.34    353.34 o
   1  12   0     3921.79     3854.91    133.17 o
   2  12   0     5371.00     5114.56    153.35 o
   3  12   0     6762.97     6690.80    169.99 o
   4  12   0    13377.83    12911.66    246.63 o
   5  12   0      415.46      300.83     94.78 o
   6  12   0        2.65       48.21     99.14 o
   7  12   0     9099.77     9010.73    261.15 o
   8  12   0     6984.27     6401.83    240.28 o
   9  12   0      482.44      394.93    139.17 o
  10  12   0     2448.67     2134.40    212.19 o
  11  12   0     6017.65     6113.13    334.93 o
   1  13   0       98.58       96.00     99.55 o
   2  13   0       58.99      111.14     98.60 o
   3  13   0     8971.50     8759.19    268.99 o
   4  13   0      355.22      244.78    122.53 o
   5  13   0     5316.06     5597.38    252.22 o
   6  13   0     1012.93     1243.70    165.14 o
   7  13   0      138.99      135.01    139.85 o
   8  13   0     2820.63     3230.13    235.58 o
   9  13   0        2.70       61.84    158.46 o
  10  13   0        3.85        7.98    175.44 o
   0  14   0       47.60      140.60    175.85 o
   1  14   0      883.76      811.27    131.67 o
   2  14   0      162.13      130.17    117.41 o
   3  14   0        3.24      110.12    131.19 o
   4  14   0     3507.48     4171.90    261.42 o
   5  14   0     1056.88     1056.46    170.87 o
   6  14   0      983.29      865.81    171.42 o
   7  14   0     3009.10     3160.04    264.90 o
   8  14   0        9.88       41.18    156.35 o
   9  14   0      427.11      451.04    196.44 o
  10  14   0       70.74       11.93    199.51 o
   1  15   0     8740.53     8883.36    296.95 o
   2  15   0     7785.77     7635.64    292.10 o
   3  15   0     2301.38     2931.62    237.97 o
   4  15   0      743.07      665.08    169.71 o
   5  15   0     2464.87     2889.00    248.40 o
   6  15   0     2720.20     2833.57    249.08 o
   7  15   0     1834.90     1805.06    228.01 o
   8  15   0      541.11      528.91    211.10 o
   9  15   0     4853.29     5123.08    341.40 o
   0  16   0     5310.03     5805.75    396.97 o
   1  16   0      801.58      778.13    205.65 o
   2  16   0     1303.78     1431.75    211.44 o
   3  16   0     5091.02     5569.29    313.31 o
   4  16   0     4779.61     5644.43    305.20 o
   5  16   0      573.66      623.08    186.62 o
   6  16   0       41.81      132.42    174.35 o
   7  16   0     4661.19     4351.84    315.77 o
   8  16   0     4070.10     4566.08    357.90 o
   1  17   0      138.57       73.57    199.10 o
   2  17   0      455.36      306.70    227.53 o
   3  17   0      240.20      367.45    190.44 o
   4  17   0       14.11       73.23    173.39 o
   5  17   0      960.32     1003.96    216.08 o
   6  17   0      925.72      658.26    214.78 o
   7  17   0      768.94      842.63    237.69 o
   0  18   0      308.93      687.92    490.59 o
   1  18   0      318.02      279.22    230.87 o
   2  18   0      933.24     1108.55    272.33 o
   3  18   0      468.34      298.31    243.35 o
   4  18   0     2363.63     2437.82    273.42 o
   5  18   0       84.74      198.96    206.74 o
   6  18   0     1654.35     1991.21    270.90 o
   1  19   0     4154.12     5804.39    626.48 o
   2  19   0     3693.90     4929.23    442.52 o
   3  19   0      157.83      134.87    278.20 o
   4  19   0      115.06      454.86    258.49 o
   5  19   0     1083.26      930.45    257.19 o
   0  20   0     2993.69     3825.66    812.22 o
   1  20   0     1517.13     2001.64    484.11 o
   2  20   0       22.51      217.31    291.22 o
 -14   1   1     1118.52      908.29    187.03 o
 -13   1   1      736.01      546.57    166.24 o
 -12   1   1      478.50      444.98    141.76 o
 -11   1   1     4533.31     4763.27    206.94 o
 -10   1   1     6900.84     6659.16    195.83 o
  -9   1   1       25.25       29.66     77.87 o
  -8   1   1     9022.96     8969.54    185.60 o
  -7   1   1     6976.86     7125.14    152.12 o
  -6   1   1        3.80       29.25     43.64 o
  -5   1   1      934.21      917.63     55.78 o
  -4   1   1     2089.99     2313.52     63.41 o
  -3   1   1    17817.28    18213.12    177.08 o
  -2   1   1    19071.78    18972.84    175.92 o
  -1   1   1       14.61       34.50     19.09 o
   0   1   1    52232.09    50203.78    508.87 o
   1   1   1     4480.46     4390.37     75.48 o
   2   1   1     1007.39     1006.14     25.16 o
   3   1   1     6337.97     6241.73     79.09 o
   4   1   1     7937.28     8126.98    107.12 o
   5   1   1     2636.10     2750.79     68.46 o
   6   1   1      421.40      305.67     42.89 o
   7   1   1     1640.58     1677.28     80.32 o
   8   1   1    11943.88    12192.10    205.85 o
   9   1   1     1085.85      959.98     96.00 o
  10   1   1       30.15       63.82     83.19 o
  11   1   1     7459.94     7793.01    216.83 o
  12   1   1     1025.36      900.86    126.82 o
  13   1   1      525.67      437.07    154.30 o
  14   1   1      779.77      663.71    252.42 o
 -14   2   1     1343.76     1062.87    198.28 o
 -13   2   1     9340.13     9066.77    293.67 o
 -12   2   1     2888.41     2675.38    182.80 o
 -11   2   1      103.61       49.37    105.21 o
 -10   2   1     1603.33     1599.62    134.39 o
  -9   2   1     3181.46     3450.91    150.89 o
  -8   2   1    14725.38    15096.79    246.83 o
  -7   2   1     7258.63     7156.57    154.58 o
  -6   2   1     8422.03     8380.56    136.78 o
  -5   2   1    45120.91    44962.05    393.84 o
  -4   2   1    11235.61    11332.29    140.87 o
  -3   2   1     6770.27     6559.81     93.21 o
  -2   2   1     8318.91     8240.17     99.69 o
  -1   2   1      322.54      325.79     24.48 o
   0   2   1       25.68       17.25     18.48 o
   1   2   1     2444.02     2498.98     45.55 o
   2   2   1    18113.74    18550.02    191.87 o
   3   2   1    35962.25    35968.04    351.70 o
   4   2   1     2213.11     2351.09     62.46 o
   5   2   1    21427.46    20901.59    229.44 o
   6   2   1    27278.90    27732.09    297.29 o
   7   2   1     2785.19     2976.89     98.80 o
   8   2   1     4514.51     4728.91    140.32 o
   9   2   1     4540.22     4886.69    156.83 o
  10   2   1     1769.62     1837.31    123.96 o
  11   2   1      652.61      683.42    110.60 o
  12   2   1      422.33      255.28    118.16 o
  13   2   1     7411.11     7550.88    276.08 o
  14   2   1     8968.96     8748.62    483.02 o
 -14   3   1      826.87      478.59    186.69 o
 -13   3   1     1949.54     1501.78    193.58 o
 -12   3   1      342.95      259.99    131.19 o
 -11   3   1    10154.59     9754.69    238.99 o
 -10   3   1     4503.33     4763.41    190.17 o
  -9   3   1        0.19       76.98     83.53 o
  -8   3   1    12114.98    12229.81    221.47 o
  -7   3   1     2817.92     3078.76    122.60 o
  -6   3   1      698.60      744.38     61.98 o
  -5   3   1        8.17       27.61     38.25 o
  -4   3   1     7794.59     8669.53    121.23 o
  -3   3   1    35100.93    35133.24    327.15 o
  -2   3   1    16897.51    16543.68    166.24 o
  -1   3   1      754.16      859.27     34.71 o
   0   3   1    41285.50    41560.85    421.04 o
   1   3   1     9906.51     9886.97    120.07 o
   2   3   1        3.10       35.93     26.39 o
   3   3   1    18633.00    18856.04    210.42 o
   4   3   1     7715.54     8196.73    115.30 o
   5   3   1       60.38       54.62     37.71 o
   6   3   1        7.65        4.91     40.64 o
   7   3   1      560.63      379.04     66.00 o
   8   3   1    13201.49    12889.64    232.99 o
   9   3   1     4679.78     4779.09    155.67 o
  10   3   1     1466.39     1402.98    117.82 o
  11   3   1    11502.61    11867.34    248.67 o
  12   3   1     2034.38     1809.22    144.01 o
  13   3   1        0.81       42.27    151.58 o
  14   3   1      308.50      245.33    238.58 o
 -13   4   1       40.00      112.44    155.67 o
 -12   4   1      121.06      130.98    123.96 o
 -11   4   1      237.09      179.80    114.07 o
 -10   4   1      407.29      438.23    107.12 o
  -9   4   1     1454.33     1300.49    114.01 o
  -8   4   1      137.27       76.91     75.62 o
  -7   4   1       60.39       82.84     65.32 o
  -6   4   1      470.44      465.57     60.00 o
  -5   4   1      332.02      231.62     46.64 o
  -4   4   1      235.23      185.19     38.66 o
  -3   4   1      695.45      681.10     44.46 o
  -2   4   1      154.96      123.35     29.52 o
  -1   4   1      430.40      443.82     31.84 o
   0   4   1     2072.20     2176.94     47.66 o
   1   4   1        1.54       18.68     24.41 o
   2   4   1     2785.86     3075.76     72.82 o
   3   4   1      373.38      266.88     38.93 o
   4   4   1     3307.29     3721.34     84.00 o
   5   4   1     1540.12     1689.29     73.71 o
   6   4   1      600.48      423.43     52.30 o
   7   4   1        2.32       27.41     59.93 o
   8   4   1        0.71       38.32     70.16 o
   9   4   1      553.28      406.11     87.14 o
  10   4   1     1715.93     1772.40    127.44 o
  11   4   1       84.76      129.28    100.03 o
  12   4   1      286.59      348.77    116.66 o
  13   4   1       16.90      124.03    153.21 o
 -13   5   1      795.08      501.02    157.03 o
 -12   5   1      511.47      489.64    143.05 o
 -11   5   1     4130.55     4219.02    196.24 o
 -10   5   1     7900.88     7335.96    203.40 o
  -9   5   1       16.65       51.75     84.41 o
  -8   5   1     1989.40     2093.96    135.55 o
  -7   5   1     8225.68     7722.91    185.05 o
  -6   5   1     5055.51     4965.65    123.55 o
  -5   5   1     1390.16     1493.93     76.91 o
  -4   5   1     5121.26     4914.17     98.32 o
  -3   5   1    16989.49    17018.86    196.51 o
  -2   5   1    11406.82    11575.92    138.69 o
  -1   5   1     2203.77     2195.56     51.28 o
   0   5   1    15853.64    15242.16    149.67 o
   1   5   1    34478.38    34595.67    304.45 o
   2   5   1     1162.79     1296.95     62.93 o
   3   5   1     3986.36     3741.93     95.87 o
   4   5   1      419.51      192.08     44.87 o
   5   5   1     5449.04     5564.45    116.87 o
   6   5   1       77.05       53.25     57.00 o
   7   5   1     2803.81     3044.46    134.46 o
   8   5   1     8446.44     8478.47    193.65 o
   9   5   1     4845.79     5213.23    175.64 o
  10   5   1     1691.86     1554.35    124.71 o
  11   5   1     3843.57     4073.65    182.87 o
  12   5   1     1197.41     1168.96    140.94 o
  13   5   1      142.62       87.55    162.69 o
 -13   6   1     9015.62     8988.16    292.92 o
 -12   6   1     2841.05     3016.03    194.80 o
 -11   6   1       50.86      120.89    122.05 o
 -10   6   1      830.87      855.45    128.53 o
  -9   6   1     6777.31     6449.83    187.37 o
  -8   6   1     9910.28     9792.60    224.19 o
  -7   6   1      272.45      162.35     76.50 o
  -6   6   1    12863.13    12442.82    234.08 o
  -5   6   1    37802.89    37724.89    381.02 o
  -4   6   1     3839.68     3609.58     86.80 o
  -3   6   1     5218.97     4876.87     92.60 o
  -2   6   1    32429.02    32542.69    318.77 o
  -1   6   1    16014.73    16162.25    158.39 o
   0   6   1     1338.02     1393.63     52.30 o
   1   6   1      724.50      741.24     42.34 o
   2   6   1    21980.70    22269.31    232.72 o
   3   6   1    33529.10    35015.29    411.70 o
   4   6   1     2899.53     3004.98     97.10 o
   5   6   1    20568.06    20482.25    285.56 o
   6   6   1    32194.57    31673.19    418.79 o
   7   6   1      306.49      278.33     76.57 o
   8   6   1     3068.25     3149.81    150.55 o
   9   6   1     4980.97     5580.95    182.40 o
  10   6   1     3494.46     3920.85    175.58 o
  11   6   1     2716.30     2647.90    162.62 o
  12   6   1      118.56      202.24    122.26 o
  13   6   1     7846.78     7473.42    292.24 o
 -13   7   1     1026.78      740.29    181.30 o
 -12   7   1      138.58      231.35    140.73 o
 -11   7   1     3303.82     3716.15    202.85 o
 -10   7   1     5407.08     5806.57    221.47 o
  -9   7   1       21.73       85.85    100.44 o
  -8   7   1     4384.57     4878.23    177.28 o
  -7   7   1     2253.85     2386.89    142.37 o
  -6   7   1      983.41      836.49     91.91 o
  -5   7   1      311.76      271.72     56.87 o
  -4   7   1      263.76      159.01     46.77 o
  -3   7   1     5564.88     5578.15    103.98 o
  -2   7   1     7759.02     7501.24    116.80 o
  -1   7   1      147.28      118.03     35.25 o
   0   7   1     9134.41     8729.12    117.01 o
   1   7   1     6622.75     6497.36    101.53 o
   2   7   1     5431.19     5556.95     96.28 o
   3   7   1     9925.34     9833.58    158.33 o
   4   7   1       71.28       63.96     51.14 o
   5   7   1      927.20      780.11     79.84 o
   6   7   1      846.20      623.83     84.48 o
   7   7   1      357.85      273.22     78.96 o
   8   7   1     7456.00     7976.70    201.01 o
   9   7   1     4840.11     5331.53    195.49 o
  10   7   1     2564.82     2737.63    166.71 o
  11   7   1     5495.00     5490.13    205.99 o
  12   7   1     1353.52     1083.26    149.94 o
  13   7   1      159.87      320.88    178.03 o
 -13   8   1        6.29      332.13    185.33 o
 -12   8   1      449.01      212.67    149.87 o
 -11   8   1      520.62      575.55    139.17 o
 -10   8   1      160.23      202.51    116.26 o
  -9   8   1      619.28      627.98    118.91 o
  -8   8   1      819.77      682.46    114.07 o
  -7   8   1      482.47      262.99     90.28 o
  -6   8   1      310.52      202.99     81.96 o
  -5   8   1      225.14      123.35     64.84 o
  -4   8   1      910.91      776.49     65.18 o
  -3   8   1      768.89      625.73     58.30 o
  -2   8   1       54.06       48.28     37.77 o
  -1   8   1     4824.57     4597.86     90.07 o
   0   8   1      569.40      517.87     47.12 o
   1   8   1     4880.01     5008.81     94.57 o
   2   8   1      331.36      370.38     47.46 o
   3   8   1      542.60      448.04     50.53 o
   4   8   1        1.42       74.19     59.25 o
   5   8   1       99.39       60.07     64.37 o
   6   8   1       42.24       39.55     70.71 o
   7   8   1     1220.00     1015.96    105.21 o
   8   8   1      422.90      349.38     96.00 o
   9   8   1     1479.99     1338.06    128.19 o
  10   8   1     1627.58     1557.42    144.21 o
  11   8   1      294.40      156.83    129.14 o
  12   8   1      936.27      557.14    144.89 o
  13   8   1      132.10      196.30    189.35 o
 -12   9   1      744.39      595.87    174.21 o
 -11   9   1     6233.01     6664.48    266.67 o
 -10   9   1     5944.51     5751.27    235.72 o
  -9   9   1      108.82      209.74    110.66 o
  -8   9   1     3188.47     3404.21    182.33 o
  -7   9   1     7126.11     6918.06    194.94 o
  -6   9   1     3687.46     3683.70    159.96 o
  -5   9   1      259.15      106.51     69.28 o
  -4   9   1     4053.91     3945.46    120.69 o
  -3   9   1     7394.20     7573.38    119.60 o
  -2   9   1     2492.92     2513.57     85.03 o
  -1   9   1     2398.13     2625.13     91.71 o
   0   9   1    10627.36    10187.67    144.69 o
   1   9   1    18440.65    18569.86    217.51 o
   2   9   1      335.43      258.22     52.09 o
   3   9   1     4310.98     4360.30    118.71 o
   4   9   1    11007.26    11302.36    209.12 o
   5   9   1     3133.84     3201.36    139.85 o
   6   9   1      290.15      190.30     87.21 o
   7   9   1     4169.19     4697.27    177.76 o
   8   9   1     6638.94     6504.04    198.01 o
   9   9   1     2640.57     2427.59    162.35 o
  10   9   1     1266.34     1058.98    144.76 o
  11   9   1     2319.86     2491.28    181.30 o
  12   9   1     4040.58     4013.10    210.01 o
 -12  10   1     1731.91     1682.74    232.31 o
 -11  10   1      150.41      273.76    163.37 o
 -10  10   1     1916.28     1997.21    184.30 o
  -9  10   1     3314.25     3465.17    207.56 o
  -8  10   1     5738.79     5964.63    211.37 o
  -7  10   1      484.13      292.38    102.35 o
  -6  10   1     7030.72     6848.17    192.90 o
  -5  10   1    20398.36    20484.23    352.93 o
  -4  10   1     5412.06     5384.71    151.58 o
  -3  10   1    11851.88    11530.71    166.44 o
  -2  10   1    16361.45    15548.85    191.74 o
  -1  10   1     5475.58     5291.78    111.96 o
   0  10   1      327.10      150.69     51.07 o
   1  10   1      329.05      159.69     53.32 o
   2  10   1     6636.50     6413.28    140.12 o
   3  10   1    16618.04    16406.49    257.67 o
   4  10   1      565.14      381.02     78.48 o
   5  10   1     9141.88     8905.65    205.31 o
   6  10   1    14763.23    14816.00    281.33 o
   7  10   1     1929.49     1830.56    137.80 o
   8  10   1     1503.14     1249.08    132.01 o
   9  10   1     3735.70     3817.61    194.26 o
  10  10   1     2856.72     3229.11    196.51 o
  11  10   1      563.16      344.74    148.03 o
  12  10   1      121.72      204.01    163.71 o
 -11  11   1     1389.35     1181.10    232.65 o
 -10  11   1     3528.52     3596.42    241.10 o
  -9  11   1       41.69       81.82    135.82 o
  -8  11   1     5153.85     5247.11    224.19 o
  -7  11   1      952.25      796.67    128.53 o
  -6  11   1        5.71       72.82     99.00 o
  -5  11   1       40.88       51.07     82.30 o
  -4  11   1     1039.85      804.38     97.44 o
  -3  11   1      175.69      136.37     68.32 o
  -2  11   1    12836.98    12503.37    198.08 o
  -1  11   1      462.32      382.59     63.00 o
   0  11   1    10544.44    10163.94    169.64 o
   1  11   1     5285.50     4955.21    129.21 o
   2  11   1     1843.56     2044.60    118.78 o
   3  11   1     4680.89     4607.61    141.69 o
   4  11   1      120.92       91.10     74.87 o
   5  11   1      369.35      281.40     86.46 o
   6  11   1     1348.48     1191.94    127.92 o
   7  11   1      437.92      322.99    110.94 o
   8  11   1     1409.00     1483.43    148.85 o
   9  11   1     2847.52     3631.26    213.01 o
  10  11   1      501.44      253.85    144.42 o
  11  11   1     1833.68     1696.24    189.62 o
 -11  12   1      472.67      601.26    216.90 o
 -10  12   1      571.99      422.41    196.03 o
  -9  12   1     1948.77     2199.92    216.96 o
  -8  12   1      147.63       45.82    131.26 o
  -7  12   1      370.90      276.70    125.05 o
  -6  12   1        1.50       51.75    111.96 o
  -5  12   1        0.80       93.69    106.16 o
  -4  12   1      116.76      124.92     99.28 o
  -3  12   1     4323.73     4284.07    180.21 o
  -2  12   1       36.91       80.39     76.44 o
  -1  12   1     3683.31     3909.60    145.30 o
   0  12   1     1914.39     1843.11    115.78 o
   1  12   1     1078.53      945.86    101.87 o
   2  12   1     4288.56     4399.85    170.87 o
   3  12   1      199.32      179.87     91.30 o
   4  12   1      345.88      266.94     89.19 o
   5  12   1      669.20      556.39    106.03 o
   6  12   1      111.04      131.12     92.94 o
   7  12   1      167.73      191.60    116.12 o
   8  12   1     2098.89     1903.86    168.35 o
   9  12   1      755.56      630.10    148.58 o
  10  12   1      949.95      979.00    175.44 o
  11  12   1       33.11       81.89    162.55 o
 -10  13   1     1315.08     1279.02    237.15 o
  -9  13   1      838.69      544.80    196.71 o
  -8  13   1     2472.09     1973.55    205.85 o
  -7  13   1     8461.83     8238.19    308.95 o
  -6  13   1     2654.82     2978.94    213.01 o
  -5  13   1      205.17       67.91    123.35 o
  -4  13   1     6828.70     6923.78    247.31 o
  -3  13   1     2143.14     2311.00    169.30 o
  -2  13   1       39.15       36.75     84.55 o
  -1  13   1     3192.84     3353.89    182.33 o
   0  13   1     8970.27     8410.42    216.90 o
   1  13   1     1049.74      922.27    120.89 o
   2  13   1       22.63      124.57     94.10 o
   3  13   1     1948.98     1847.54    145.71 o
   4  13   1    13387.41    13364.96    276.08 o
   5  13   1     1276.26     1030.48    128.26 o
   6  13   1        6.28      147.35    103.30 o
   7  13   1     8708.21     8043.59    233.06 o
   8  13   1     2866.18     3291.98    205.58 o
   9  13   1      146.75      203.67    149.33 o
  10  13   1      513.56      563.28    170.94 o
 -10  14   1      223.87      431.75    239.60 o
  -9  14   1     3312.50     3716.50    324.42 o
  -8  14   1     1579.33     1504.37    244.10 o
  -7  14   1      875.51      980.64    190.44 o
  -6  14   1     4214.70     4598.61    285.29 o
  -5  14   1     8735.62     8664.07    325.17 o
  -4  14   1     1913.86     1541.05    181.71 o
  -3  14   1     1822.26     1947.23    190.78 o
  -2  14   1     5717.14     5489.17    246.08 o
  -1  14   1     9348.08     8770.71    282.90 o
   0  14   1     3149.44     3591.24    237.49 o
   1  14   1       40.23       43.16    109.44 o
   2  14   1     7491.97     7728.10    264.08 o
   3  14   1     5781.63     5779.91    233.40 o
   4  14   1      400.09      262.31    126.76 o
   5  14   1     4399.63     4780.46    257.67 o
   6  14   1     5516.40     6219.02    280.99 o
   7  14   1     1653.55     1525.50    167.87 o
   8  14   1      733.45      911.16    167.80 o
   9  14   1     2193.49     2159.97    264.01 o
  10  14   1     2648.04     3160.86    264.35 o
  -9  15   1      983.64      570.85    250.44 o
  -8  15   1     2120.24     2134.60    281.74 o
  -7  15   1     2847.08     2913.34    261.01 o
  -6  15   1      720.93      668.69    185.19 o
  -5  15   1       26.05       68.05    156.01 o
  -4  15   1      727.70      495.36    157.64 o
  -3  15   1     2525.45     2440.89    223.78 o
  -2  15   1      187.27       30.55    140.94 o
  -1  15   1      749.87      819.52    167.46 o
   0  15   1     8205.30     7410.42    311.13 o
   1  15   1     4462.08     5450.99    300.83 o
   2  15   1      736.25      685.53    157.92 o
   3  15   1      619.60      439.38    144.42 o
   4  15   1     1904.84     1489.71    190.65 o
   5  15   1      235.39      203.40    146.19 o
   6  15   1      606.53      813.65    170.26 o
   7  15   1        3.01       92.53    155.26 o
   8  15   1     3658.33     3431.62    256.31 o
   9  15   1     1238.82     1333.70    218.19 o
  -8  16   1       69.56       18.00    227.47 o
  -7  16   1     1183.18      972.46    241.85 o
  -6  16   1      417.72      473.61    196.92 o
  -5  16   1       29.11       91.71    175.17 o
  -4  16   1      299.09       54.68    172.17 o
  -3  16   1       27.86       44.66    171.21 o
  -2  16   1     1707.94     1994.48    225.35 o
  -1  16   1     3177.79     3626.70    326.54 o
   0  16   1       39.40       37.71    159.89 o
   1  16   1     2132.24     2587.83    246.83 o
   2  16   1     1516.82     1517.12    206.74 o
   3  16   1        4.70       42.21    151.85 o
   4  16   1      660.76      545.48    177.83 o
   5  16   1        4.67      162.55    160.78 o
   6  16   1        1.16      138.89    172.58 o
   7  16   1     1137.29      732.44    209.12 o
   8  16   1      199.15      133.64    200.12 o
  -7  17   1     3943.55     4039.49    355.38 o
  -6  17   1     4497.48     4535.47    368.68 o
  -5  17   1       66.80      148.64    202.78 o
  -4  17   1     3519.61     3807.93    341.74 o
  -3  17   1     5216.01     6463.67    443.34 o
  -2  17   1      885.54      571.25    229.58 o
  -1  17   1      817.05      656.21    231.35 o
   0  17   1     1233.43     1742.33    264.90 o
   1  17   1     6408.21     7022.93    345.83 o
   2  17   1      863.66      909.45    206.53 o
   3  17   1      870.22     1191.26    207.56 o
   4  17   1     5742.85     6048.49    331.86 o
   5  17   1     4675.06     5593.49    347.81 o
   6  17   1      118.25      101.25    193.44 o
   7  17   1     2578.02     2700.06    278.13 o
  -6  18   1     3933.39     4623.83    397.25 o
  -5  18   1     2987.22     1844.20    346.79 o
  -4  18   1     1303.91     1283.45    303.97 o
  -3  18   1     1199.20     1053.39    261.49 o
  -2  18   1     5531.59     7497.29    653.96 o
  -1  18   1     4409.49     5442.12    440.34 o
   0  18   1       80.00       78.75    221.94 o
   1  18   1     1179.37     1636.51    282.90 o
   2  18   1     3402.74     3686.63    318.22 o
   3  18   1     1539.98     1204.90    226.78 o
   4  18   1      111.50      176.74    191.12 o
   5  18   1     3771.14     3645.24    302.88 o
   6  18   1     4987.34     5349.26    351.90 o
  -4  19   1       61.43      224.26    342.49 o
  -3  19   1       58.35        0.00    301.17 o
  -2  19   1     1290.13     2092.05    469.52 o
  -1  19   1      161.85       39.21    344.68 o
   0  19   1     2480.90     2586.26    358.11 o
   1  19   1     1384.21     1460.80    300.97 o
   2  19   1        8.91      104.19    235.37 o
   3  19   1      561.93      415.59    240.28 o
   4  19   1       58.12       21.75    207.49 o
  -2  20   1      163.34       15.14    608.48 o
  -1  20   1     5082.78     7146.27    708.10 o
   0  20   1      468.66      551.41    310.65 o
   1  20   1     1233.03     1339.36    336.36 o
   2  20   1     1527.99     2245.47    367.79 o
 -14   0   2      999.15      608.69    312.22 o
 -13   0   2     3190.72     3157.99    323.95 o
 -12   0   2       44.88      126.28    189.69 o
 -11   0   2     6297.50     6059.06    305.54 o
 -10   0   2    14626.06    14087.92    397.86 o
  -9   0   2       16.74      125.53    121.78 o
  -8   0   2    17805.26    17924.90    410.07 o
  -7   0   2    22882.51    22386.25    406.59 o
  -6   0   2     3252.49     3196.31    135.62 o
  -5   0   2       58.97       29.12     54.68 o
  -4   0   2     2114.80     2403.93     98.87 o
  -3   0   2    27326.59    27451.04    360.36 o
  -2   0   2    43907.19    43724.63    539.34 o
  -1   0   2      679.91      714.92     58.43 o
   0   0   2    32411.86    32028.30    383.75 o
   1   0   2    55359.85    55283.09    953.91 o
   2   0   2     1983.51     2057.48    108.21 o
   3   0   2    10821.15    10853.97    220.44 o
   4   0   2    21674.49    23271.29    326.40 o
   5   0   2     5164.68     5454.06    151.03 o
   6   0   2     1533.97     1568.67    120.82 o
   7   0   2     1504.82     1809.43    162.49 o
   8   0   2    17090.00    17969.22    419.95 o
   9   0   2    11366.45    11380.77    344.95 o
  10   0   2      774.91      729.03    190.51 o
  11   0   2     7067.14     6503.49    407.27 o
  12   0   2     4524.38     4217.79    413.47 o
  13   0   2        2.70       23.59    288.22 o
 -14   1   2       21.66       66.41    197.40 o
 -13   1   2     4672.52     4547.88    270.29 o
 -12   1   2     2401.93     1886.41    184.92 o
 -11   1   2      292.80      100.57    119.05 o
 -10   1   2      457.98      399.91    109.51 o
  -9   1   2      771.78      686.56    105.01 o
  -8   1   2     9248.36     9069.57    198.62 o
  -7   1   2     7374.68     7700.96    154.23 o
  -6   1   2       17.01      103.64     47.25 o
  -5   1   2    30896.11    31074.12    309.22 o
  -4   1   2    16302.00    16844.03    180.89 o
  -3   1   2     1659.95     1829.88     59.93 o
  -2   1   2    61107.27    61377.20    503.68 o
  -1   1   2     9444.57     9365.15    124.85 o
   0   1   2     3289.46     3287.41     48.75 o
   1   1   2     1435.27     1461.14     51.28 o
   2   1   2     2807.49     2739.40     79.37 o
   3   1   2    41299.00    42769.36    366.43 o
   4   1   2    13471.95    13842.52    165.21 o
   5   1   2     4179.13     3821.98     94.23 o
   6   1   2    24178.16    23826.39    291.01 o
   7   1   2     1490.34     1552.64    106.16 o
   8   1   2        3.42       48.68     81.14 o
   9   1   2     3442.41     3802.34    197.87 o
  10   1   2     3929.73     4228.16    225.76 o
  11   1   2     6272.83     6405.65    272.33 o
  12   1   2      711.08      545.89    193.51 o
  13   1   2     2159.63     1797.97    248.47 o
 -14   2   2      685.17      342.49    212.46 o
 -13   2   2       41.31      135.01    171.76 o
 -12   2   2      915.61      764.42    151.10 o
 -11   2   2     1565.71     1266.20    147.62 o
 -10   2   2      978.99      768.72    117.48 o
  -9   2   2      141.87       83.80     84.69 o
  -8   2   2      161.53      198.21     77.25 o
  -7   2   2      313.22      260.13     61.57 o
  -6   2   2     4285.55     4589.74    104.53 o
  -5   2   2     1118.37     1167.12     63.96 o
  -4   2   2       83.63       83.87     34.37 o
  -3   2   2     2039.00     2197.74     58.37 o
  -2   2   2    59338.18    60706.46    545.07 o
  -1   2   2     7554.85     8091.39    117.01 o
   0   2   2     2550.13     2676.88     54.68 o
   1   2   2     1937.86     1929.30     40.02 o
   2   2   2      654.98      760.81     37.02 o
   3   2   2      369.36      377.13     34.98 o
   4   2   2     3616.09     4039.22     81.89 o
   5   2   2     8088.61     8943.63    155.39 o
   6   2   2      451.41      387.97     76.44 o
   7   2   2      737.43      719.22     92.60 o
   8   2   2      466.09      253.24     96.89 o
   9   2   2     2873.45     3093.15    180.14 o
  10   2   2       56.66       54.75    113.19 o
  11   2   2       46.48      277.79    152.73 o
  12   2   2      254.30      252.83    165.49 o
  13   2   2      460.95       96.28    205.44 o
 -13   3   2     3080.93     3017.80    242.81 o
 -12   3   2     1167.86     1111.55    159.62 o
 -11   3   2      879.96     1043.71    145.37 o
 -10   3   2      830.59      730.53    123.07 o
  -9   3   2     2096.81     2040.51    131.32 o
  -8   3   2     5781.51     5710.91    152.67 o
  -7   3   2     2601.06     2523.80    112.10 o
  -6   3   2     2859.10     2992.03    101.25 o
  -5   3   2    16024.83    16354.87    191.26 o
  -4   3   2      116.61       69.48     38.05 o
  -3   3   2      783.91      683.21     45.34 o
  -2   3   2    19465.46    19343.01    191.05 o
  -1   3   2       70.60       42.82     25.91 o
   0   3   2    14697.76    15290.98    186.08 o
   1   3   2     2637.57     2732.38     48.00 o
   2   3   2    16787.89    17272.51    167.39 o
   3   3   2    18302.73    18577.09    173.39 o
   4   3   2      874.86      834.79     48.89 o
   5   3   2     3834.68     3780.66     81.28 o
   6   3   2    18935.48    18864.15    255.83 o
   7   3   2     4306.18     3952.07    116.87 o
   8   3   2      154.03      166.92     63.41 o
   9   3   2     8114.44     7946.56    189.01 o
  10   3   2     2584.45     2500.82    189.01 o
  11   3   2     2578.74     2840.32    208.85 o
  12   3   2      571.29      421.25    173.74 o
  13   3   2      541.79      153.21    192.76 o
 -13   4   2     2648.82     3334.05    253.03 o
 -12   4   2      168.26      167.74    136.30 o
 -11   4   2     7447.58     7322.12    223.78 o
 -10   4   2    14287.56    13919.98    284.81 o
  -9   4   2     1880.13     1759.79    132.07 o
  -8   4   2     8863.86     8845.58    191.87 o
  -7   4   2    17999.86    17834.69    266.67 o
  -6   4   2     3959.28     3946.01    108.21 o
  -5   4   2      420.29      383.27     53.66 o
  -4   4   2     2167.76     2240.97     81.96 o
  -3   4   2    22932.82    22963.23    235.44 o
  -2   4   2    33213.22    32845.98    297.76 o
  -1   4   2      706.29      560.07     39.82 o
   0   4   2    66291.50    65823.41    658.67 o
   1   4   2    64961.36    64144.90    550.87 o
   2   4   2      130.46       71.87     24.27 o
   3   4   2    18027.64    18223.89    183.69 o
   4   4   2     7319.46     7506.02    104.66 o
   5   4   2     7012.18     7425.01    106.10 o
   6   4   2     7544.39     7459.45    122.05 o
   7   4   2       23.04       42.00     52.03 o
   8   4   2    20817.19    21450.20    358.24 o
   9   4   2    17234.77    17472.15    308.67 o
  10   4   2       74.27      152.67    119.80 o
  11   4   2     9482.27     8856.01    277.24 o
  12   4   2     4877.22     4919.83    297.70 o
  13   4   2       33.55      216.21    196.85 o
 -13   5   2     3128.45     3427.19    276.90 o
 -12   5   2      501.23      285.63    155.05 o
 -11   5   2       27.14       13.91    116.39 o
 -10   5   2        9.69       88.10    103.50 o
  -9   5   2      530.15      456.23    105.14 o
  -8   5   2     6065.61     6021.01    171.21 o
  -7   5   2     2187.22     2272.61    125.26 o
  -6   5   2     2831.83     2991.35    110.19 o
  -5   5   2     8797.05     8331.74    138.14 o
  -4   5   2     1429.77     1315.43     69.55 o
  -3   5   2     3843.36     3841.14     81.96 o
  -2   5   2     5992.24     6044.20     95.80 o
  -1   5   2     8850.82     9537.39    130.64 o
   0   5   2      975.51     1069.07     56.12 o
   1   5   2      431.24      452.68     37.30 o
   2   5   2        7.01       37.64     27.96 o
   3   5   2    15231.43    16094.40    193.44 o
   4   5   2     9179.68     9393.58    130.30 o
   5   5   2     2333.15     2175.31     77.25 o
   6   5   2    11027.10    10854.11    163.37 o
   7   5   2     1043.43      762.10     69.14 o
   8   5   2     4502.00     4802.07    142.71 o
   9   5   2      371.51      330.29    105.07 o
  10   5   2       76.06      153.76    102.14 o
  11   5   2      764.59      818.97    161.87 o
  12   5   2      247.30      188.87    166.17 o
  13   5   2      377.24       64.30    202.03 o
 -13   6   2       34.25      148.30    191.53 o
 -12   6   2      324.06      147.69    157.37 o
 -11   6   2       25.34       76.16    122.46 o
 -10   6   2      127.66       82.44    109.37 o
  -9   6   2      441.69      349.31    102.00 o
  -8   6   2      826.10      660.37    107.12 o
  -7   6   2      489.16      378.02     90.41 o
  -6   6   2       93.33       34.98     57.28 o
  -5   6   2       35.77       40.50     50.18 o
  -4   6   2     5180.60     5189.70    103.78 o
  -3   6   2     5353.79     5400.46     99.69 o
  -2   6   2       42.20       63.00     36.41 o
  -1   6   2      981.84      942.86     45.68 o
   0   6   2     7153.03     7480.38    118.51 o
   1   6   2     1045.90     1123.76     54.14 o
   2   6   2      929.49      781.06     47.87 o
   3   6   2     4764.37     5060.97     98.73 o
   4   6   2     5336.66     5536.22    114.55 o
   5   6   2     2580.55     2668.08     89.25 o
   6   6   2       25.85       43.23     56.46 o
   7   6   2      257.76      174.08     70.37 o
   8   6   2      438.00      395.88     81.75 o
   9   6   2      350.34      138.82     81.96 o
  10   6   2        0.99      107.32    114.14 o
  11   6   2      481.82      340.04    119.39 o
  12   6   2      253.27      153.28    181.51 o
  13   6   2       80.56      212.06    213.83 o
 -13   7   2     2415.04     2130.31    255.28 o
 -12   7   2     3941.44     4499.67    291.15 o
 -11   7   2       23.75       35.80    140.19 o
 -10   7   2      222.43      195.83    121.44 o
  -9   7   2     3801.68     4147.02    186.69 o
  -8   7   2     5263.81     5031.92    182.19 o
  -7   7   2      802.14      648.71    101.05 o
  -6   7   2      741.58      528.16     81.14 o
  -5   7   2    14468.10    13959.53    194.33 o
  -4   7   2     6287.41     5987.60    117.48 o
  -3   7   2      940.79      924.32     61.30 o
  -2   7   2    10511.14    10385.00    144.83 o
  -1   7   2    14057.78    14130.40    169.58 o
   0   7   2      223.53      285.97     39.41 o
   1   7   2     2080.07     2478.80     70.23 o
   2   7   2    10347.63    10944.45    145.85 o
   3   7   2    21134.95    21527.46    258.90 o
   4   7   2     1551.79     1448.80     82.37 o
   5   7   2     2662.47     2595.60    116.53 o
   6   7   2    14551.61    14767.73    253.38 o
   7   7   2     4264.75     4254.07    144.48 o
   8   7   2       93.96       28.91     77.94 o
   9   7   2     1177.21     1129.49    109.44 o
  10   7   2     4275.05     4042.35    205.31 o
  11   7   2     2013.42     2190.04    171.69 o
  12   7   2      166.47      194.19    184.92 o
  13   7   2     3395.30     3122.13    284.13 o
 -12   8   2      311.56      266.47    195.83 o
 -11   8   2     4602.90     5071.74    287.60 o
 -10   8   2    12620.69    12128.21    346.58 o
  -9   8   2     1097.09      984.32    137.26 o
  -8   8   2     5058.31     5275.89    200.87 o
  -7   8   2     5608.60     5695.70    187.99 o
  -6   8   2     4001.68     4008.40    153.42 o
  -5   8   2       85.26       99.55     60.00 o
  -4   8   2      561.77      463.39     59.73 o
  -3   8   2    13225.74    13035.14    177.96 o
  -2   8   2    17015.25    16655.50    191.33 o
  -1   8   2       21.31       21.07     36.96 o
   0   8   2    14854.26    15008.35    173.87 o
   1   8   2    21888.24    21820.31    232.24 o
   2   8   2     3501.16     3613.67     89.25 o
   3   8   2     8530.29     8564.18    156.96 o
   4   8   2    10109.94     9984.82    177.21 o
   5   8   2     7635.35     7821.24    175.64 o
   6   8   2      925.68      877.00     91.50 o
   7   8   2     1003.54      935.57    100.78 o
   8   8   2     8245.06     8332.83    202.65 o
   9   8   2    11237.37    10883.91    238.38 o
  10   8   2       14.49       71.46    133.85 o
  11   8   2     7334.41     7970.22    266.60 o
  12   8   2     5011.39     4769.48    305.40 o
 -12   9   2     2131.95     2073.51    243.56 o
 -11   9   2      285.86      181.10    165.42 o
 -10   9   2      385.89      380.20    161.67 o
  -9   9   2        4.19       23.52    122.05 o
  -8   9   2      881.47      778.81    126.55 o
  -7   9   2     3735.18     3967.01    193.58 o
  -6   9   2     1362.12     1315.49    117.14 o
  -5   9   2    20553.38    20303.74    292.45 o
  -4   9   2    12077.64    11860.25    187.78 o
  -3   9   2     7681.95     7556.07    137.12 o
  -2   9   2     5013.63     4797.23    101.39 o
  -1   9   2      892.69      826.74     58.30 o
   0   9   2      455.85      409.25     50.73 o
   1   9   2     4187.44     4140.67     98.25 o
   2   9   2      590.40      420.43     60.07 o
   3   9   2     7968.33     7775.01    155.39 o
   4   9   2     2938.83     3349.39    132.76 o
   5   9   2     4219.40     4316.66    144.14 o
   6   9   2     7304.28     7256.53    185.33 o
   7   9   2     1536.67     1281.13    119.26 o
   8   9   2     1051.93      868.20    109.37 o
   9   9   2      656.90      533.00    115.23 o
  10   9   2      266.80      223.17    111.41 o
  11   9   2      289.98      217.03    156.14 o
  12   9   2      791.09      804.45    174.55 o
 -12  10   2      262.37       57.14    221.19 o
 -11  10   2      326.79      354.02    195.28 o
 -10  10   2      893.01      669.51    191.12 o
  -9  10   2      136.86       79.37    149.87 o
  -8  10   2      405.82      274.92    131.94 o
  -7  10   2      606.72      562.32    126.21 o
  -6  10   2      330.18      311.88    110.39 o
  -5  10   2       98.86      119.46     85.64 o
  -4  10   2    10021.79     9852.54    211.31 o
  -3  10   2     1003.70      994.21     77.25 o
  -2  10   2     1259.92     1182.47     80.53 o
  -1  10   2       59.88       78.07     53.73 o
   0  10   2      495.23      439.18     65.80 o
   1  10   2        4.24       72.14     56.66 o
   2  10   2      254.35      246.90     73.03 o
   3  10   2       30.33      116.66     64.23 o
   4  10   2     3470.84     3838.68    159.35 o
   5  10   2      241.04      249.01     80.25 o
   6  10   2      219.47      228.42     92.80 o
   7  10   2     1309.54     1583.60    137.67 o
   8  10   2     1388.11     1310.59    134.26 o
   9  10   2      544.13      409.93    119.94 o
  10  10   2       75.80       78.41    124.64 o
  11  10   2        4.46       57.14    166.24 o
  12  10   2       90.19      195.76    187.17 o
 -11  11   2      856.21      518.96    224.40 o
 -10  11   2      515.25      371.68    185.74 o
  -9  11   2     4447.62     5111.36    306.70 o
  -8  11   2     6112.63     6894.94    314.47 o
  -7  11   2      116.37       54.21    122.73 o
  -6  11   2     6597.16     6147.16    232.10 o
  -5  11   2     6181.02     5940.08    205.58 o
  -4  11   2    16523.81    15999.49    300.97 o
  -3  11   2       36.88       87.41     67.98 o
  -2  11   2     1365.25     1373.38     91.30 o
  -1  11   2    15055.28    14651.40    226.37 o
   0  11   2     7937.64     7910.56    164.46 o
   1  11   2      726.80      660.24     87.75 o
   2  11   2     7435.38     7292.19    183.69 o
   3  11   2     8065.20     8247.94    194.67 o
   4  11   2     2966.29     3170.33    156.62 o
   5  11   2     2365.73     2341.07    145.17 o
   6  11   2     3688.26     3995.24    174.42 o
   7  11   2    10902.77    10647.64    258.01 o
   8  11   2      491.46      409.66    123.62 o
   9  11   2      810.57      771.45    138.28 o
  10  11   2     3935.27     4085.79    211.78 o
  11  11   2     1495.29     1589.53    212.33 o
 -11  12   2     3124.42     3307.73    307.17 o
 -10  12   2     6578.26     7052.79    373.25 o
  -9  12   2     1857.87     2016.37    235.99 o
  -8  12   2     2165.61     2015.55    233.60 o
  -7  12   2     7747.28     7682.55    307.86 o
  -6  12   2     1346.54     1524.35    172.10 o
  -5  12   2        5.14        0.00    111.62 o
  -4  12   2     1294.52     1165.28    129.89 o
  -3  12   2     6923.57     6481.95    193.78 o
  -2  12   2     9621.90     9461.77    191.94 o
  -1  12   2      112.51       66.55     71.12 o
   0  12   2    17626.77    16607.02    291.76 o
   1  12   2    13410.54    13464.78    259.92 o
   2  12   2       95.37       31.71     78.89 o
   3  12   2     2880.13     3235.72    168.14 o
   4  12   2     6362.27     6429.31    185.12 o
   5  12   2     3241.01     3502.12    170.87 o
   6  12   2     1337.18     1278.81    132.76 o
   7  12   2     2075.94     2152.88    154.58 o
   8  12   2     8610.15     8824.03    255.35 o
   9  12   2     4716.89     5157.65    233.87 o
  10  12   2       81.29       59.12    142.71 o
  11  12   2     5526.75     5749.16    310.79 o
 -10  13   2      243.51       54.41    201.56 o
  -9  13   2       48.53      130.23    184.37 o
  -8  13   2      719.18      648.37    188.46 o
  -7  13   2     2846.65     3175.92    260.81 o
  -6  13   2      547.59      501.77    168.08 o
  -5  13   2     6207.68     6050.61    248.13 o
  -4  13   2     1682.39     1798.79    156.89 o
  -3  13   2       81.25       68.80    102.07 o
  -2  13   2     1428.27     1302.68    131.60 o
  -1  13   2      107.46      134.26     88.71 o
   0  13   2       21.76      150.28     89.46 o
   1  13   2      728.08      675.78    103.85 o
   2  13   2      503.33      292.65     99.75 o
   3  13   2     2874.09     3115.72    172.71 o
   4  13   2     2590.62     2933.39    169.58 o
   5  13   2     1059.41      911.84    120.41 o
   6  13   2     5174.69     5228.16    214.65 o
   7  13   2      706.15      786.51    132.35 o
   8  13   2      216.78      283.31    128.87 o
   9  13   2       48.54      176.05    139.51 o
  10  13   2        1.70      167.19    158.12 o
 -10  14   2       66.83       28.57    220.51 o
  -9  14   2      355.72      563.55    219.35 o
  -8  14   2      117.96       96.14    186.83 o
  -7  14   2      326.95      172.71    176.87 o
  -6  14   2     3651.09     3965.03    281.06 o
  -5  14   2       69.88        1.98    148.17 o
  -4  14   2     1977.05     2157.03    186.21 o
  -3  14   2     2834.28     2691.13    201.83 o
  -2  14   2       36.62       13.02    111.41 o
  -1  14   2      716.82      452.34    119.94 o
   0  14   2       54.88       24.61    100.78 o
   1  14   2      149.54      193.78    111.76 o
   2  14   2     2980.68     3446.55    204.28 o
   3  14   2      131.87      135.76    106.57 o
   4  14   2     2467.11     2540.03    170.60 o
   5  14   2     4613.96     4699.59    204.56 o
   6  14   2       94.91       40.91    118.71 o
   7  14   2     3340.85     2891.46    186.62 o
   8  14   2      460.55      375.22    143.05 o
   9  14   2       41.93       79.84    148.64 o
  -9  15   2     6488.92     6571.95    426.36 o
  -8  15   2      877.87      809.97    255.22 o
  -7  15   2      435.46      344.61    207.76 o
  -6  15   2     2551.00     2169.38    239.88 o
  -5  15   2     5453.07     6266.48    427.52 o
  -4  15   2     3635.34     3994.83    357.43 o
  -3  15   2      681.79      454.86    152.19 o
  -2  15   2     3468.46     3778.41    274.04 o
  -1  15   2     8649.22     8479.77    327.36 o
   0  15   2     1746.59     1530.75    170.60 o
   1  15   2       33.39       47.66    112.16 o
   2  15   2    11120.95    11782.45    355.79 o
   3  15   2     3613.95     3874.68    232.78 o
   4  15   2      739.98      622.53    130.78 o
   5  15   2     1006.56      937.41    148.85 o
   6  15   2     4641.90     4803.30    242.53 o
   7  15   2     2889.36     2749.43    219.01 o
   8  15   2      918.00      927.25    176.05 o
   9  15   2      564.16      488.61    182.60 o
  -8  16   2      262.60      158.05    246.49 o
  -7  16   2     2098.09     2145.78    283.99 o
  -6  16   2     1924.85     1618.17    332.27 o
  -5  16   2      282.89      161.12    236.40 o
  -4  16   2     2275.07     2364.25    338.33 o
  -3  16   2     4332.22     4697.34    442.25 o
  -2  16   2     2212.97     2705.86    315.29 o
  -1  16   2      186.47      208.37    164.87 o
   0  16   2     3828.94     4206.88    289.10 o
   1  16   2     9006.51     8955.22    341.74 o
   2  16   2      560.10      309.29    162.62 o
   3  16   2      566.37      369.02    155.19 o
   4  16   2     3754.65     4081.29    257.74 o
   5  16   2     1542.03     1457.93    195.42 o
   6  16   2      506.72      558.16    180.01 o
   7  16   2      333.35      326.33    186.96 o
   8  16   2     2719.36     3391.73    268.51 o
  -7  17   2      605.27      387.90    298.17 o
  -6  17   2       88.00      129.07    268.79 o
  -5  17   2     1325.36     1168.08    303.70 o
  -4  17   2     1342.90     1098.67    425.54 o
  -3  17   2       71.98       42.55    438.70 o
  -2  17   2      549.66      816.52    301.92 o
  -1  17   2      285.96      465.64    189.15 o
   0  17   2       85.43      166.44    170.80 o
   1  17   2        9.71       76.84    175.37 o
   2  17   2      155.57       69.82    168.28 o
   3  17   2     2070.50     2170.13    234.83 o
   4  17   2     1379.66     1614.35    215.74 o
   5  17   2     2223.84     2274.04    253.38 o
   6  17   2     2823.55     3354.09    272.54 o
   7  17   2       23.57      190.71    196.17 o
  -6  18   2     3086.83     3148.45    444.84 o
  -5  18   2        6.42      169.30    289.99 o
  -4  18   2      131.85      592.73    480.16 o
  -3  18   2      875.98      433.45    488.14 o
  -2  18   2      439.25      728.01    322.45 o
  -1  18   2      999.97     1170.26    324.70 o
   0  18   2        8.37        0.00    196.03 o
   1  18   2      682.88      766.74    221.74 o
   2  18   2     1455.56     1469.73    239.33 o
   3  18   2       86.48       25.77    188.87 o
   4  18   2     1153.04     1025.84    225.62 o
   5  18   2     4251.14     4587.36    338.27 o
   6  18   2      325.09      112.23    222.76 o
  -4  19   2      870.81      925.82    615.37 o
  -3  19   2      280.92       61.98    573.98 o
  -2  19   2     1384.06     1205.99    377.20 o
  -1  19   2     6322.72     6837.46    570.03 o
   0  19   2     1831.87     2608.35    413.00 o
   1  19   2     1903.59     2234.63    331.65 o
   2  19   2     3719.40     4855.46    369.15 o
   3  19   2      956.97     1018.82    263.06 o
   4  19   2        7.59      170.46    221.33 o
  -1  20   2       20.64      354.49    367.04 o
   0  20   2     1068.18     1487.46    395.61 o
 -13   1   3     1563.75     1378.43    239.47 o
 -12   1   3     1002.09      976.07    178.64 o
 -11   1   3     1448.14     1502.73    166.24 o
 -10   1   3     8213.96     7871.22    234.08 o
  -9   1   3     4330.19     4573.45    184.24 o
  -8   1   3     2120.60     1999.46    127.71 o
  -7   1   3     8948.66     8833.65    167.67 o
  -6   1   3     2055.55     2130.03     96.41 o
  -5   1   3      764.91      657.03     58.03 o
  -4   1   3      228.09      207.62     40.77 o
  -3   1   3     6401.44     6285.64     96.96 o
  -2   1   3    27379.49    27732.64    290.74 o
  -1   1   3     4092.19     4204.63     89.80 o
   0   1   3    11080.74    11046.94    110.26 o
   1   1   3    12985.60    13409.82    154.92 o
   2   1   3     5387.48     5325.12    122.05 o
   3   1   3      465.69      322.72     54.48 o
   4   1   3     1146.34      961.89     57.48 o
   5   1   3     3954.26     4281.20     87.82 o
   6   1   3     1528.09     1842.22     90.21 o
   7   1   3       62.33       62.05     69.21 o
   8   1   3      790.98      655.19    103.64 o
   9   1   3     3899.50     4109.38    190.92 o
  10   1   3       10.42       55.43    123.28 o
  11   1   3     6173.68     6329.62    273.63 o
  12   1   3     4433.41     4457.19    310.51 o
  13   1   3      414.50      395.81    219.08 o
 -13   2   3     4575.87     4855.32    342.70 o
 -12   2   3     7129.03     7485.97    330.97 o
 -11   2   3     2626.58     2464.89    209.87 o
 -10   2   3        3.13       23.25    101.94 o
  -9   2   3      145.65      120.28     94.10 o
  -8   2   3     7552.47     7164.00    182.12 o
  -7   2   3    13467.71    13238.75    212.33 o
  -6   2   3        0.82       17.66     49.98 o
  -5   2   3    37196.74    38463.27    372.50 o
  -4   2   3    31188.49    31070.03    303.49 o
  -3   2   3      297.17      210.56     36.41 o
  -2   2   3    24577.57    24925.94    265.31 o
  -1   2   3     4227.08     4087.97     84.28 o
   0   2   3    17981.23    18211.62    170.05 o
   1   2   3     2575.47     2460.94     52.30 o
   2   2   3     2482.64     2680.76     65.73 o
   3   2   3    36012.65    37167.48    381.77 o
   4   2   3    14122.50    12920.32    153.62 o
   5   2   3     1553.83     1841.34     75.82 o
   6   2   3    33302.39    32917.98    402.97 o
   7   2   3    11925.74    12015.78    255.08 o
   8   2   3     1152.00      989.16    119.26 o
   9   2   3     5236.55     5506.49    215.87 o
  10   2   3     1805.87     1493.73    168.01 o
  11   2   3     5461.09     4973.01    247.38 o
  12   2   3     2085.87     1925.68    216.35 o
  13   2   3      531.44      368.27    214.03 o
 -13   3   3     1994.14     1728.56    240.83 o
 -12   3   3     1393.90     1696.85    209.26 o
 -11   3   3     2444.65     2471.71    215.94 o
 -10   3   3     6336.29     6465.92    257.06 o
  -9   3   3     4501.58     4652.61    188.94 o
  -8   3   3     1005.58      887.77    105.82 o
  -7   3   3     7321.18     7237.16    148.85 o
  -6   3   3      544.25      455.48     60.96 o
  -5   3   3     1195.40     1073.44     65.87 o
  -4   3   3       62.74       83.46     37.71 o
  -3   3   3     1798.67     1661.26     62.05 o
  -2   3   3     8084.06     7571.07    118.91 o
  -1   3   3    16458.90    17322.96    219.28 o
   0   3   3    13854.57    13932.60    148.44 o
   1   3   3    17753.94    17411.88    175.58 o
   2   3   3      344.06      330.29     39.21 o
   3   3   3     2362.66     2394.11     69.34 o
   4   3   3     7471.83     8261.85    124.64 o
   5   3   3     1067.56     1202.65     69.96 o
   6   3   3     4454.43     4714.11    145.92 o
   7   3   3     2279.10     2657.58    167.19 o
   8   3   3     6155.61     6066.08    202.51 o
   9   3   3     3425.46     3795.79    195.21 o
  10   3   3      661.14      481.80    139.44 o
  11   3   3     3391.50     3789.11    232.24 o
  12   3   3     4148.56     4101.74    275.67 o
  13   3   3       17.94      118.44    191.87 o
 -13   4   3      263.32      303.36    202.99 o
 -12   4   3      393.27      294.63    181.37 o
 -11   4   3        5.43       42.55    150.83 o
 -10   4   3      369.81      198.49    129.62 o
  -9   4   3       45.51       77.39     94.85 o
  -8   4   3       10.45       89.60     83.32 o
  -7   4   3      126.87       82.78     62.59 o
  -6   4   3      137.39      149.94     53.18 o
  -5   4   3     1142.83     1147.90     69.41 o
  -4   4   3     5199.26     5451.94    104.87 o
  -3   4   3     2195.53     2569.28     76.84 o
  -2   4   3       19.20       38.87     32.18 o
  -1   4   3     1153.16     1145.10     54.82 o
   0   4   3       18.52       31.43     28.71 o
   1   4   3      263.14      225.83     26.66 o
   2   4   3     1047.31     1046.85     48.89 o
   3   4   3      290.12      247.58     44.59 o
   4   4   3     1183.81     1480.43     68.94 o
   5   4   3      239.61      168.42     62.93 o
   6   4   3       20.48       72.75     75.41 o
   7   4   3       95.29       75.00     93.55 o
   8   4   3        4.44        0.00     99.28 o
   9   4   3      755.74      499.86    125.12 o
  10   4   3      263.51      189.15    131.53 o
  11   4   3        7.95       82.50    141.01 o
  12   4   3       14.82      108.76    178.37 o
  13   4   3       66.87       45.00    205.58 o
 -13   5   3     3924.32     4033.76    301.17 o
 -12   5   3      111.26       51.68    174.96 o
 -11   5   3     1367.48     1346.31    189.21 o
 -10   5   3    12152.29    12208.54    347.74 o
  -9   5   3     1611.26     1336.63    155.60 o
  -8   5   3     1055.68      910.82    109.71 o
  -7   5   3     6430.17     6442.67    145.17 o
  -6   5   3    19500.89    19128.23    234.15 o
  -5   5   3     5185.82     5226.93    117.89 o
  -4   5   3      227.08      150.28     46.98 o
  -3   5   3     9274.62     9066.02    132.89 o
  -2   5   3    31220.10    31865.75    301.58 o
  -1   5   3     2862.58     2944.98     80.87 o
   0   5   3      564.14      344.81     43.84 o
   1   5   3    36695.82    38998.11    389.95 o
   2   5   3     8484.33     8385.13    105.82 o
   3   5   3     1961.08     2029.39     65.66 o
   4   5   3     2643.15     2695.42     68.87 o
   5   5   3     7424.26     7533.09    180.42 o
   6   5   3     3790.04     4190.18    165.96 o
   7   5   3      251.91      150.96     95.25 o
   8   5   3     4205.69     4856.35    210.35 o
   9   5   3    10794.89    11261.86    300.90 o
  10   5   3       85.54      129.21    133.03 o
  11   5   3      965.54     1117.28    175.44 o
  12   5   3     3599.31     3312.50    268.92 o
  13   5   3     1208.79     1166.85    230.53 o
 -13   6   3     3870.71     4193.86    310.04 o
 -12   6   3     3711.63     4050.26    303.01 o
 -11   6   3      815.73      655.05    171.76 o
 -10   6   3      303.07      103.64    143.12 o
  -9   6   3     2358.10     2507.98    199.03 o
  -8   6   3    12058.13    11755.72    313.79 o
  -7   6   3     8435.41     8301.19    192.62 o
  -6   6   3       47.88       33.48     60.41 o
  -5   6   3    24220.29    22564.89    264.90 o
  -4   6   3    20890.33    20474.89    240.49 o
  -3   6   3     1483.43     1623.42     74.66 o
  -2   6   3     5434.05     4918.12     93.69 o
  -1   6   3    15677.66    15761.53    197.46 o
   0   6   3      123.13       38.52     39.68 o
   1   6   3     3998.47     4123.90     89.94 o
   2   6   3       38.08       45.82     32.32 o
   3   6   3    23414.67    22858.16    215.26 o
   4   6   3    17217.71    17368.65    239.88 o
   5   6   3      397.27      292.45     56.05 o
   6   6   3    28612.60    28331.37    368.40 o
   7   6   3     8846.10     8813.74    241.78 o
   8   6   3      455.18      388.31    125.60 o
   9   6   3      148.58      123.41    128.46 o
  10   6   3     2810.53     2682.40    221.74 o
  11   6   3     2779.66     2852.25    236.06 o
  12   6   3      902.41      739.19    196.03 o
  13   6   3      557.20      490.73    230.87 o
 -13   7   3     1855.72     1555.37    253.99 o
 -12   7   3     1370.54     1246.90    227.94 o
 -11   7   3      764.25      628.39    180.28 o
 -10   7   3     9499.90     9145.39    308.67 o
  -9   7   3     1600.48     1767.90    177.62 o
  -8   7   3      906.74      717.78    140.19 o
  -7   7   3      964.10      782.36    110.94 o
  -6   7   3      632.95      694.81     81.00 o
  -5   7   3       18.20       81.07     56.12 o
  -4   7   3      455.68      306.83     57.48 o
  -3   7   3     2410.30     2458.14     88.23 o
  -2   7   3    15828.08    15197.84    184.71 o
  -1   7   3     2613.08     2817.48     90.69 o
   0   7   3    10982.92    10953.66    165.69 o
   1   7   3    26084.61    26359.33    282.63 o
   2   7   3     2680.85     2809.36     95.19 o
   3   7   3     6196.91     6149.95    107.12 o
   4   7   3     1565.74     1374.07     67.09 o
   5   7   3      667.55      619.94     63.55 o
   6   7   3     3416.81     3704.56    151.64 o
   7   7   3      935.20      659.62     98.05 o
   8   7   3     3037.40     3048.08    203.26 o
   9   7   3    10215.70     9811.35    292.65 o
  10   7   3     1160.15     1270.15    193.44 o
  11   7   3     3967.48     3667.81    255.83 o
  12   7   3     2519.43     2027.55    231.08 o
 -12   8   3      433.37      285.49    219.08 o
 -11   8   3     1363.33     1406.32    225.22 o
 -10   8   3       76.84      148.44    154.85 o
  -9   8   3     2084.92     2115.78    198.55 o
  -8   8   3      898.77      739.26    139.57 o
  -7   8   3      367.22      282.63    120.01 o
  -6   8   3       56.69       78.21     74.46 o
  -5   8   3     1743.08     1884.29    108.76 o
  -4   8   3      155.28      110.46     60.07 o
  -3   8   3     2186.57     2071.80     97.10 o
  -2   8   3        2.70       14.25     49.16 o
  -1   8   3     5562.14     5950.72    124.17 o
   0   8   3     4435.36     4733.34    117.96 o
   1   8   3       33.33       43.16     48.82 o
   2   8   3     1521.72     1494.07     79.50 o
   3   8   3      404.04      352.11     59.53 o
   4   8   3       54.60      111.48     55.57 o
   5   8   3        3.11        7.02     57.68 o
   6   8   3      144.77      180.49     59.59 o
   7   8   3      563.10      498.84    104.46 o
   8   8   3     1783.83     1516.91    136.64 o
   9   8   3      161.72      125.80    145.23 o
  10   8   3     1779.57     1756.45    212.60 o
  11   8   3     1841.26     1512.75    221.06 o
  12   8   3       44.64      123.48    195.15 o
 -12   9   3      233.54       57.07    219.49 o
 -11   9   3     1394.93     1023.53    228.62 o
 -10   9   3     3931.87     3925.89    288.01 o
  -9   9   3     2563.83     2218.40    222.69 o
  -8   9   3       61.06      177.35    139.57 o
  -7   9   3     8145.37     7260.96    278.47 o
  -6   9   3     7014.74     6472.20    221.47 o
  -5   9   3     3418.09     3630.17    152.26 o
  -4   9   3     3426.53     3612.04    132.01 o
  -3   9   3     4411.17     4347.89    126.96 o
  -2   9   3     5960.61     5907.21    137.87 o
  -1   9   3     1236.88     1128.60     83.53 o
   0   9   3     3079.09     3193.72    115.30 o
   1   9   3     9402.00     9041.00    174.49 o
   2   9   3     5973.43     5875.71    142.71 o
   3   9   3        1.47       52.03     58.91 o
   4   9   3     7893.67     7771.67    169.85 o
   5   9   3     3732.46     3690.45    131.39 o
   6   9   3     3827.26     4405.91    155.87 o
   7   9   3     1890.70     1852.11    155.05 o
   8   9   3     6388.23     6491.70    223.85 o
   9   9   3     5180.13     5294.64    249.63 o
  10   9   3      409.47      411.50    186.15 o
  11   9   3     1120.59      921.73    226.51 o
  12   9   3     1786.52     2213.22    265.51 o
 -12  10   3     4367.78     4525.78    354.02 o
 -11  10   3      786.33      602.82    222.15 o
 -10  10   3       96.22      211.44    188.74 o
  -9  10   3      891.97      674.01    186.49 o
  -8  10   3     5749.39     6122.68    306.56 o
  -7  10   3     9401.42     8600.18    307.86 o
  -6  10   3       57.24      121.30    111.96 o
  -5  10   3     8619.18     8202.66    229.99 o
  -4  10   3    20126.74    19480.13    300.49 o
  -3  10   3        2.04      120.07     72.28 o
  -2  10   3     4176.28     4034.17    133.71 o
  -1  10   3     9023.48     8748.55    173.26 o
   0  10   3     9259.40     9497.16    180.69 o
   1  10   3     1398.75     1354.50     96.55 o
   2  10   3     2146.35     2331.86    115.03 o
   3  10   3    11027.61    11325.13    214.03 o
   4  10   3    14256.92    14123.51    245.88 o
   5  10   3     1182.86      979.21    106.51 o
   6  10   3     2347.83     2406.73    136.03 o
   7  10   3     7735.30     7521.15    201.83 o
   8  10   3       49.06      246.63    131.32 o
   9  10   3     1059.77      837.52    151.64 o
  10  10   3     1468.43     1250.79    224.12 o
  11  10   3     2652.40     2924.32    293.81 o
 -11  11   3      395.49      240.97    217.58 o
 -10  11   3     4904.56     4943.21    334.18 o
  -9  11   3     1359.52      997.27    205.92 o
  -8  11   3     1972.25     1971.91    226.72 o
  -7  11   3     1821.20     1808.00    196.92 o
  -6  11   3       46.81       96.48    114.48 o
  -5  11   3     1142.33     1050.80    127.92 o
  -4  11   3       79.20       63.89     93.41 o
  -3  11   3     1045.05     1016.98    103.98 o
  -2  11   3     5028.13     4902.78    142.92 o
  -1  11   3      232.44      113.87     73.30 o
   0  11   3     4134.76     4211.38    132.76 o
   1  11   3     9908.96     9950.72    203.19 o
   2  11   3      929.60      723.17     95.60 o
   3  11   3     2828.41     3323.27    152.87 o
   4  11   3      405.40      355.72     83.12 o
   5  11   3      973.51      631.26     97.64 o
   6  11   3       10.70       64.43     88.10 o
   7  11   3       21.81      100.85     95.87 o
   8  11   3     1837.44     1738.86    138.35 o
   9  11   3     7595.61     8150.09    288.22 o
  10  11   3       29.54       38.52    153.96 o
  11  11   3     1872.06     1343.86    263.54 o
 -11  12   3     1957.42     2434.68    292.45 o
 -10  12   3        0.54      128.39    204.35 o
  -9  12   3     2380.98     2338.61    260.54 o
  -8  12   3     1266.35      774.79    192.55 o
  -7  12   3       42.57       57.28    152.33 o
  -6  12   3      438.21      287.54    170.60 o
  -5  12   3        1.39       23.86    126.62 o
  -4  12   3      154.12      121.03    113.26 o
  -3  12   3      210.19      114.82     95.05 o
  -2  12   3        8.67       52.37     80.53 o
  -1  12   3     3352.07     3261.63    148.64 o
   0  12   3     3839.40     3705.11    155.53 o
   1  12   3        0.79       21.61     78.89 o
   2  12   3     2221.15     2317.20    135.89 o
   3  12   3      192.73       45.27     83.19 o
   4  12   3       28.36       61.43     90.35 o
   5  12   3        4.30       72.41     93.00 o
   6  12   3      470.76      473.34    109.23 o
   7  12   3      587.11      525.64    116.87 o
   8  12   3      328.04      192.08    113.32 o
   9  12   3      610.75      341.27    162.35 o
  10  12   3     1938.45     1960.05    211.44 o
 -10  13   3     1884.70     2082.03    278.67 o
  -9  13   3     1523.30     1145.99    229.85 o
  -8  13   3      239.24      147.21    187.30 o
  -7  13   3     2447.46     2435.30    279.97 o
  -6  13   3     2109.56     1765.45    247.65 o
  -5  13   3     1072.56     1250.99    189.49 o
  -4  13   3       17.19       75.21    133.98 o
  -3  13   3     7611.76     7662.23    283.17 o
  -2  13   3     4348.82     4321.37    221.53 o
  -1  13   3       92.21       74.94     85.98 o
   0  13   3     3406.45     3474.30    160.03 o
   1  13   3     5164.80     5168.70    184.65 o
   2  13   3     1345.26     1552.64    130.78 o
   3  13   3     1033.92      905.09    116.53 o
   4  13   3     4193.85     5055.92    207.21 o
   5  13   3     5610.48     5520.06    197.12 o
   6  13   3      239.00      241.58    111.21 o
   7  13   3      960.95      763.54    131.73 o
   8  13   3     4029.76     3826.89    243.08 o
   9  13   3     1946.65     1632.76    198.28 o
  10  13   3     1299.28     1249.42    201.15 o
  -9  14   3     2968.80     2951.39    305.13 o
  -8  14   3     5430.24     5625.61    370.59 o
  -7  14   3     4608.56     4144.36    350.88 o
  -6  14   3      268.47      223.65    213.01 o
  -5  14   3     8382.47     7307.53    363.56 o
  -4  14   3     8530.92     8374.15    362.13 o
  -3  14   3        2.07       49.78    136.37 o
  -2  14   3     3136.05     3569.76    246.97 o
  -1  14   3     5947.02     5712.07    224.06 o
   0  14   3     2251.64     2249.56    161.94 o
   1  14   3     1101.17      802.47    117.62 o
   2  14   3     4586.58     4502.87    203.12 o
   3  14   3     9100.11     8884.65    242.88 o
   4  14   3     6433.53     6394.74    223.10 o
   5  14   3       98.17       96.07    117.76 o
   6  14   3     6807.63     7062.68    224.67 o
   7  14   3     5097.39     5412.39    226.78 o
   8  14   3      105.68      144.76    138.55 o
   9  14   3      988.79      978.66    196.37 o
  -9  15   3      539.80      246.90    243.49 o
  -8  15   3      813.89      697.33    274.04 o
  -7  15   3     1252.86     1557.21    277.65 o
  -6  15   3        0.74      203.87    215.81 o
  -5  15   3      337.46      210.62    259.85 o
  -4  15   3      620.15      199.51    194.33 o
  -3  15   3      130.78       27.75    153.21 o
  -2  15   3     2942.25     3208.11    266.33 o
  -1  15   3     3721.11     4273.84    283.45 o
   0  15   3     2466.73     2404.00    193.17 o
   1  15   3     3429.92     3725.97    202.78 o
   2  15   3        0.74       59.66    122.26 o
   3  15   3      295.26      333.36    125.39 o
   4  15   3      156.70       91.44    126.21 o
   5  15   3      230.77      218.46    129.69 o
   6  15   3      445.87      407.47    140.12 o
   7  15   3      721.59      514.80    147.55 o
   8  15   3     1564.76     1667.13    187.10 o
  -8  16   3      531.11       97.57    256.65 o
  -7  16   3       21.33       64.37    244.99 o
  -6  16   3      266.81       93.75    313.72 o
  -5  16   3        0.21      363.43    268.31 o
  -4  16   3      235.23      214.37    200.12 o
  -3  16   3     3311.50     3078.62    320.95 o
  -2  16   3      777.38      657.92    200.87 o
  -1  16   3     1235.17      715.60    188.80 o
   0  16   3     2578.17     2687.31    263.60 o
   1  16   3       71.30       54.34    139.85 o
   2  16   3     2054.05     1871.82    183.69 o
   3  16   3       11.52       32.66    134.12 o
   4  16   3      287.40      126.82    145.44 o
   5  16   3       54.58      120.35    145.37 o
   6  16   3      637.23      535.18    159.35 o
   7  16   3      194.22       53.80    164.87 o
  -7  17   3     1609.96     1231.76    358.65 o
  -6  17   3     8082.41     7264.64    748.60 o
  -5  17   3     1112.22      869.91    441.02 o
  -4  17   3     2578.57     2513.44    397.93 o
  -3  17   3     5854.69     5934.62    479.82 o
  -2  17   3     1914.39     1918.73    281.60 o
  -1  17   3      123.52      284.13    213.08 o
   0  17   3      838.64      431.00    221.33 o
   1  17   3     2417.11     2350.07    270.76 o
   2  17   3     5781.78     6095.00    355.18 o
   3  17   3       47.90      127.64    165.76 o
   4  17   3     2766.66     2872.50    253.17 o
   5  17   3     7790.87     7952.63    334.65 o
   6  17   3      974.18     1080.73    212.19 o
  -5  18   3     2080.75     1368.61    601.12 o
  -4  18   3     2097.24     1442.11    591.51 o
  -3  18   3     1103.96      639.64    337.24 o
  -2  18   3     1423.44     1570.57    359.61 o
  -1  18   3     3771.88     4465.58    381.50 o
   0  18   3     1581.00     1565.19    277.10 o
   1  18   3       60.97      113.87    219.90 o
   2  18   3     2084.16     2089.05    277.04 o
   3  18   3     4447.94     4999.74    364.11 o
   4  18   3     2688.61     3113.94    322.92 o
   5  18   3       28.71      283.24    211.58 o
  -3  19   3        3.26      131.46    313.51 o
  -2  19   3     1814.22     1855.11    405.70 o
  -1  19   3      124.16      167.80    251.88 o
   0  19   3      545.22      445.86    260.19 o
   1  19   3     1664.05     2005.19    327.83 o
   2  19   3      251.43      441.29    255.01 o
   3  19   3      383.73      569.96    243.83 o
 -13   0   4     1806.26     1508.53    383.61 o
 -12   0   4     6635.48     7321.85    509.62 o
 -11   0   4      415.70      524.34    238.85 o
 -10   0   4    16257.64    16009.31    571.94 o
  -9   0   4    16502.43    16894.56    565.87 o
  -8   0   4      494.48      469.93    132.21 o
  -7   0   4    17896.11    18329.24    405.97 o
  -6   0   4     3573.10     3604.33    163.51 o
  -5   0   4    10761.64    11028.39    230.33 o
  -4   0   4     6088.78     6381.44    159.21 o
  -3   0   4     5930.77     6207.77    152.53 o
  -2   0   4    20587.27    20273.13    338.13 o
  -1   0   4    31715.21    32047.73    421.59 o
   0   0   4     4763.13     4543.65    122.60 o
   1   0   4    52373.91    53048.26    676.87 o
   2   0   4    13363.72    13536.58    304.58 o
   3   0   4     6723.77     8021.77    272.33 o
   4   0   4     5706.98     5281.68    177.89 o
   5   0   4     1043.31      680.49    100.91 o
   6   0   4     5296.96     5491.97    150.14 o
   7   0   4     8051.17     7654.87    245.67 o
   8   0   4     6819.87     6822.67    275.94 o
   9   0   4    19811.28    19602.32    527.07 o
  10   0   4     6919.80     6706.07    344.06 o
  11   0   4     2771.97     3053.53    340.45 o
  12   0   4     8818.50     8925.49    510.02 o
  13   0   4      343.42      237.56    297.01 o
 -13   1   4     1140.18     1589.05    279.15 o
 -12   1   4     2410.82     2268.59    256.10 o
 -11   1   4      277.69      287.13    156.96 o
 -10   1   4      126.28       98.94    132.14 o
  -9   1   4        0.33       29.93    100.50 o
  -8   1   4     4970.23     5004.99    157.71 o
  -7   1   4     6858.80     6714.18    165.69 o
  -6   1   4       47.15       52.84     53.32 o
  -5   1   4     6505.34     6527.22    122.53 o
  -4   1   4     9247.75     8866.58    134.05 o
  -3   1   4        8.39       41.32     34.84 o
  -2   1   4     1977.77     2047.26     78.89 o
  -1   1   4     8931.15     8968.59    121.98 o
   0   1   4    10105.44    10303.51    120.14 o
   1   1   4       35.42       21.07     27.68 o
   2   1   4     2045.88     2454.80     86.73 o
   3   1   4    14979.48    15162.72    261.56 o
   4   1   4    12294.75    11735.26    208.99 o
   5   1   4      215.54      193.17     42.55 o
   6   1   4    10868.67    10689.17    154.85 o
   7   1   4    10761.36    10853.97    210.76 o
   8   1   4      630.11      513.37    100.50 o
   9   1   4      347.15      189.15    110.26 o
  10   1   4      184.02      298.38    128.67 o
  11   1   4     1569.37     1532.19    189.49 o
  12   1   4     2415.84     2347.88    227.26 o
  13   1   4        6.68      143.33    203.06 o
 -13   2   4        4.28        5.93    212.46 o
 -12   2   4       84.95      115.64    183.35 o
 -11   2   4      509.43      351.15    169.10 o
 -10   2   4      275.21      164.33    128.73 o
  -9   2   4       13.04       52.16    113.12 o
  -8   2   4        1.97       73.84     80.73 o
  -7   2   4       19.64       14.05     65.93 o
  -6   2   4       15.95       59.53     53.46 o
  -5   2   4      832.63      743.35     63.48 o
  -4   2   4      487.16      390.84     49.50 o
  -3   2   4       31.80       39.27     35.46 o
  -2   2   4      239.37      169.92     43.30 o
  -1   2   4     1457.05     1572.07     64.64 o
   0   2   4       69.00       49.09     20.52 o
   1   2   4      158.51      112.16     32.46 o
   2   2   4      397.50      310.99     44.05 o
   3   2   4      392.98      432.36     47.73 o
   4   2   4      639.02      723.58     60.14 o
   5   2   4     1888.79     1951.12     66.07 o
   6   2   4        3.41       51.82     54.00 o
   7   2   4      694.50      850.81    102.55 o
   8   2   4     1379.49     1430.32    132.82 o
   9   2   4      199.88      184.65    112.91 o
  10   2   4        1.57       37.43    124.78 o
  11   2   4       25.13       58.30    144.83 o
  12   2   4       17.57       66.34    176.74 o
  13   2   4      352.96      348.36    201.56 o
 -13   3   4       28.80      160.98    212.87 o
 -12   3   4     4537.95     5148.65    315.97 o
 -11   3   4     1023.75      905.09    187.44 o
 -10   3   4     1233.82     1061.71    158.12 o
  -9   3   4      108.81      135.62    113.05 o
  -8   3   4     1605.33     1741.58    129.14 o
  -7   3   4     8731.32     8544.13    200.26 o
  -6   3   4     1718.62     1689.76     95.39 o
  -5   3   4     9590.24     9500.43    152.67 o
  -4   3   4    25800.21    25577.24    270.42 o
  -3   3   4        9.36       14.66     36.34 o
  -2   3   4     2035.63     2084.89     81.75 o
  -1   3   4    12817.77    12773.11    162.89 o
   0   3   4     1499.58     1360.77     49.43 o
   1   3   4     4531.34     4490.67     85.91 o
   2   3   4       91.89       67.84     35.73 o
   3   3   4    15601.02    16065.83    197.74 o
   4   3   4    22243.43    22842.95    258.42 o
   5   3   4      527.98      491.75     55.84 o
   6   3   4     7928.13     8005.54    186.08 o
   7   3   4    18414.29    18173.91    324.63 o
   8   3   4     2706.96     2797.50    170.05 o
   9   3   4       36.71       77.66    110.87 o
  10   3   4     1021.85      733.47    150.96 o
  11   3   4     2937.26     2908.16    226.37 o
  12   3   4     2023.49     1736.54    223.92 o
  13   3   4       15.32       97.23    201.28 o
 -13   4   4     4736.01     5537.38    380.00 o
 -12   4   4     2512.43     2790.41    260.19 o
 -11   4   4      834.98      661.19    180.28 o
 -10   4   4    10901.49    10784.29    331.86 o
  -9   4   4     6748.35     6902.31    243.35 o
  -8   4   4     1388.23     1667.81    141.48 o
  -7   4   4     5952.88     5849.60    169.44 o
  -6   4   4     5119.22     4483.10    129.82 o
  -5   4   4     2653.57     2786.45    103.91 o
  -4   4   4       78.42       81.21     43.37 o
  -3   4   4     1066.25      975.93     53.46 o
  -2   4   4    35914.34    35593.70    372.22 o
  -1   4   4    14183.23    14304.21    196.24 o
   0   4   4     6674.60     6738.46     97.57 o
   1   4   4    32425.00    31772.20    308.61 o
   2   4   4    19924.95    20096.46    238.51 o
   3   4   4     1202.08     1225.83     66.21 o
   4   4   4     4106.86     4057.90    104.60 o
   5   4   4     2172.72     2299.41     98.87 o
   6   4   4     4812.32     4954.05    160.03 o
   7   4   4        7.15       69.14     89.80 o
   8   4   4     2816.59     2897.66    181.78 o
   9   4   4    16819.66    16688.57    370.72 o
  10   4   4     4845.64     5003.08    226.44 o
  11   4   4     1890.33     1857.97    208.44 o
  12   4   4     6272.97     6047.20    339.29 o
  13   4   4     3938.62     3693.86    298.86 o
 -13   5   4     2555.33     3021.96    289.65 o
 -12   5   4      324.56       56.87    189.55 o
 -11   5   4     1075.23     1281.74    205.37 o
 -10   5   4       93.99      138.69    147.21 o
  -9   5   4      221.35      149.94    129.01 o
  -8   5   4     2279.41     2313.59    152.33 o
  -7   5   4    11270.03    10473.29    230.26 o
  -6   5   4     3370.45     3614.42    141.69 o
  -5   5   4     8600.76     8310.12    158.05 o
  -4   5   4    12061.51    11350.16    180.21 o
  -3   5   4     5149.78     5048.08    103.57 o
  -2   5   4    24735.15    25391.92    276.22 o
  -1   5   4      370.61      273.35     42.55 o
   0   5   4      154.96      121.78     36.21 o
   1   5   4     3326.05     3399.44     64.71 o
   2   5   4     2427.02     2523.32     70.71 o
   3   5   4     5345.10     5091.86    103.23 o
   4   5   4    20416.39    20593.12    259.38 o
   5   5   4      294.67      157.71     73.16 o
   6   5   4    14820.33    15279.86    289.17 o
   7   5   4     1633.03     2057.96    159.21 o
   8   5   4      153.70      134.60    112.85 o
   9   5   4     1633.47     1929.09    178.10 o
  10   5   4      232.72      232.58    137.73 o
  11   5   4     1784.24     1786.72    204.76 o
  12   5   4     1025.87      854.02    203.53 o
 -12   6   4      749.52     1006.07    217.37 o
 -11   6   4       17.80       80.12    171.08 o
 -10   6   4       21.22      187.99    159.21 o
  -9   6   4      350.98      242.19    136.17 o
  -8   6   4      430.50      175.30    126.76 o
  -7   6   4      259.10      144.96     86.46 o
  -6   6   4     3906.87     4214.04    153.08 o
  -5   6   4     1800.10     1926.77    105.76 o
  -4   6   4     1117.59     1072.14     80.19 o
  -3   6   4       12.85       44.59     49.64 o
  -2   6   4      770.33      652.46     55.23 o
  -1   6   4      474.44      530.00     54.68 o
   0   6   4        7.79       45.41     39.55 o
   1   6   4       15.89       31.91     37.16 o
   2   6   4      198.48      130.10     45.27 o
   3   6   4      387.44      254.67     42.48 o
   4   6   4        0.27       67.23     64.23 o
   5   6   4     1455.10     1585.64    124.23 o
   6   6   4     1873.74     2141.76    142.64 o
   7   6   4      405.14      287.40    109.91 o
   8   6   4      196.15      253.17    124.57 o
   9   6   4       16.75      114.55    133.44 o
  10   6   4      588.91      492.36    158.39 o
  11   6   4       65.96       95.39    158.12 o
  12   6   4      214.40      258.97    189.96 o
 -12   7   4     1600.09     1983.64    273.63 o
 -11   7   4     2295.38     2359.20    255.76 o
 -10   7   4     1070.43     1090.55    205.31 o
  -9   7   4      481.38      381.63    154.64 o
  -8   7   4     1305.00     1110.94    176.53 o
  -7   7   4     1413.58     1507.16    129.42 o
  -6   7   4      709.19      608.28    102.00 o
  -5   7   4     3567.89     3473.82    142.78 o
  -4   7   4    11052.22    10535.34    201.42 o
  -3   7   4     3560.58     3627.04    133.51 o
  -2   7   4      566.95      443.27     64.43 o
  -1   7   4     8112.14     7940.15    160.98 o
   0   7   4     5521.18     5531.04    122.39 o
   1   7   4     3493.09     3325.39    110.19 o
   2   7   4     1215.46     1087.01     61.98 o
   3   7   4     7422.72     7413.76    150.69 o
   4   7   4     5379.51     5331.66    118.37 o
   5   7   4      114.27      139.44     87.75 o
   6   7   4     4513.80     5368.96    210.08 o
   7   7   4     5335.20     5048.56    216.21 o
   8   7   4     1867.15     1798.93    184.65 o
   9   7   4        4.90       10.84    144.08 o
  10   7   4     3973.83     4644.36    304.51 o
  11   7   4     2586.29     2852.80    269.40 o
  12   7   4     1088.02      725.49    216.21 o
 -12   8   4     1295.49     1178.72    269.74 o
 -11   8   4        3.38       87.41    199.99 o
 -10   8   4    10504.06     9754.83    363.09 o
  -9   8   4     6240.71     6126.43    299.88 o
  -8   8   4        0.06       21.82    134.94 o
  -7   8   4     6034.12     6090.49    241.10 o
  -6   8   4    11380.00    10792.33    252.35 o
  -5   8   4       18.38       31.98     78.00 o
  -4   8   4      182.35      110.80     76.03 o
  -3   8   4     3400.94     3390.84    151.71 o
  -2   8   4    24491.70    24435.69    374.13 o
  -1   8   4     6535.50     6442.19    151.58 o
   0   8   4     2792.86     2784.61    113.05 o
   1   8   4    43102.01    42667.49    463.59 o
   2   8   4     8035.02     8059.82    148.78 o
   3   8   4     2007.46     2083.67     92.25 o
   4   8   4     2224.62     2553.74    121.23 o
   5   8   4    11172.88    10980.93    218.33 o
   6   8   4     7741.39     7818.17    224.94 o
   7   8   4     1844.67     2038.87    184.17 o
   8   8   4     4860.62     4725.57    247.10 o
   9   8   4    16192.04    16031.06    418.32 o
  10   8   4     2158.78     2022.91    234.76 o
  11   8   4      910.04      937.89    219.42 o
  12   8   4     5480.68     5789.39    353.06 o
 -12   9   4     1590.74     1552.23    285.70 o
 -11   9   4       17.56      228.83    215.94 o
 -10   9   4        1.29       94.98    184.03 o
  -9   9   4       71.71      262.44    175.44 o
  -8   9   4     3287.81     3168.42    250.58 o
  -7   9   4     5611.97     6128.34    264.08 o
  -6   9   4     7282.00     6342.37    229.10 o
  -5   9   4     4761.40     4680.29    194.74 o
  -4   9   4     4707.90     4750.73    174.83 o
  -3   9   4      255.26      201.56     82.91 o
  -2   9   4       75.34       82.98     72.55 o
  -1   9   4       54.21       83.05     70.16 o
   0   9   4      396.69      292.72     71.32 o
   1   9   4     1658.32     1586.33     93.96 o
   2   9   4     1728.23     1691.06    104.05 o
   3   9   4     6119.03     6110.00    142.37 o
   4   9   4     3922.82     4235.79    125.94 o
   5   9   4     2023.70     2162.49    129.96 o
   6   9   4     1415.86     1532.32    120.14 o
   7   9   4     2286.90     2641.28    211.17 o
   8   9   4       75.58       48.07    138.55 o
   9   9   4      247.73      386.47    168.01 o
  10   9   4       14.45        0.00    178.17 o
  11   9   4       26.40       94.91    205.65 o
 -11  10   4      410.56      279.97    224.19 o
 -10  10   4       34.01       61.03    189.69 o
  -9  10   4      265.43      182.67    185.74 o
  -8  10   4      922.23      673.40    210.69 o
  -7  10   4       68.97      228.15    142.37 o
  -6  10   4      751.04      724.88    137.46 o
  -5  10   4     2495.18     2479.48    195.62 o
  -4  10   4      266.09      174.08     98.80 o
  -3  10   4     2130.75     2118.99    143.73 o
  -2  10   4      706.44      548.89    101.80 o
  -1  10   4      674.39      568.87     95.25 o
   0  10   4      158.00      174.76     70.37 o
   1  10   4       32.46       12.34     65.12 o
   2  10   4      248.30      173.39     72.75 o
   3  10   4     3136.73     3460.12    140.26 o
   4  10   4     1063.84      860.43     89.19 o
   5  10   4     1640.57     1599.28     99.14 o
   6  10   4      484.67      461.34    106.44 o
   7  10   4      163.60      172.03    101.66 o
   8  10   4      273.80      258.01    153.62 o
   9  10   4      348.42      239.33    182.53 o
  10  10   4       90.28       80.39    195.42 o
  11  10   4      315.78      246.90    226.78 o
 -11  11   4     3677.49     3511.26    339.29 o
 -10  11   4      461.54      563.14    215.60 o
  -9  11   4     1227.51     1234.76    251.74 o
  -8  11   4     4312.13     4712.82    351.97 o
  -7  11   4     3923.87     4520.74    336.36 o
  -6  11   4        3.53       73.64    127.51 o
  -5  11   4     5564.64     5351.71    264.76 o
  -4  11   4     8766.99     8492.25    263.33 o
  -3  11   4     5244.28     5393.10    193.51 o
  -2  11   4      238.92      214.31     94.03 o
  -1  11   4     6178.83     5976.90    163.85 o
   0  11   4     8851.72     8908.99    209.33 o
   1  11   4      838.58      580.46     94.03 o
   2  11   4     1995.33     2034.71    120.96 o
   3  11   4     6575.12     6694.41    172.58 o
   4  11   4     7117.32     7053.88    175.44 o
   5  11   4      109.56      117.69     81.07 o
   6  11   4     2978.34     3261.70    185.87 o
   7  11   4     6217.09     6658.34    222.62 o
   8  11   4     2235.74     2163.24    210.56 o
   9  11   4      160.44      174.14    183.49 o
  10  11   4     1941.36     1939.25    259.58 o
 -10  12   4     4527.89     4009.35    388.65 o
  -9  12   4     5142.81     6015.35    444.98 o
  -8  12   4        0.35        0.00    204.69 o
  -7  12   4     2198.61     1848.02    322.17 o
  -6  12   4     1815.71     1575.55    227.74 o
  -5  12   4     3646.35     3873.46    261.01 o
  -4  12   4      720.08      846.59    153.14 o
  -3  12   4     4616.47     4976.96    218.53 o
  -2  12   4     7470.45     7553.61    194.80 o
  -1  12   4     4885.27     5033.49    186.15 o
   0  12   4     1258.34     1210.97    120.96 o
   1  12   4     6605.23     7037.11    195.28 o
   2  12   4     6196.78     6141.84    174.76 o
   3  12   4      294.37      185.94     90.48 o
   4  12   4     5071.29     5296.00    182.46 o
   5  12   4     6672.97     6472.60    183.01 o
   6  12   4     4235.24     4065.06    166.37 o
   7  12   4     2354.97     2021.01    173.26 o
   8  12   4      862.06      945.45    149.46 o
   9  12   4     5212.90     5776.09    336.29 o
  10  12   4     3343.49     3143.26    274.99 o
 -10  13   4       87.82      248.26    268.38 o
  -9  13   4      279.74      147.14    247.10 o
  -8  13   4      318.19      213.42    226.44 o
  -7  13   4     2796.28     2443.07    371.34 o
  -6  13   4       90.45      185.60    199.10 o
  -5  13   4     1623.31     1387.23    197.60 o
  -4  13   4     9488.26     9089.96    321.77 o
  -3  13   4        5.84        0.00    126.89 o
  -2  13   4     1499.82     1293.13    138.69 o
  -1  13   4      543.60      433.86    112.64 o
   0  13   4      118.84      104.53     95.87 o
   1  13   4      567.79      427.11    107.66 o
   2  13   4      526.42      415.32    106.44 o
   3  13   4     1489.44     1426.64    134.26 o
   4  13   4     7491.52     7639.11    213.96 o
   5  13   4       45.30       41.59    100.64 o
   6  13   4     2106.85     2144.90    149.53 o
   7  13   4     2026.34     1935.23    186.15 o
   8  13   4      628.01      565.19    161.94 o
   9  13   4      385.60      262.58    200.05 o
  -9  14   4      241.59        0.00    258.42 o
  -8  14   4      438.39      144.42    317.47 o
  -7  14   4        5.55      136.23    291.29 o
  -6  14   4     1863.55     1675.72    252.22 o
  -5  14   4      808.74      610.19    225.22 o
  -4  14   4      204.90      336.02    160.37 o
  -3  14   4     2109.55     2047.60    212.46 o
  -2  14   4      216.81       72.34    125.60 o
  -1  14   4      628.36      597.03    122.53 o
   0  14   4      121.28      156.28    112.23 o
   1  14   4       60.01       54.00    109.23 o
   2  14   4     1838.37     1725.35    156.14 o
   3  14   4     1254.84     1020.53    138.89 o
   4  14   4      495.56      346.93    118.78 o
   5  14   4     5375.17     5782.98    230.12 o
   6  14   4      980.10      700.26    130.64 o
   7  14   4      241.62      325.86    165.21 o
   8  14   4      377.20      300.22    172.30 o
   9  14   4      162.21      350.95    174.35 o
  -8  15   4     4818.38     4467.76    521.62 o
  -7  15   4     2306.06     1079.98    354.43 o
  -6  15   4       62.95      121.10    294.70 o
  -5  15   4     1746.25     1058.98    245.60 o
  -4  15   4     3316.33     3332.75    265.38 o
  -3  15   4     3279.44     3422.41    288.90 o
  -2  15   4       11.29      129.89    159.28 o
  -1  15   4     3591.70     3968.85    278.06 o
   0  15   4    10185.30     9523.00    287.88 o
   1  15   4      672.24      159.01    126.42 o
   2  15   4     1745.22     1378.36    157.37 o
   3  15   4     2726.46     2625.81    193.03 o
   4  15   4     1952.75     1520.66    177.28 o
   5  15   4      253.57      252.97    136.78 o
   6  15   4      328.67      215.74    138.21 o
   7  15   4     3631.19     3379.93    189.21 o
   8  15   4     2185.65     2204.22    222.76 o
  -7  16   4     1840.29     1723.85    417.84 o
  -6  16   4     2094.97     2193.38    417.97 o
  -5  16   4     2150.85     2265.99    314.61 o
  -4  16   4       84.40      130.78    191.60 o
  -3  16   4     1511.52     1176.19    228.15 o
  -2  16   4     4383.36     4891.26    326.47 o
  -1  16   4     5650.40     5934.49    330.29 o
   0  16   4      736.12      449.95    155.19 o
   1  16   4     3482.40     3528.71    228.28 o
   2  16   4     3434.20     3609.10    241.24 o
   3  16   4       32.67       83.46    144.96 o
   4  16   4     2278.54     2251.13    203.46 o
   5  16   4     1275.16     1204.83    181.85 o
   6  16   4     2661.93     2465.37    217.71 o
   7  16   4      211.77      308.20    155.26 o
  -6  17   4       62.94        0.00    357.43 o
  -5  17   4     1372.11     1128.87    305.81 o
  -4  17   4     1919.02     1774.24    295.45 o
  -3  17   4        2.52       18.21    204.28 o
  -2  17   4      595.73      463.52    208.10 o
  -1  17   4      959.83      625.73    201.76 o
   0  17   4      343.25      241.44    189.83 o
   1  17   4      700.70      736.94    182.74 o
   2  17   4       19.84       35.18    165.49 o
   3  17   4      147.19      224.81    180.21 o
   4  17   4     2704.82     2762.25    241.38 o
   5  17   4       26.37      131.12    183.21 o
   6  17   4     2040.96     1764.02    217.03 o
  -4  18   4     1251.87     1340.11    361.45 o
  -3  18   4     3501.15     3175.24    364.79 o
  -2  18   4      316.61      289.24    249.08 o
  -1  18   4       82.72       31.23    220.78 o
   0  18   4      155.77      144.01    230.74 o
   1  18   4       46.80      111.89    223.85 o
   2  18   4     1083.15      932.57    235.58 o
   3  18   4     1051.96      981.25    227.19 o
   4  18   4       53.80       47.32    205.24 o
  -2  19   4       15.88      152.26    260.19 o
  -1  19   4     4201.94     4648.86    431.20 o
   0  19   4     2632.17     3321.09    362.81 o
   1  19   4      761.87      346.45    263.19 o
 -13   1   5     1176.53     1446.61    278.26 o
 -12   1   5     3324.94     3584.08    306.08 o
 -11   1   5        4.22       37.64    168.08 o
 -10   1   5     5786.78     6556.20    315.90 o
  -9   1   5     7645.35     7438.79    268.58 o
  -8   1   5      896.52      994.68    118.10 o
  -7   1   5     3707.30     4367.94    191.60 o
  -6   1   5     2451.44     2256.99    114.69 o
  -5   1   5     6849.38     6721.00    155.26 o
  -4   1   5     3658.26     3631.60    100.98 o
  -3   1   5      262.64      206.87     43.64 o
  -2   1   5    11820.74    11452.84    171.49 o
  -1   1   5    14567.96    14242.77    168.76 o
   0   1   5     1027.08     1228.42     73.71 o
   1   1   5     7808.93     7792.60    126.89 o
   2   1   5     3074.11     2675.58     78.96 o
   3   1   5     1208.02     1206.40     89.73 o
   4   1   5     4048.27     4187.65    152.87 o
   5   1   5      681.06      493.32     79.91 o
   6   1   5     1890.46     1776.15     68.73 o
   7   1   5     1689.77     1977.09    114.41 o
   8   1   5      369.73      409.66    101.66 o
   9   1   5     8652.76     8402.65    236.81 o
  10   1   5     3867.04     3746.02    223.78 o
  11   1   5       43.06      220.10    155.73 o
  12   1   5     3991.89     4384.03    282.42 o
 -13   2   5      644.22      417.50    246.08 o
 -12   2   5     3479.07     3760.41    320.27 o
 -11   2   5     3217.49     3181.17    253.44 o
 -10   2   5      680.42      921.32    171.21 o
  -9   2   5      121.03       81.41    133.23 o
  -8   2   5     2335.80     2452.21    155.46 o
  -7   2   5    12338.19    12125.97    257.40 o
  -6   2   5     3377.43     3550.12    151.10 o
  -5   2   5     9361.61     9434.02    186.90 o
  -4   2   5    32357.79    31714.44    408.91 o
  -3   2   5     9420.18     9609.32    180.62 o
  -2   2   5     2027.45     1863.36     82.84 o
  -1   2   5     6219.72     6442.13    106.64 o
   0   2   5     7618.02     7347.90    127.03 o
   1   2   5     4553.07     4376.39     89.87 o
   2   2   5     1094.80     1041.19     52.03 o
   3   2   5    12360.17    12402.11    185.26 o
   4   2   5    34204.82    32216.76    366.29 o
   5   2   5     5668.88     5668.63    114.96 o
   6   2   5     6298.47     6235.80    131.39 o
   7   2   5    14383.60    13919.71    255.97 o
   8   2   5     1840.33     2177.83    151.37 o
   9   2   5       99.00      135.82    121.64 o
  10   2   5      298.54      220.10    142.71 o
  11   2   5     2262.63     2362.61    216.56 o
  12   2   5     3017.02     2519.85    243.97 o
 -13   3   5     1576.34     1738.58    296.88 o
 -12   3   5     4286.36     4808.82    345.49 o
 -11   3   5       67.88      129.96    185.53 o
 -10   3   5     2501.80     2891.05    232.24 o
  -9   3   5     6500.79     6781.62    286.31 o
  -8   3   5     1437.38     1370.66    137.67 o
  -7   3   5     2957.43     3216.56    165.21 o
  -6   3   5     2006.51     1907.34    130.71 o
  -5   3   5     3321.20     3390.84    139.57 o
  -4   3   5     2332.82     2704.02    123.62 o
  -3   3   5      204.27      179.33     57.28 o
  -2   3   5     6614.26     6122.13    117.35 o
  -1   3   5    33576.16    33313.52    363.29 o
   0   3   5        2.80       17.25     32.25 o
   1   3   5    13155.12    12413.84    179.46 o
   2   3   5     5796.10     5594.99    101.87 o
   3   3   5      175.54      136.92     43.37 o
   4   3   5      489.31      588.51     53.05 o
   5   3   5      112.76      109.51     63.89 o
   6   3   5     7343.69     7228.71    171.14 o
   7   3   5     7515.77     7158.48    191.67 o
   8   3   5       62.39       88.64    108.07 o
   9   3   5     2746.54     3307.39    191.12 o
  10   3   5     4603.11     4598.20    229.44 o
  11   3   5       32.37       94.44    156.83 o
  12   3   5     2001.23     1984.80    235.85 o
 -12   4   5       11.42       76.50    226.31 o
 -11   4   5      341.63      353.74    191.67 o
 -10   4   5       27.85       77.25    161.87 o
  -9   4   5       61.58      129.14    128.39 o
  -8   4   5      381.03      426.16    111.21 o
  -7   4   5      184.55      149.73     93.00 o
  -6   4   5        2.13       60.28     80.46 o
  -5   4   5       97.67      166.92     86.87 o
  -4   4   5      429.64      401.00     72.34 o
  -3   4   5      183.09      140.32     61.57 o
  -2   4   5     8577.67     9125.75    169.10 o
  -1   4   5     1965.37     1782.02     73.30 o
   0   4   5      811.11      701.28     41.52 o
   1   4   5       29.30       36.14     47.73 o
   2   4   5      358.67      267.63     51.07 o
   3   4   5      385.97      313.24     53.93 o
   4   4   5      265.41      199.92     54.89 o
   5   4   5      408.09      380.95     77.12 o
   6   4   5     1515.28     1638.28    124.64 o
   7   4   5     3104.09     2893.71    149.39 o
   8   4   5        3.13       51.62    110.73 o
   9   4   5     1943.26     1830.56    163.24 o
  10   4   5       13.60      104.12    133.17 o
  11   4   5       42.99       21.14    156.21 o
  12   4   5        1.71      234.62    190.99 o
 -12   5   5     1321.64     1225.15    279.63 o
 -11   5   5       13.14       46.64    186.08 o
 -10   5   5     6850.89     7073.52    330.70 o
  -9   5   5     9274.95     9386.83    333.15 o
  -8   5   5      597.35      629.35    120.41 o
  -7   5   5      440.98      374.61    110.80 o
  -6   5   5     5059.60     5034.72    174.83 o
  -5   5   5     2397.83     2428.34    133.92 o
  -4   5   5      336.74      277.51     72.41 o
  -3   5   5      123.30      166.78     63.82 o
  -2   5   5    14012.29    14318.93    247.58 o
  -1   5   5     5790.24     5407.21    124.51 o
   0   5   5      153.83       75.96     39.96 o
   1   5   5     8502.30     8253.60    141.76 o
   2   5   5    14164.56    13975.14    221.74 o
   3   5   5     1150.99     1120.01     88.85 o
   4   5   5      563.41      580.60     76.50 o
   5   5   5     1252.85     1371.54    103.03 o
   6   5   5     2717.27     2829.61    142.64 o
   7   5   5       20.31       83.94     94.85 o
   8   5   5      264.62      192.90    122.19 o
   9   5   5     6393.48     6441.44    250.99 o
  10   5   5     2355.69     2464.34    201.35 o
  11   5   5      253.01      123.41    169.03 o
  12   5   5     1917.61     2235.04    251.13 o
 -12   6   5     4208.15     5245.41    416.34 o
 -11   6   5     3575.03     3480.03    337.72 o
 -10   6   5     2146.89     1892.48    269.13 o
  -9   6   5      715.91      570.16    205.71 o
  -8   6   5     2458.07     2410.27    197.67 o
  -7   6   5    15936.55    14600.33    357.90 o
  -6   6   5    11857.21    11667.83    287.40 o
  -5   6   5     2081.19     1797.22    134.12 o
  -4   6   5    25226.97    24835.66    389.40 o
  -3   6   5    11631.57    11506.03    231.08 o
  -2   6   5      182.37      113.12     62.59 o
  -1   6   5     4126.32     3900.32    128.26 o
   0   6   5     4675.98     4694.95    113.46 o
   1   6   5    10784.97    10238.06    173.39 o
   2   6   5     3720.88     3591.99    136.78 o
   3   6   5     5224.00     4921.80    143.12 o
   4   6   5    25133.94    25466.71    376.79 o
   5   6   5     9001.11     8976.91    205.78 o
   6   6   5     2387.04     2694.67    169.71 o
   7   6   5     6541.17     6653.09    220.17 o
   8   6   5     3739.51     4007.17    211.65 o
   9   6   5      106.85       33.48    145.71 o
  10   6   5      448.65      193.92    169.58 o
  11   6   5     1705.41     1389.20    217.10 o
  12   6   5     4093.74     4023.74    315.36 o
 -12   7   5     1221.84     1075.48    298.65 o
 -11   7   5      656.44      586.53    270.76 o
 -10   7   5     3611.98     3407.21    327.02 o
  -9   7   5     3229.33     3082.92    295.24 o
  -8   7   5     1493.65     1320.20    210.21 o
  -7   7   5     3032.93     3021.49    204.01 o
  -6   7   5     3821.22     3962.10    210.35 o
  -5   7   5      173.07      123.76     88.03 o
  -4   7   5      755.15      499.46     92.94 o
  -3   7   5       23.75       56.12     71.46 o
  -2   7   5     8586.74     8475.13    195.90 o
  -1   7   5     4740.48     4733.20    143.12 o
   0   7   5       31.91       30.82     57.62 o
   1   7   5    12089.31    12099.37    192.15 o
   2   7   5     9481.38     9556.48    174.62 o
   3   7   5     3136.75     3353.68    140.32 o
   4   7   5      964.37      846.59    101.39 o
   5   7   5     5333.42     5287.62    170.94 o
   6   7   5      682.11      464.41    112.91 o
   7   7   5     3573.65     3887.09    196.92 o
   8   7   5       87.88        3.75    132.35 o
   9   7   5     6214.49     6726.39    289.99 o
  10   7   5     2156.39     2593.56    248.88 o
  11   7   5      146.59      221.81    185.87 o
 -11   8   5      893.94      917.91    276.15 o
 -10   8   5      298.44      254.26    216.69 o
  -9   8   5     1956.04     1866.43    329.54 o
  -8   8   5      903.41      856.75    203.87 o
  -7   8   5      221.98      236.12    143.05 o
  -6   8   5     1458.94     1237.76    146.53 o
  -5   8   5     1142.28      985.48    121.71 o
  -4   8   5       43.66       97.50     89.05 o
  -3   8   5      717.24      583.32     96.07 o
  -2   8   5      133.53       67.57     75.34 o
  -1   8   5      177.47      151.98     73.30 o
   0   8   5     1588.53     1508.39    106.78 o
   1   8   5     1157.03     1167.19     91.30 o
   2   8   5     2892.51     3000.96     91.30 o
   3   8   5      166.04       73.98     65.05 o
   4   8   5     2018.33     2226.11    140.12 o
   5   8   5      866.81      799.67    111.28 o
   6   8   5      383.17      279.42    113.94 o
   7   8   5      117.53       87.07    116.26 o
   8   8   5     1702.41     1758.02    202.99 o
   9   8   5      492.61      414.22    176.80 o
  10   8   5      140.50      219.69    188.12 o
  11   8   5       18.62       76.57    203.33 o
 -11   9   5       13.65      216.28    263.06 o
 -10   9   5     1724.75     1186.08    284.81 o
  -9   9   5     5322.29     5569.15    536.21 o
  -8   9   5     3306.85     3196.99    299.40 o
  -7   9   5       19.66       33.07    133.23 o
  -6   9   5     5313.79     5737.84    246.08 o
  -5   9   5     4187.91     4541.81    211.58 o
  -4   9   5     1524.33     1304.93    127.44 o
  -3   9   5     2565.71     2530.89    151.71 o
  -2   9   5     8372.96     8477.04    213.90 o
  -1   9   5     7941.55     8075.29    200.74 o
   0   9   5        5.99       59.93     72.21 o
   1   9   5     6720.48     6990.13    170.94 o
   2   9   5     8510.21     8407.83    183.83 o
   3   9   5     3348.50     3868.75    164.74 o
   4   9   5     1031.33      824.43     89.94 o
   5   9   5     3255.23     3745.34    195.76 o
   6   9   5     3850.38     4685.75    224.06 o
   7   9   5     1770.42     1805.75    169.78 o
   8   9   5      883.15      637.80    166.10 o
   9   9   5     4865.13     5268.80    313.24 o
  10   9   5     2255.87     2658.33    259.17 o
  11   9   5      326.28      124.71    219.62 o
 -11  10   5     1605.02     2205.86    339.36 o
 -10  10   5      644.78      415.25    326.27 o
  -9  10   5      515.82      358.65    272.60 o
  -8  10   5     4213.85     3410.69    414.36 o
  -7  10   5     9971.16     9808.35    347.81 o
  -6  10   5     3714.88     3605.29    250.03 o
  -5  10   5     3750.53     3838.96    218.87 o
  -4  10   5    10944.65    10964.16    282.70 o
  -3  10   5     5000.91     4985.01    186.28 o
  -2  10   5        0.73       24.34     86.94 o
  -1  10   5     3526.57     3535.67    163.24 o
   0  10   5     4896.99     5042.42    179.12 o
   1  10   5     4834.08     4631.33    154.17 o
   2  10   5      374.73      237.62     79.44 o
   3  10   5     4153.32     4297.43    148.03 o
   4  10   5     8988.82     9075.16    206.06 o
   5  10   5     1317.37     1205.58    107.39 o
   6  10   5     6041.65     6251.07    262.04 o
   7  10   5    10730.78    10576.32    306.08 o
   8  10   5     1197.77     1360.63    186.76 o
   9  10   5      246.07      205.10    175.71 o
  10  10   5      558.42      215.67    182.05 o
 -10  11   5     1291.09      682.33    371.74 o
  -9  11   5     1587.16     1506.41    354.56 o
  -8  11   5      247.42      198.76    280.92 o
  -7  11   5     1897.79     2175.38    270.29 o
  -6  11   5       57.05       78.89    138.28 o
  -5  11   5      304.85      283.85    142.78 o
  -4  11   5      896.36      740.15    135.96 o
  -3  11   5        6.67       67.23     97.44 o
  -2  11   5     3360.31     3868.96    193.65 o
  -1  11   5     4497.09     4609.58    194.53 o
   0  11   5      599.06      404.27     94.44 o
   1  11   5     3669.18     3784.34    159.28 o
   2  11   5     2916.81     3084.97    148.23 o
   3  11   5      251.80      144.48     84.41 o
   4  11   5     1409.74     1395.54    138.21 o
   5  11   5       14.81       47.66    100.57 o
   6  11   5      872.67      792.99    146.94 o
   7  11   5     2438.96     2787.81    222.49 o
   8  11   5       41.06      186.21    166.10 o
   9  11   5     3329.08     3372.16    274.44 o
  10  11   5     4137.75     4400.80    316.58 o
 -10  12   5      489.93      605.82    389.75 o
  -9  12   5      622.46      563.75    345.15 o
  -8  12   5      915.89      666.71    331.79 o
  -7  12   5      232.18       23.11    201.76 o
  -6  12   5        8.35       79.98    159.69 o
  -5  12   5       33.70      240.97    147.62 o
  -4  12   5       53.36      134.73    127.78 o
  -3  12   5     1933.80     1593.35    152.46 o
  -2  12   5     2088.42     1778.33    151.51 o
  -1  12   5      181.99      187.10     99.55 o
   0  12   5     1173.85     1411.43    129.14 o
   1  12   5      262.06      192.21    101.53 o
   2  12   5      931.89      802.61    110.39 o
   3  12   5      275.85      151.23     94.23 o
   4  12   5      466.32      517.66     99.41 o
   5  12   5        2.68      106.30    121.10 o
   6  12   5      259.27      216.21    116.46 o
   7  12   5        0.54       69.34    158.53 o
   8  12   5     1466.15     1383.07    213.56 o
   9  12   5      949.39     1223.85    225.08 o
  -9  13   5     3044.76     2383.00    453.16 o
  -8  13   5      597.93      304.04    320.40 o
  -7  13   5      694.89      749.69    246.42 o
  -6  13   5     4587.00     4797.16    313.38 o
  -5  13   5     4111.04     4257.82    286.99 o
  -4  13   5       74.53      203.33    151.71 o
  -3  13   5     4015.21     4000.21    240.42 o
  -2  13   5     4010.53     4460.39    219.97 o
  -1  13   5     4190.12     4118.86    204.15 o
   0  13   5       14.05       99.89    102.62 o
   1  13   5     2815.30     2592.46    165.01 o
   2  13   5     8865.21     8994.29    231.15 o
   3  13   5     3716.03     3916.62    188.46 o
   4  13   5      497.61      390.36    112.71 o
   5  13   5     6404.07     6325.80    248.67 o
   6  13   5     2617.12     2481.94    199.37 o
   7  13   5      559.01      234.97    191.40 o
   8  13   5     2295.15     2271.45    250.92 o
   9  13   5     1489.41     1233.67    241.92 o
  -8  14   5     1900.16      739.26    380.75 o
  -7  14   5     5579.04     5629.29    408.22 o
  -6  14   5     2024.05     1926.91    280.45 o
  -5  14   5      261.11      119.46    171.28 o
  -4  14   5     7056.45     6948.81    324.29 o
  -3  14   5     2499.42     2558.64    244.44 o
  -2  14   5      478.00      344.61    128.19 o
  -1  14   5     2505.39     2194.20    177.89 o
   0  14   5     3975.35     4019.03    215.87 o
   1  14   5     1878.06     1732.99    153.14 o
   2  14   5      237.22      103.16    116.73 o
   3  14   5     2207.35     2366.02    170.80 o
   4  14   5     5979.47     6310.46    227.19 o
   5  14   5      648.89      585.57    166.64 o
   6  14   5     1040.54     1019.57    190.85 o
   7  14   5     4041.93     4319.46    239.53 o
   8  14   5     2139.15     1920.50    271.17 o
  -7  15   5      856.78      520.18    364.38 o
  -6  15   5      197.47      178.37    242.33 o
  -5  15   5       10.61      103.23    181.03 o
  -4  15   5       84.48       26.80    183.15 o
  -3  15   5      551.80      401.27    187.30 o
  -2  15   5      636.81      699.58    180.01 o
  -1  15   5     4287.56     4482.08    232.44 o
   0  15   5       24.30       46.43    125.19 o
   1  15   5     5940.56     5854.10    238.78 o
   2  15   5     1478.60     1267.02    160.51 o
   3  15   5       30.70       21.61    127.78 o
   4  15   5      160.47      125.32    134.39 o
   5  15   5      115.71      129.35    136.78 o
   6  15   5      335.12      433.86    191.94 o
   7  15   5      786.93      712.26    202.44 o
  -6  16   5        1.78      232.24    262.24 o
  -5  16   5      299.43      652.19    230.67 o
  -4  16   5      385.44      319.92    220.58 o
  -3  16   5     1623.56     1899.23    261.15 o
  -2  16   5     1901.94     1898.82    249.97 o
  -1  16   5      149.29      150.08    173.74 o
   0  16   5     4325.44     4847.89    263.19 o
   1  16   5      435.46      243.42    155.60 o
   2  16   5      833.40      605.96    158.26 o
   3  16   5      632.51      392.54    153.35 o
   4  16   5      215.76      232.44    157.98 o
   5  16   5      273.92      313.38    160.78 o
   6  16   5       40.44       38.66    201.49 o
  -5  17   5     4994.32     5324.71    486.64 o
  -4  17   5       35.33       16.36    222.90 o
  -3  17   5     1394.45      949.55    239.53 o
  -2  17   5     3747.01     4141.02    329.67 o
  -1  17   5      885.02     1045.14    220.10 o
   0  17   5      128.15       98.80    171.55 o
   1  17   5      486.34      364.93    172.10 o
   2  17   5     4076.98     3538.81    241.44 o
   3  17   5     2229.56     2108.83    216.96 o
   4  17   5       27.64       91.57    169.03 o
   5  17   5     2509.58     2357.64    219.90 o
  -3  18   5     2292.18     1995.71    289.92 o
  -2  18   5        8.49      134.87    232.44 o
  -1  18   5     1777.24     1327.63    257.94 o
   0  18   5     2863.19     2571.19    306.15 o
   1  18   5     2195.12     1495.50    239.53 o
   2  18   5        3.22       26.11    184.58 o
   3  18   5     2413.23     2782.63    265.10 o
 -12   0   6     8459.25     9964.97    742.60 o
 -11   0   6     1364.44     1758.42    447.98 o
 -10   0   6     3725.60     5161.54    547.53 o
  -9   0   6    15521.18    15071.42    551.62 o
  -8   0   6     2444.35     2508.05    273.22 o
  -7   0   6       74.04      123.21    135.82 o
  -6   0   6      657.54      518.41    140.26 o
  -5   0   6     3436.30     3336.16    213.21 o
  -4   0   6    10489.74    10147.92    305.13 o
  -3   0   6       35.56       12.34     81.48 o
  -2   0   6    10969.40    10879.41    357.36 o
  -1   0   6    27444.96    27391.79    385.86 o
   0   0   6     2251.67     2253.86    139.78 o
   1   0   6    10066.04    10325.27    240.28 o
   2   0   6    17984.86    17568.22    298.38 o
   3   0   6     4852.02     4301.52    197.80 o
   4   0   6      742.12      790.81    129.07 o
   5   0   6     1752.33     1821.29    159.55 o
   6   0   6     1226.53     1176.06    156.62 o
   7   0   6     7012.44     6641.50    242.47 o
   8   0   6      253.17      171.21    147.42 o
   9   0   6     9518.78     9080.00    346.18 o
  10   0   6    14182.29    14248.50    470.07 o
  11   0   6      957.12     1228.35    298.99 o
  12   0   6     5655.73     5333.44    411.70 o
 -12   1   6       73.71       16.98    297.97 o
 -11   1   6     1975.68     1769.33    301.04 o
 -10   1   6       21.86        0.00    210.62 o
  -9   1   6      310.26      281.67    146.12 o
  -8   1   6       48.47        7.36    118.03 o
  -7   1   6     7638.21     7301.73    249.22 o
  -6   1   6     4862.51     5029.26    175.03 o
  -5   1   6      224.39      288.42     84.34 o
  -4   1   6    10512.55    10026.21    215.67 o
  -3   1   6     6155.56     6054.83    153.89 o
  -2   1   6     1938.51     2034.85     92.05 o
  -1   1   6      293.23      212.74     37.91 o
   0   1   6     2417.00     2396.57    104.94 o
   1   1   6     3604.33     3785.23     91.91 o
   2   1   6     4802.43     4860.64     92.46 o
   3   1   6      102.63      114.07     56.46 o
   4   1   6    15377.80    14808.64    260.88 o
   5   1   6     6862.92     6481.13    159.76 o
   6   1   6     1808.72     1712.47     96.41 o
   7   1   6     7178.71     6841.96    156.89 o
   8   1   6     2188.81     2191.33    153.89 o
   9   1   6      174.59      181.44    117.28 o
  10   1   6       23.67      125.94    141.62 o
  11   1   6      397.69      592.80    183.62 o
  12   1   6     2668.41     2513.37    254.88 o
 -12   2   6      267.52      315.36    358.52 o
 -11   2   6      255.61      152.73    270.49 o
 -10   2   6      235.07      435.98    241.03 o
  -9   2   6       53.31      146.80    138.01 o
  -8   2   6        4.30        2.59    125.53 o
  -7   2   6      495.60      434.61    114.14 o
  -6   2   6      200.62       91.50     92.73 o
  -5   2   6        1.64       18.41     69.82 o
  -4   2   6      156.38      138.14     73.91 o
  -3   2   6       67.92       41.93     58.16 o
  -2   2   6      273.85      152.46     55.03 o
  -1   2   6       13.42       21.14     36.55 o
   0   2   6      759.76      640.67     82.09 o
   1   2   6     2126.34     2148.92     91.03 o
   2   2   6      402.16      399.56     51.89 o
   3   2   6      157.23       87.96     55.03 o
   4   2   6        0.23      109.85     56.25 o
   5   2   6        8.92       34.50     59.93 o
   6   2   6       26.38       75.69     82.23 o
   7   2   6       29.65       73.23     78.14 o
   8   2   6      105.51      114.89     99.00 o
   9   2   6      214.53      135.42    128.46 o
  10   2   6        5.20      105.14    138.28 o
  11   2   6      314.29      259.65    172.10 o
  12   2   6      291.13      538.18    206.40 o
 -12   3   6      575.86      935.02    375.50 o
 -11   3   6      222.10      234.69    300.49 o
 -10   3   6      999.41     1101.39    275.06 o
  -9   3   6       46.35      171.01    145.85 o
  -8   3   6      430.25      161.80    128.46 o
  -7   3   6     5990.25     6394.12    233.60 o
  -6   3   6     4407.09     4598.88    187.37 o
  -5   3   6     1107.06     1005.18    114.28 o
  -4   3   6     4196.34     4266.20    151.51 o
  -3   3   6     9920.01     9542.30    191.05 o
  -2   3   6      238.25      189.62     57.55 o
  -1   3   6     4934.95     4878.23     97.30 o
   0   3   6     6593.36     6112.04    160.03 o
   1   3   6     8038.22     8419.22    187.85 o
   2   3   6      352.93      322.38     62.87 o
   3   3   6     1671.05     1757.67     84.69 o
   4   3   6     9744.78     9181.05    164.46 o
   5   3   6     9756.73     9147.50    201.56 o
   6   3   6       25.67       31.02     74.32 o
   7   3   6     3091.06     2985.35    141.89 o
   8   3   6     2962.34     3048.35    159.62 o
   9   3   6      661.24      597.71    143.05 o
  10   3   6       71.81      187.78    149.73 o
  11   3   6     1285.23     1098.53    197.46 o
  12   3   6     3100.97     2923.91    265.92 o
 -12   4   6     4865.19     4341.14    645.03 o
 -11   4   6     1901.67     2223.38    462.98 o
 -10   4   6     3586.23     3756.59    437.75 o
  -9   4   6    13980.15    13531.67    412.32 o
  -8   4   6     5601.68     6055.86    260.60 o
  -7   4   6     1417.55     1458.55    155.19 o
  -6   4   6     6446.87     6767.91    225.49 o
  -5   4   6     1618.03     1531.23    129.07 o
  -4   4   6     2724.88     2948.32    153.55 o
  -3   4   6      813.64      663.10     84.55 o
  -2   4   6     5815.21     5640.13    147.35 o
  -1   4   6    25740.89    25647.81    325.86 o
   0   4   6     2951.84     2878.98     92.73 o
   1   4   6    15306.07    15468.94    307.99 o
   2   4   6    19116.44    18780.49    346.72 o
   3   4   6     1356.44     1263.47     94.30 o
   4   4   6      722.93      702.03     81.14 o
   5   4   6     1876.07     2118.10    122.66 o
   6   4   6     7480.67     7363.44    184.92 o
   7   4   6     6973.86     6680.98    203.81 o
   8   4   6       27.76       93.62    112.23 o
   9   4   6     9245.24     9265.26    270.69 o
  10   4   6    10245.09     9052.25    310.31 o
  11   4   6      194.90      168.08    183.21 o
 -12   5   6     1620.08     1849.59    537.50 o
 -11   5   6      174.89       16.09    364.45 o
 -10   5   6       17.60       79.30    320.40 o
  -9   5   6      462.09      550.19    189.55 o
  -8   5   6      276.31      327.29    172.17 o
  -7   5   6     2514.67     2914.16    220.99 o
  -6   5   6     8042.04     7738.87    229.03 o
  -5   5   6       72.63      107.53     85.57 o
  -4   5   6     9296.74     9409.74    219.42 o
  -3   5   6     2979.08     3262.25    147.14 o
  -2   5   6      169.06       90.55     65.39 o
  -1   5   6      939.44      938.57     83.59 o
   0   5   6      239.26      150.96     56.87 o
   1   5   6     1063.83     1009.96    117.21 o
   2   5   6     2461.07     2319.45    142.92 o
   3   5   6      881.03      856.47    104.80 o
   4   5   6     4267.01     4560.69    152.12 o
   5   5   6     1274.60     1602.69    136.98 o
   6   5   6     2066.35     2343.11    145.85 o
   7   5   6     4678.47     4853.34    196.92 o
   8   5   6     2958.84     3314.61    199.85 o
   9   5   6        0.00       45.21    146.73 o
  10   5   6       94.61      215.81    159.55 o
  11   5   6      328.47      194.94    188.46 o
 -11   6   6       16.59      214.65    388.18 o
 -10   6   6       89.22      307.65    392.06 o
  -9   6   6      286.32      215.87    224.60 o
  -8   6   6      167.88      152.60    153.42 o
  -7   6   6     2139.81     2312.43    202.17 o
  -6   6   6      806.19      687.10    119.80 o
  -5   6   6       31.72       91.16     90.69 o
  -4   6   6      949.40      858.79    110.19 o
  -3   6   6     1491.25     1481.39    114.14 o
  -2   6   6      328.84      232.17     73.98 o
  -1   6   6      576.98      410.06     72.48 o
   0   6   6       18.67       40.91     46.71 o
   1   6   6     1384.80     1542.82     96.28 o
   2   6   6      465.83      511.66     99.35 o
   3   6   6      499.18      356.54    101.39 o
   4   6   6      111.33      132.01     83.73 o
   5   6   6     2974.72     3308.27    151.78 o
   6   6   6      147.85      128.73     98.80 o
   7   6   6       68.54       90.41    111.35 o
   8   6   6      500.74      396.77    137.94 o
   9   6   6       58.58        2.52    146.60 o
  10   6   6       12.19       74.66    166.99 o
  11   6   6      361.86      518.96    204.56 o
 -11   7   6     2688.72     2224.95    533.41 o
 -10   7   6     1955.34     1597.92    429.36 o
  -9   7   6       30.31      103.57    229.24 o
  -8   7   6     3469.54     3241.72    248.60 o
  -7   7   6     4144.11     4504.03    269.13 o
  -6   7   6     4220.43     4397.19    231.28 o
  -5   7   6      189.72      242.60     97.91 o
  -4   7   6    14464.58    14792.61    296.20 o
  -3   7   6     4027.20     4369.03    180.35 o
  -2   7   6      879.97      740.97     94.03 o
  -1   7   6     2839.65     3090.76    134.32 o
   0   7   6     3179.35     3167.33    123.35 o
   1   7   6     3224.10     3316.52    142.71 o
   2   7   6     1533.65     1708.04    160.03 o
   3   7   6     6760.37     6511.06    202.03 o
   4   7   6    19869.54    19438.74    355.99 o
   5   7   6     3268.24     3287.75    155.53 o
   6   7   6        0.63       38.52     95.12 o
   7   7   6     6911.01     6567.25    224.74 o
   8   7   6     2573.89     2806.77    205.03 o
   9   7   6     1466.05     1503.96    208.31 o
  10   7   6      480.89      265.17    192.83 o
  11   7   6     2775.75     3161.26    271.99 o
 -11   8   6      685.90      348.56    401.13 o
 -10   8   6     1576.36     1759.17    478.73 o
  -9   8   6     5670.62     6554.56    484.05 o
  -8   8   6      595.03      307.17    180.62 o
  -7   8   6      582.67      503.27    148.37 o
  -6   8   6     2234.02     2233.27    182.33 o
  -5   8   6     4166.38     4060.63    203.60 o
  -4   8   6      770.39      789.51    116.19 o
  -3   8   6      500.05      399.50     94.91 o
  -2   8   6     9482.39     9551.02    224.94 o
  -1   8   6    13512.13    13303.72    258.69 o
   0   8   6      905.37      815.56     88.78 o
   1   8   6     6411.44     6738.87    202.44 o
   2   8   6    13550.83    14086.97    290.26 o
   3   8   6      697.83      770.97    125.39 o
   4   8   6       30.83       81.89    113.12 o
   5   8   6      982.67     1019.43    135.55 o
   6   8   6     5231.62     5212.27    230.06 o
   7   8   6     2809.80     3103.10    195.28 o
   8   8   6      394.59      200.87    145.10 o
   9   8   6     4818.85     5213.50    282.90 o
  10   8   6     5308.72     5633.93    300.15 o
 -10   9   6     1040.71      313.45    420.29 o
  -9   9   6     1077.70      889.27    350.06 o
  -8   9   6        8.67        0.00    169.64 o
  -7   9   6     2890.76     2962.91    243.01 o
  -6   9   6     5696.36     5677.43    261.35 o
  -5   9   6      158.45      121.85    110.19 o
  -4   9   6     6675.91     6685.89    207.01 o
  -3   9   6     5150.74     5349.53    196.92 o
  -2   9   6        1.47       38.73     86.19 o
  -1   9   6     1561.50     1333.15    115.37 o
   0   9   6       24.42       44.39     79.78 o
   1   9   6     1346.69     1376.04    104.60 o
   2   9   6     7542.68     8048.29    204.90 o
   3   9   6        9.27       79.30    110.73 o
   4   9   6     5603.07     6406.19    223.37 o
   5   9   6     5052.04     5519.10    217.85 o
   6   9   6     2273.57     2473.75    196.71 o
   7   9   6     5462.50     5715.75    241.78 o
   8   9   6       48.58       39.89    150.28 o
   9   9   6        4.53       93.75    175.51 o
  10   9   6       27.24      174.62    197.40 o
 -10  10   6      628.99      272.74    455.07 o
  -9  10   6       87.09      180.76    322.04 o
  -8  10   6      856.39     1133.03    212.94 o
  -7  10   6       39.82       50.46    166.10 o
  -6  10   6      465.60      339.77    160.98 o
  -5  10   6     2322.57     2285.97    191.53 o
  -4  10   6       56.48        0.00    103.10 o
  -3  10   6     1933.64     1507.03    141.96 o
  -2  10   6      384.24      364.11    105.55 o
  -1  10   6     1192.08      870.18    113.66 o
   0  10   6       72.85       42.96     88.57 o
   1  10   6      321.14      158.87     83.46 o
   2  10   6        2.32       22.09     93.35 o
   3  10   6     2274.64     2228.36    150.83 o
   4  10   6       16.67      138.21    121.10 o
   5  10   6     2183.80     1995.16    178.10 o
   6  10   6     3039.58     3070.71    220.51 o
   7  10   6       29.06       35.12    150.21 o
   8  10   6     1411.99     1271.24    207.42 o
   9  10   6       35.62      232.65    186.49 o
  10  10   6      215.85       90.48    202.71 o
 -10  11   6     2527.68     1838.06    441.63 o
  -9  11   6      273.31      141.28    338.88 o
  -8  11   6      139.90      131.67    243.01 o
  -7  11   6     4616.98     4314.62    300.97 o
  -6  11   6      572.08      586.32    189.15 o
  -5  11   6        5.47      227.87    141.69 o
  -4  11   6     1657.69     1498.78    161.87 o
  -3  11   6     2586.20     2421.59    180.14 o
  -2  11   6     1742.31     1681.99    144.21 o
  -1  11   6      285.88      280.31    104.80 o
   0  11   6     4045.50     4519.17    190.10 o
   1  11   6     4851.90     5075.36    181.51 o
   2  11   6      483.36      494.82     90.21 o
   3  11   6      915.16      706.40    122.32 o
   4  11   6     3417.48     3252.22    221.06 o
   5  11   6     1583.88     1341.06    176.19 o
   6  11   6      114.08      149.05    150.35 o
   7  11   6     1674.40     1734.63    209.87 o
   8  11   6     2309.09     2252.90    248.74 o
   9  11   6      321.60      361.11    214.10 o
  -9  12   6     4130.15     3795.59    490.25 o
  -8  12   6     2206.30     1750.79    304.31 o
  -7  12   6     1004.74      650.14    211.78 o
  -6  12   6     2718.30     2848.64    252.69 o
  -5  12   6     4024.52     4088.92    285.76 o
  -4  12   6     3208.05     3292.45    230.12 o
  -3  12   6       74.01      137.32    118.57 o
  -2  12   6     5800.20     5782.98    235.65 o
  -1  12   6    11121.50    11319.54    288.22 o
   0  12   6     2698.80     3054.28    171.89 o
   1  12   6     4268.80     4680.50    185.05 o
   2  12   6     8711.54     8968.65    218.60 o
   3  12   6     4325.86     4543.51    213.42 o
   4  12   6       24.26       31.64    112.37 o
   5  12   6     1407.80     1257.74    206.46 o
   6  12   6     2385.80     2530.42    234.83 o
   7  12   6     6041.91     6124.31    312.22 o
   8  12   6      180.27      158.05    212.67 o
  -8  13   6       45.58       86.60    251.88 o
  -7  13   6     1654.54     1028.84    235.51 o
  -6  13   6     1659.37     1505.25    233.60 o
  -5  13   6      193.90       80.39    165.76 o
  -4  13   6     3377.85     3741.25    267.49 o
  -3  13   6     1117.63     1094.64    164.67 o
  -2  13   6      124.34       94.85    122.87 o
  -1  13   6        2.54       33.00    110.19 o
   0  13   6       12.83       87.14    103.10 o
   1  13   6      116.57       66.62    113.94 o
   2  13   6      806.15      605.96    118.37 o
   3  13   6       20.68       95.19    125.87 o
   4  13   6     3110.07     3314.20    212.53 o
   5  13   6     1587.10     1378.63    213.28 o
   6  13   6      323.06      538.25    203.33 o
   7  13   6     1662.74     1668.69    252.69 o
   8  13   6      355.86      511.32    236.40 o
  -7  14   6      355.35      124.30    243.56 o
  -6  14   6       10.15      116.05    206.12 o
  -5  14   6     3020.07     2686.42    273.76 o
  -4  14   6        7.09      118.30    175.99 o
  -3  14   6     1800.03     1669.03    190.85 o
  -2  14   6     1086.38      813.72    150.62 o
  -1  14   6      223.64      181.51    126.55 o
   0  14   6        8.67      183.69    121.23 o
   1  14   6      558.60      375.09    127.51 o
   2  14   6      269.15      166.64    120.96 o
   3  14   6     3690.13     3985.62    179.53 o
   4  14   6      285.85      222.28    153.08 o
   5  14   6      894.20     1096.76    173.46 o
   6  14   6     1506.00     1146.26    242.88 o
   7  14   6       43.60      239.74    238.38 o
  -6  15   6     1590.00     1323.40    264.76 o
  -5  15   6       12.31       90.41    191.80 o
  -4  15   6      766.60      660.78    224.19 o
  -3  15   6     4562.04     4856.89    316.45 o
  -2  15   6     1989.97     2063.42    207.62 o
  -1  15   6      506.06      548.82    157.98 o
   0  15   6     3669.12     4171.77    231.28 o
   1  15   6     3184.82     2816.32    194.33 o
   2  15   6       12.54        1.36    127.57 o
   3  15   6     1503.06     1239.67    158.87 o
   4  15   6     1681.25     1357.56    195.69 o
   5  15   6     1791.03     1793.95    199.99 o
   6  15   6       88.17      229.17    255.97 o
  -5  16   6     2683.24     2449.07    304.51 o
  -4  16   6     1822.77     2170.74    283.31 o
  -3  16   6        7.70       57.68    207.90 o
  -2  16   6     2476.53     2785.36    275.88 o
  -1  16   6     4287.53     4860.50    295.86 o
   0  16   6      224.21      113.46    149.73 o
   1  16   6      837.52      715.67    167.33 o
   2  16   6     3342.99     3161.81    219.90 o
   3  16   6     1664.04     1682.94    179.87 o
   4  16   6       12.73      240.63    192.08 o
   5  16   6     2180.16     1860.63    239.53 o
  -3  17   6      921.02      662.42    232.65 o
  -2  17   6      667.70      516.30    226.78 o
  -1  17   6       87.78      112.71    220.85 o
   0  17   6        8.58       97.78    172.99 o
   1  17   6      232.03      247.92    181.24 o
   2  17   6      135.97      170.60    172.17 o
   3  17   6        0.08      127.71    169.24 o
 -12   1   7     4758.71     6459.85    532.18 o
 -11   1   7     2018.86     2117.42    348.15 o
 -10   1   7      446.92      568.73    189.83 o
  -9   1   7     5147.93     6031.04    304.45 o
  -8   1   7     2451.03     2674.01    213.42 o
  -7   1   7        0.00       84.00    110.05 o
  -6   1   7     1266.13     1239.54    132.42 o
  -5   1   7     2472.03     2422.07    147.28 o
  -4   1   7     4352.52     4379.12    154.03 o
  -3   1   7       86.64       69.14     70.91 o
  -2   1   7      504.20      401.75     82.57 o
  -1   1   7    11067.70    10708.19    258.97 o
   0   1   7     4090.69     4055.10    159.42 o
   1   1   7     1886.70     2490.60    146.46 o
   2   1   7    10280.74    10189.24    214.99 o
   3   1   7     2045.35     1779.15     79.09 o
   4   1   7      285.10      126.48     92.32 o
   5   1   7     1090.43      678.44    105.41 o
   6   1   7      883.43      648.44    116.12 o
   7   1   7     8087.97     7170.27    216.42 o
   8   1   7      489.34      481.52    115.10 o
   9   1   7     1577.04     1615.65    171.08 o
  10   1   7     5072.69     4290.00    228.08 o
  11   1   7      408.59      353.27    191.05 o
 -11   2   7     2327.86     2974.71    392.88 o
 -10   2   7     1694.73     2245.47    239.67 o
  -9   2   7     1409.05     1277.79    194.05 o
  -8   2   7        2.87      132.76    134.87 o
  -7   2   7    10486.90     9884.18    299.61 o
  -6   2   7    14010.75    13599.04    295.92 o
  -5   2   7      505.53      351.70     94.64 o
  -4   2   7     7324.61     7300.64    192.76 o
  -3   2   7    20958.15    20242.99    340.11 o
  -2   2   7      789.50      822.93     82.03 o
  -1   2   7      439.79      335.40     55.57 o
   0   2   7     1549.29     1510.98    123.89 o
   1   2   7     7918.86     8031.59    193.30 o
   2   2   7     6269.64     5994.15    165.96 o
   3   2   7     1060.14     1136.78     97.50 o
   4   2   7    17096.91    15911.26    286.85 o
   5   2   7    22076.66    20812.06    304.24 o
   6   2   7       63.62       23.59     85.37 o
   7   2   7     2717.69     3041.05    157.98 o
   8   2   7     3934.42     3624.85    171.49 o
   9   2   7      368.91      425.20    137.53 o
  10   2   7      187.34       93.41    156.08 o
  11   2   7        3.97       80.05    183.90 o
 -11   3   7     2587.78     3116.26    437.61 o
 -10   3   7      456.95      472.05    241.31 o
  -9   3   7     2897.11     3260.00    265.44 o
  -8   3   7     2443.49     2712.13    235.31 o
  -7   3   7     1291.68     1253.65    163.99 o
  -6   3   7     1319.76     1336.77    165.55 o
  -5   3   7     1284.62     1016.78    124.92 o
  -4   3   7     1689.34     1561.64    126.76 o
  -3   3   7     1305.19     1386.75    115.30 o
  -2   3   7     2400.97     2413.48    121.16 o
  -1   3   7    16475.26    15948.21    306.76 o
   0   3   7     8041.01     8136.39    226.17 o
   1   3   7     3182.45     3134.20    152.33 o
   2   3   7     5385.99     5019.99    166.58 o
   3   3   7     1956.73     1971.43    118.98 o
   4   3   7      165.46      186.90     79.16 o
   5   3   7        8.66       33.96     96.62 o
   6   3   7      801.76      824.43    124.30 o
   7   3   7     2860.65     2835.82    137.94 o
   8   3   7     1163.89     1340.52    141.21 o
   9   3   7     1696.68     1785.90    181.78 o
  10   3   7     4432.09     4134.06    237.08 o
  11   3   7     1165.61     1299.68    232.99 o
 -11   4   7      259.31      142.85    421.45 o
 -10   4   7      334.55      208.24    237.69 o
  -9   4   7      315.06      271.44    177.69 o
  -8   4   7      620.65      518.62    201.21 o
  -7   4   7      494.01      438.23    141.76 o
  -6   4   7       60.66       25.71    106.78 o
  -5   4   7       62.52       51.28     94.44 o
  -4   4   7       13.81       27.55     88.98 o
  -3   4   7       43.83      109.23     83.12 o
  -2   4   7      561.21      438.36     84.21 o
  -1   4   7     1275.84     1227.74     78.89 o
   0   4   7     2614.18     3404.34    199.85 o
   1   4   7     4317.59     4429.23    175.03 o
   2   4   7      102.64       59.39     87.96 o
   3   4   7       15.57       45.48     88.98 o
   4   4   7       57.58       84.82     92.19 o
   5   4   7        0.68       51.41     83.05 o
   6   4   7      111.54      121.30     93.82 o
   7   4   7        1.06       23.46    101.46 o
   8   4   7       13.59       58.37    118.85 o
   9   4   7      373.38      193.58    154.10 o
  10   4   7      152.65      166.44    180.08 o
  11   4   7       34.33      196.30    203.67 o
 -11   5   7     2680.59     2963.87    605.69 o
 -10   5   7       50.98        0.00    247.92 o
  -9   5   7     5199.83     6178.86    358.45 o
  -8   5   7     2008.64     2264.36    226.72 o
  -7   5   7     1165.86     1297.83    184.17 o
  -6   5   7     2750.52     2787.75    182.74 o
  -5   5   7     1430.41     1350.00    140.53 o
  -4   5   7     4717.07     4988.49    191.53 o
  -3   5   7     3527.12     3805.27    169.44 o
  -2   5   7     2158.66     2274.31    127.51 o
  -1   5   7     6166.93     6078.70    149.26 o
   0   5   7     3202.16     3099.69    172.64 o
   1   5   7      197.37      176.05     98.66 o
   2   5   7     5383.02     5083.67    186.83 o
   3   5   7      309.82      219.90    107.53 o
   4   5   7     3302.79     3373.93    154.44 o
   5   5   7     1151.68     1182.19    125.94 o
   6   5   7     2639.60     2520.32    154.58 o
   7   5   7     2200.02     2635.15    180.35 o
   8   5   7     1324.78     1307.86    157.85 o
   9   5   7     1163.91     1204.01    170.39 o
  10   5   7     3255.06     3485.42    264.22 o
 -11   6   7     2724.30     3913.41    640.74 o
 -10   6   7     1319.88     1837.45    344.54 o
  -9   6   7      953.27     1131.46    223.37 o
  -8   6   7      357.51      290.74    164.87 o
  -7   6   7     3086.47     3599.08    254.40 o
  -6   6   7    15246.34    15112.06    377.27 o
  -5   6   7      627.81      437.34    114.89 o
  -4   6   7    15772.27    16172.00    338.95 o
  -3   6   7     9311.06     9517.00    240.15 o
  -2   6   7     2724.18     2928.48    142.85 o
  -1   6   7      452.93      318.42     76.03 o
   0   6   7     3284.90     3274.45    136.23 o
   1   6   7     4717.16     4543.44    184.44 o
   2   6   7    11777.92    12011.89    322.65 o
   3   6   7     1893.83     2110.12    176.12 o
   4   6   7     8270.59     8078.91    217.92 o
   5   6   7     7172.10     6749.03    205.92 o
   6   6   7      894.27      855.04    130.92 o
   7   6   7     7985.73     7698.78    243.49 o
   8   6   7     3419.48     4438.98    248.60 o
   9   6   7      925.18      845.36    176.74 o
  10   6   7       44.97      158.12    170.53 o
 -10   7   7       23.48      133.03    269.47 o
  -9   7   7     3812.63     3939.73    332.95 o
  -8   7   7     1839.09     2228.77    239.33 o
  -7   7   7      631.71      599.96    163.51 o
  -6   7   7       82.63       47.73    121.10 o
  -5   7   7      622.46      431.88    124.85 o
  -4   7   7       45.05       28.30     92.25 o
  -3   7   7     3662.85     3838.82    171.01 o
  -2   7   7     1874.63     1941.30    130.23 o
  -1   7   7     8732.17     8750.67    199.44 o
   0   7   7     3436.99     3527.42    155.94 o
   1   7   7      960.88     1117.76    146.46 o
   2   7   7     3039.22     3865.48    239.81 o
   3   7   7     2371.87     2548.55    202.85 o
   4   7   7        5.18       40.57     98.94 o
   5   7   7     1452.84     1312.63    162.42 o
   6   7   7     1028.24      883.88    136.64 o
   7   7   7     1106.46     1248.81    164.60 o
   8   7   7     2319.39     2702.38    213.15 o
   9   7   7      585.83      561.98    187.44 o
  10   7   7     3454.29     3689.29    305.13 o
 -10   8   7      805.95      333.36    460.32 o
  -9   8   7      106.20      155.33    213.08 o
  -8   8   7      276.05      157.10    179.60 o
  -7   8   7       62.14       86.32    148.58 o
  -6   8   7        4.51      163.44    139.71 o
  -5   8   7      103.95      127.10    110.80 o
  -4   8   7        4.95       43.30     97.37 o
  -3   8   7        5.70       69.28     93.96 o
  -2   8   7     1216.25     1145.99    116.26 o
  -1   8   7       89.41      110.66     81.69 o
   0   8   7      733.61      644.28    110.53 o
   1   8   7     3007.43     3175.92    152.39 o
   2   8   7     1129.62     1034.91    162.76 o
   3   8   7      408.79      280.24    122.73 o
   4   8   7      369.35      414.77    130.85 o
   5   8   7      612.77      390.29    132.48 o
   6   8   7     1161.18      992.02    152.33 o
   7   8   7      264.98      204.69    138.21 o
   8   8   7       74.03      124.37    156.21 o
   9   8   7      714.41      594.71    206.26 o
  10   8   7       12.83      136.51    208.37 o
 -10   9   7      666.05      615.51    486.64 o
  -9   9   7     3472.95     3374.75    323.54 o
  -8   9   7     3907.96     4231.91    343.38 o
  -7   9   7       21.24        0.00    156.62 o
  -6   9   7     1385.83     1136.17    186.21 o
  -5   9   7     4863.58     5086.61    256.31 o
  -4   9   7     4966.58     5147.50    219.69 o
  -3   9   7       18.14      167.05    107.66 o
  -2   9   7     1458.01     1517.60    130.30 o
  -1   9   7    10810.37    10273.92    237.76 o
   0   9   7     1952.47     1973.82    128.80 o
   1   9   7      665.16      378.22    101.80 o
   2   9   7     4244.17     4098.74    220.03 o
   3   9   7     7399.41     7244.53    247.58 o
   4   9   7      150.21       35.05    146.46 o
   5   9   7      337.50      413.88    132.96 o
   6   9   7     3418.30     3399.78    218.60 o
   7   9   7     3427.65     3856.55    253.72 o
   8   9   7       25.97      100.23    164.53 o
   9   9   7       83.30       13.98    200.81 o
  -9  10   7     1831.94     2002.80    364.93 o
  -8  10   7       12.43      141.07    228.97 o
  -7  10   7     5041.24     5548.42    366.22 o
  -6  10   7     7851.96     7553.06    304.17 o
  -5  10   7      474.64      366.43    136.17 o
  -4  10   7     3628.70     3404.21    196.24 o
  -3  10   7     6093.76     6187.79    218.81 o
  -2  10   7      542.42      504.77    113.73 o
  -1  10   7      507.49      423.36    108.89 o
   0  10   7     1134.49     1161.67    119.26 o
   1  10   7     3492.82     3987.39    207.15 o
   2  10   7     3136.55     3154.72    217.92 o
   3  10   7        4.50       26.18    131.12 o
   4  10   7     6999.09     7322.67    274.72 o
   5  10   7     9902.70     9617.57    298.65 o
   6  10   7       13.69      109.23    149.87 o
   7  10   7     3592.56     3792.18    259.24 o
   8  10   7     4112.77     4368.41    281.13 o
   9  10   7      806.92      681.24    232.24 o
  -9  11   7     2492.56     1790.34    352.45 o
  -8  11   7      744.70      547.87    243.08 o
  -7  11   7      335.49      328.38    193.99 o
  -6  11   7      385.96      609.30    191.87 o
  -5  11   7       22.71       46.71    146.12 o
  -4  11   7      337.84      287.13    130.10 o
  -3  11   7      692.43      645.64    134.39 o
  -2  11   7      863.79      541.53    125.73 o
  -1  11   7     3801.22     4236.07    247.03 o
   0  11   7     3094.75     3210.49    177.28 o
   1  11   7     3647.73     3757.41    196.65 o
   2  11   7     5572.10     5812.10    209.40 o
   3  11   7      414.94      460.04    169.99 o
   4  11   7      327.13      239.33    155.12 o
   5  11   7       37.12       98.73    149.26 o
   6  11   7       17.94       20.32    158.46 o
   7  11   7      841.75      734.08    191.87 o
   8  11   7     1432.13     1144.55    242.06 o
  -8  12   7      693.83      499.73    256.17 o
  -7  12   7      554.50      173.94    217.10 o
  -6  12   7      262.58      240.56    195.15 o
  -5  12   7      122.41        7.30    166.71 o
  -4  12   7     1008.28      895.34    165.28 o
  -3  12   7      422.33      219.76    130.37 o
  -2  12   7     1246.81     1218.13    160.17 o
  -1  12   7      111.68      197.33    122.66 o
   0  12   7     3308.85     3330.30    177.89 o
   1  12   7     1554.24     1449.21    125.94 o
   2  12   7      170.09       70.37    120.21 o
   3  12   7      460.90      467.27    164.46 o
   4  12   7        7.25       33.68    161.73 o
   5  12   7        6.44      107.26    181.78 o
   6  12   7       76.36      127.10    190.85 o
   7  12   7      285.21      246.69    195.15 o
  -7  13   7      513.55      408.29    223.99 o
  -6  13   7      665.98      358.31    212.67 o
  -5  13   7     7888.97     8094.25    362.27 o
  -4  13   7     1989.58     2084.01    229.99 o
  -3  13   7      222.59      185.26    152.46 o
  -2  13   7     2300.84     2459.98    198.08 o
  -1  13   7     2312.93     2589.53    180.21 o
   0  13   7     1753.02     1774.04    153.69 o
   1  13   7      158.68       91.30    111.89 o
   2  13   7     3923.45     3842.91    225.42 o
   3  13   7     7222.25     6920.72    239.60 o
   4  13   7      974.28      878.43    203.33 o
   5  13   7      219.49       62.53    193.78 o
   6  13   7     4047.35     4431.35    326.33 o
   7  13   7     3300.76     3650.29    318.49 o
  -6  14   7     1174.35     1139.37    252.42 o
  -5  14   7      539.57      760.33    228.76 o
  -4  14   7     1805.92     1679.26    248.06 o
  -3  14   7     5646.03     6483.58    325.17 o
  -2  14   7     1288.41     1046.03    165.96 o
  -1  14   7      115.67       45.27    127.85 o
   0  14   7     2497.91     2577.46    184.17 o
   1  14   7     2662.53     2612.78    186.62 o
   2  14   7      991.88      857.70    170.26 o
   3  14   7      101.65      261.22    149.60 o
   4  14   7     4557.39     4336.98    316.17 o
   5  14   7     1974.67     1893.91    272.47 o
   6  14   7       15.96      150.83    226.85 o
  -5  15   7       80.67      151.71    230.81 o
  -4  15   7      256.58      271.72    223.03 o
  -3  15   7      384.75      383.27    211.17 o
  -2  15   7        0.70       35.39    146.73 o
  -1  15   7     2100.37     1962.37    189.08 o
   0  15   7      631.29      693.58    165.49 o
   1  15   7      545.06      476.14    145.30 o
   2  15   7     1531.68     1361.11    191.19 o
   3  15   7       27.80      183.28    170.53 o
   4  15   7       25.19      108.01    228.97 o
  -3  16   7      224.96      255.83    204.69 o
  -2  16   7     1977.78     2142.44    275.13 o
  -1  16   7      302.89      258.42    186.76 o
   0  16   7      888.55      719.35    171.42 o
   1  16   7      657.89      479.14    166.17 o
   2  16   7       37.30      233.33    152.80 o
   3  16   7     1224.42      843.99    211.51 o
 -11   0   8     4312.69     5249.30    667.05 o
 -10   0   8       50.81        0.00    275.26 o
  -9   0   8     5097.67     6262.87    466.52 o
  -8   0   8     8317.42     8580.07    433.25 o
  -7   0   8        4.53       55.71    166.99 o
  -6   0   8      592.42      567.91    174.83 o
  -5   0   8     2931.95     2987.12    240.83 o
  -4   0   8     1356.79     1089.60    216.90 o
  -3   0   8     7725.67     7752.30    266.94 o
  -2   0   8      292.96      264.90     94.71 o
  -1   0   8    11320.78    11607.96    409.79 o
   0   0   8    13930.57    13321.59    430.79 o
   1   0   8     1471.56     1560.62    195.55 o
   2   0   8    12468.30    12652.90    401.00 o
   3   0   8     5310.22     5457.26    247.51 o
   4   0   8      392.22      352.18    119.60 o
   5   0   8      315.39      170.12    212.40 o
   6   0   8     1830.19     1118.92    297.70 o
   7   0   8     7119.71     6787.42    351.77 o
   8   0   8     3266.65     3983.10    400.11 o
   9   0   8     1812.12     2230.33    266.26 o
  10   0   8     8065.86     7772.55    369.84 o
 -11   1   8      832.83      442.86    305.26 o
 -10   1   8      304.75      277.45    214.71 o
  -9   1   8     1320.13     1395.88    215.53 o
  -8   1   8     1561.10     1522.57    188.12 o
  -7   1   8     1787.06     1444.50    157.10 o
  -6   1   8     6175.39     6318.92    212.33 o
  -5   1   8     2280.08     2371.82    175.58 o
  -4   1   8     1173.43     1077.19    112.23 o
  -3   1   8     7742.16     7360.58    206.46 o
  -2   1   8       18.55       40.57     64.98 o
  -1   1   8       45.30       33.34    101.73 o
   0   1   8      582.38      585.91    115.23 o
   1   1   8     2162.27     2225.42    157.71 o
   2   1   8     4225.11     3933.46    170.12 o
   3   1   8     2910.47     2575.35    137.32 o
   4   1   8     1739.93     2109.31    124.30 o
   5   1   8     4891.72     5218.00    397.79 o
   6   1   8      769.76      603.37    143.60 o
   7   1   8      244.40      229.31    185.05 o
   8   1   8     3564.86     2885.59    178.92 o
   9   1   8      325.61      348.22    141.21 o
  10   1   8       55.31      146.12    172.10 o
 -11   2   8       20.53        0.00    274.58 o
 -10   2   8        0.06        5.05    215.53 o
  -9   2   8      151.54      111.28    188.19 o
  -8   2   8      422.37      162.08    161.67 o
  -7   2   8      712.51      473.41    143.39 o
  -6   2   8      249.36      205.85    136.44 o
  -5   2   8      236.54      182.60    103.50 o
  -4   2   8      207.17      144.35     96.14 o
  -3   2   8       11.74       28.57     77.53 o
  -2   2   8        2.28       71.53     66.21 o
  -1   2   8      953.08      921.86    148.51 o
   0   2   8      394.47      284.47    123.76 o
   1   2   8      271.29      210.49    112.03 o
   2   2   8       70.78       75.14     99.00 o
   3   2   8       54.10       44.12     99.55 o
   4   2   8       16.25        9.55     86.32 o
   5   2   8       14.90       72.89    105.07 o
   6   2   8        2.25        0.00     99.28 o
   7   2   8      207.67       47.46    124.64 o
   8   2   8        0.21      101.25    155.87 o
   9   2   8        1.82       93.21    139.57 o
  10   2   8        1.68       34.64    168.89 o
 -10   3   8     1089.13     1081.48    239.26 o
  -9   3   8     2341.58     2702.45    261.90 o
  -8   3   8      227.11      481.52    212.67 o
  -7   3   8      502.96      420.22    150.55 o
  -6   3   8     6194.41     6545.97    250.38 o
  -5   3   8     1263.40     1447.09    140.19 o
  -4   3   8     1686.73     1428.14    131.19 o
  -3   3   8     6249.58     6047.33    183.62 o
  -2   3   8     5460.69     5763.14    164.05 o
  -1   3   8       33.04       75.75    114.35 o
   0   3   8      959.69      879.93    142.98 o
   1   3   8     1870.08     2065.39    179.26 o
   2   3   8     7450.13     7622.48    242.81 o
   3   3   8      651.16      681.31    116.39 o
   4   3   8     2643.20     2864.32    156.96 o
   5   3   8     8390.99     7890.65    198.76 o
   6   3   8       97.98       81.48    118.85 o
   7   3   8     2706.82     3014.87    198.42 o
   8   3   8     1040.65     1246.90    155.94 o
   9   3   8     1062.14     1047.39    178.10 o
  10   3   8      368.47      425.54    181.51 o
 -10   4   8        2.10      135.35    210.62 o
  -9   4   8     4030.91     4836.57    333.49 o
  -8   4   8     5656.13     6715.55    339.97 o
  -7   4   8      158.99      208.37    147.08 o
  -6   4   8      230.69      228.90    122.80 o
  -5   4   8     1397.44     1185.19    162.49 o
  -4   4   8     4558.01     5019.03    204.21 o
  -3   4   8     3443.61     3478.73    162.83 o
  -2   4   8      609.22      543.64     88.10 o
  -1   4   8    10807.49    10808.70    322.79 o
   0   4   8     6368.39     6188.41    242.74 o
   1   4   8      539.33      495.30    129.69 o
   2   4   8     6575.86     6553.74    233.94 o
   3   4   8     5363.22     5422.55    229.92 o
   4   4   8      533.06      494.27    126.69 o
   5   4   8        4.75       95.94     96.48 o
   6   4   8     1587.97     1659.90    174.08 o
   7   4   8     4732.23     4138.36    184.37 o
   8   4   8     3181.96     3261.16    198.28 o
   9   4   8      537.27      504.91    172.30 o
  10   4   8     8674.83     7563.63    310.51 o
 -10   5   8     1126.54     1123.83    250.72 o
  -9   5   8      313.02      579.85    214.51 o
  -8   5   8     1056.24      922.88    196.78 o
  -7   5   8      373.44      359.74    158.94 o
  -6   5   8     8053.46     7655.00    253.72 o
  -5   5   8     1774.38     1652.40    157.71 o
  -4   5   8     1209.66     1054.07    130.51 o
  -3   5   8     4003.71     4268.52    181.37 o
  -2   5   8       35.09       74.25     84.28 o
  -1   5   8     1167.16      987.12    106.71 o
   0   5   8      189.71       39.48    125.60 o
   1   5   8     2634.26     3367.93    226.58 o
   2   5   8     5683.79     5897.94    248.88 o
   3   5   8      380.73      337.52    129.14 o
   4   5   8     2941.59     3173.33    195.01 o
   5   5   8     9270.25     9060.23    231.90 o
   6   5   8      203.83      148.71    117.01 o
   7   5   8     2076.44     2310.04    179.60 o
   8   5   8     1688.57     1814.13    187.78 o
   9   5   8       20.43      163.30    166.51 o
 -10   6   8      403.20      290.81    257.06 o
  -9   6   8        7.44       28.02    194.12 o
  -8   6   8       78.55       69.28    176.05 o
  -7   6   8      641.33      740.15    181.85 o
  -6   6   8       96.31      126.14    129.62 o
  -5   6   8      374.02      195.28    123.48 o
  -4   6   8       52.90       67.98    105.82 o
  -3   6   8        7.04       37.43     92.12 o
  -2   6   8        5.10       56.32     86.53 o
  -1   6   8        3.49       24.89     91.16 o
   0   6   8      244.16      161.87    130.71 o
   1   6   8      147.21      130.51    125.73 o
   2   6   8      973.04      820.68    153.42 o
   3   6   8      431.65      385.04    135.07 o
   4   6   8      768.08      661.74    136.92 o
   5   6   8      162.82      106.85    118.10 o
   6   6   8      761.65      698.97    137.80 o
   7   6   8      126.10      214.65    139.30 o
   8   6   8        5.49        1.02    149.26 o
   9   6   8       36.06       20.25    171.28 o
 -10   7   8     1398.16     1639.99    303.29 o
  -9   7   8     1104.70     1193.78    260.81 o
  -8   7   8      117.90       99.96    181.78 o
  -7   7   8     1226.18     1587.76    214.37 o
  -6   7   8     3960.86     4247.73    252.28 o
  -5   7   8       33.04      109.10    115.51 o
  -4   7   8     1787.38     1745.54    158.46 o
  -3   7   8     3904.25     3743.36    187.44 o
  -2   7   8     2670.95     2924.25    159.76 o
  -1   7   8       49.32       62.18    105.01 o
   0   7   8     1578.43     1339.90    178.24 o
   1   7   8     3462.19     3855.25    251.88 o
   2   7   8     1893.94     1740.08    190.30 o
   3   7   8      238.11      201.83    145.37 o
   4   7   8     1955.35     2279.90    186.55 o
   5   7   8     3277.80     3451.12    203.19 o
   6   7   8     1758.59     1686.63    172.85 o
   7   7   8     1212.02     1274.58    175.30 o
   8   7   8     2955.19     3625.47    265.58 o
   9   7   8     1638.75     1375.57    216.28 o
  -9   8   8     5500.50     5635.36    409.59 o
  -8   8   8     4002.30     4050.13    313.65 o
  -7   8   8     1303.74     1401.68    214.24 o
  -6   8   8     1568.84     1453.30    193.65 o
  -5   8   8     1176.77      920.23    151.23 o
  -4   8   8     4302.39     4355.19    214.31 o
  -3   8   8     4260.52     4507.85    205.24 o
  -2   8   8      297.39      147.69    103.78 o
  -1   8   8    10222.36    10463.48    235.31 o
   0   8   8    12108.88    12373.95    307.45 o
   1   8   8      219.56      157.17    150.62 o
   2   8   8     9511.52     8956.25    309.42 o
   3   8   8     3730.62     4123.01    225.35 o
   4   8   8     1248.97     1250.17    165.35 o
   5   8   8       16.36        6.48    159.48 o
   6   8   8      545.09      550.32    152.19 o
   7   8   8     4264.63     4346.46    251.33 o
   8   8   8     4026.35     4552.79    264.83 o
  -9   9   8      586.44      589.87    269.88 o
  -8   9   8      235.82      121.91    228.08 o
  -7   9   8     1076.58     1104.19    213.69 o
  -6   9   8     2718.35     3110.88    254.33 o
  -5   9   8     1561.27     1431.68    171.28 o
  -4   9   8     1552.77     1507.84    157.78 o
  -3   9   8     1032.28     1024.75    141.35 o
  -2   9   8      154.81       84.07    103.10 o
  -1   9   8      392.57      312.56    102.82 o
   0   9   8      138.44      158.39    116.32 o
   1   9   8      238.71      137.73    153.89 o
   2   9   8      899.71      762.65    181.99 o
   3   9   8      576.72      403.11    150.62 o
   4   9   8     1929.77     1842.57    190.65 o
   5   9   8     3989.03     4150.08    257.13 o
   6   9   8      249.86      260.88    155.60 o
   7   9   8     2532.10     2406.52    226.78 o
   8   9   8      559.61      634.05    202.37 o
  -8  10   8       33.56      172.64    220.17 o
  -7  10   8      565.67      492.91    223.85 o
  -6  10   8      101.54        7.16    163.51 o
  -5  10   8       56.72      103.16    152.39 o
  -4  10   8     1259.56      989.09    159.55 o
  -3  10   8      781.40      556.39    142.23 o
  -2  10   8      700.83      472.25    122.80 o
  -1  10   8        1.57      164.60    106.03 o
   0  10   8      981.94     1008.73    150.76 o
   1  10   8      101.55      135.35    164.19 o
   2  10   8      150.86      173.39    147.01 o
   3  10   8      594.74      592.66    162.83 o
   4  10   8     2368.12     1863.63    236.19 o
   5  10   8     1047.41      713.28    180.21 o
   6  10   8     1021.24      866.09    196.24 o
   7  10   8      213.44      309.70    188.46 o
  -7  11   8     1904.17     1578.35    279.01 o
  -6  11   8     1586.32     1797.49    261.49 o
  -5  11   8     2308.75     2602.49    234.69 o
  -4  11   8      183.95       76.71    145.78 o
  -3  11   8     4822.76     4820.21    233.33 o
  -2  11   8     3250.79     3143.60    198.28 o
  -1  11   8     1440.53     1305.95    148.71 o
   0  11   8      188.47      288.76    138.14 o
   1  11   8     2204.11     2206.47    157.10 o
   2  11   8      714.62      555.44    166.64 o
   3  11   8        4.25       86.66    160.58 o
   4  11   8     3623.14     3529.67    276.90 o
   5  11   8     3038.54     3110.06    258.49 o
   6  11   8      465.53      317.95    201.21 o
   7  11   8      100.19      193.37    200.60 o
  -7  12   8      270.61      237.15    243.28 o
  -6  12   8      346.97      370.59    222.22 o
  -5  12   8     1397.96     1431.14    229.58 o
  -4  12   8     3039.58     2852.11    230.19 o
  -3  12   8      410.30      571.12    159.14 o
  -2  12   8      103.86      108.48    140.80 o
  -1  12   8     7602.46     8006.09    260.06 o
   0  12   8     4828.88     5455.90    281.06 o
   1  12   8        8.55       28.98    127.03 o
   2  12   8     2130.91     2051.62    225.35 o
   3  12   8     3017.05     2716.56    274.24 o
   4  12   8      417.29      461.34    191.19 o
   5  12   8        0.16       61.03    187.85 o
   6  12   8      482.40      520.80    220.24 o
  -6  13   8     2699.50     2679.06    321.22 o
  -5  13   8     1502.41     1363.50    249.97 o
  -4  13   8     1309.07     1373.18    211.58 o
  -3  13   8     2558.11     2830.57    221.67 o
  -2  13   8      193.38      260.54    152.87 o
  -1  13   8      144.62      122.53    143.39 o
   0  13   8      131.64      109.85    122.05 o
   1  13   8       39.08       72.82    147.96 o
   2  13   8     1340.23      938.02    228.97 o
   3  13   8     1170.54      821.90    218.40 o
   4  13   8     1733.57     1610.39    229.10 o
   5  13   8     3536.99     3981.33    318.15 o
  -4  14   8      826.01      727.33    226.51 o
  -3  14   8      154.49      235.31    170.26 o
  -2  14   8       57.05       54.00    160.98 o
  -1  14   8       48.74      -46.43    145.03 o
   0  14   8        0.00      211.85    139.64 o
   1  14   8      843.59      491.61    175.78 o
   2  14   8      103.66      258.63    150.08 o
   3  14   8      708.54      675.92    224.33 o
   4  14   8      448.36      462.84    221.19 o
  -2  15   8     3460.80     3725.22    247.92 o
  -1  15   8      405.13      319.38    163.92 o
   0  15   8      699.56      532.73    153.55 o
   1  15   8     3670.45     3422.55    252.01 o
   2  15   8      565.97      359.54    179.87 o
 -10   1   9      303.19      364.31    243.01 o
  -9   1   9     1134.61     1095.05    234.76 o
  -8   1   9     2914.13     3566.08    285.49 o
  -7   1   9      570.36      524.21    155.87 o
  -6   1   9        5.81       12.14    121.57 o
  -5   1   9     1254.16     1186.97    144.96 o
  -4   1   9      333.34      155.73    105.14 o
  -3   1   9     2450.09     2515.55    142.64 o
  -2   1   9       29.31       54.41    138.14 o
  -1   1   9     4288.96     4614.42    239.26 o
   0   1   9     6463.68     6257.96    241.44 o
   1   1   9      378.38      497.61    137.39 o
   2   1   9     4508.33     4434.89    213.08 o
   3   1   9     4475.72     4546.51    209.06 o
   4   1   9      344.56      311.33    118.91 o
   5   1   9     1017.40      906.52    174.62 o
   6   1   9      446.10      408.63    267.22 o
   7   1   9     1808.04     1737.36    434.88 o
   8   1   9     2988.07     1435.16    590.21 o
   9   1   9        0.13      162.42    232.24 o
 -10   2   9      707.49      277.38    239.13 o
  -9   2   9     2717.10     3544.33    359.95 o
  -8   2   9     1075.20     1388.73    254.74 o
  -7   2   9      704.75      614.55    164.80 o
  -6   2   9    10544.38    10338.42    293.33 o
  -5   2   9     4976.28     5268.66    220.78 o
  -4   2   9     1033.71      841.81    124.57 o
  -3   2   9    15992.72    15919.24    309.56 o
  -2   2   9     7894.80     7837.81    288.83 o
  -1   2   9     2126.13     2054.48    207.56 o
   0   2   9      159.85      226.24    135.76 o
   1   2   9      688.96      669.10    150.42 o
   2   2   9     9409.38     9468.25    288.22 o
   3   2   9     4359.33     4366.98    207.35 o
   4   2   9      845.25     1140.40    150.28 o
   5   2   9    14000.07    13514.55    399.16 o
   6   2   9     3493.10     3476.01    209.40 o
   7   2   9      253.06      366.02    191.60 o
   8   2   9     3172.76     3545.21    317.06 o
   9   2   9      757.78      732.58    238.72 o
  -9   3   9     1043.07      931.41    233.53 o
  -8   3   9     4305.10     4502.19    305.67 o
  -7   3   9        7.55       19.30    152.73 o
  -6   3   9        5.04       29.46    120.28 o
  -5   3   9        4.64        9.55    116.46 o
  -4   3   9     1577.22     1501.57    141.96 o
  -3   3   9     2484.70     2551.42    168.69 o
  -2   3   9      832.40      708.31    169.64 o
  -1   3   9      998.00      779.42    165.35 o
   0   3   9     5857.93     5933.60    257.54 o
   1   3   9      114.37      123.21    125.94 o
   2   3   9      667.70      682.40    146.87 o
   3   3   9     4162.88     4062.33    219.22 o
   4   3   9      129.96      186.15    132.01 o
   5   3   9       44.65      200.05    125.94 o
   6   3   9      182.86      176.26    151.85 o
   7   3   9     1597.53     1751.13    243.15 o
   8   3   9     3241.18     3413.14    295.51 o
   9   3   9      232.55      131.53    220.51 o
  -9   4   9      571.38      465.77    220.37 o
  -8   4   9     1494.68     1589.67    225.15 o
  -7   4   9       27.17        0.00    155.12 o
  -6   4   9        6.73       42.62    126.48 o
  -5   4   9       24.55      133.44    121.23 o
  -4   4   9        0.70       16.43    105.41 o
  -3   4   9       31.06       13.09     92.87 o
  -2   4   9      237.74      125.60     98.66 o
  -1   4   9      456.49      540.09    160.03 o
   0   4   9      344.10      381.63    153.35 o
   1   4   9      468.88      420.57    152.94 o
   2   4   9     2206.69     2597.31    227.53 o
   3   4   9      203.79      153.35    146.80 o
   4   4   9        4.80       40.23    136.57 o
   5   4   9      216.97      254.60    131.94 o
   6   4   9        0.35       75.00    116.66 o
   7   4   9       25.77      170.53    133.23 o
   8   4   9      143.27       83.59    163.37 o
  -9   5   9     1278.72     1428.14    261.83 o
  -8   5   9     4473.93     4678.65    325.92 o
  -7   5   9     1845.72     1754.81    221.19 o
  -6   5   9       52.33       39.27    131.39 o
  -5   5   9     1185.26     1213.01    151.23 o
  -4   5   9     2289.71     2389.75    172.03 o
  -3   5   9     2496.45     2617.01    159.35 o
  -2   5   9       12.09      129.55    109.98 o
  -1   5   9     6216.19     5550.54    261.08 o
   0   5   9     5419.73     5743.84    272.67 o
   1   5   9      355.79      197.80    145.92 o
   2   5   9     2115.37     2546.44    239.06 o
   3   5   9     4132.86     3932.44    231.22 o
   4   5   9     2201.33     2398.48    221.12 o
   5   5   9      484.00      484.59    142.17 o
   6   5   9      554.55      238.10    172.17 o
   7   5   9     3067.63     3356.68    217.17 o
   8   5   9     2172.69     2636.10    227.47 o
  -9   6   9      848.06      945.25    256.65 o
  -8   6   9     1543.11     1394.73    238.51 o
  -7   6   9      191.93      283.72    182.33 o
  -6   6   9     7497.27     7749.57    287.60 o
  -5   6   9     4033.33     4086.88    221.81 o
  -4   6   9      367.34      217.71    120.96 o
  -3   6   9     4423.62     4769.20    201.01 o
  -2   6   9     2401.65     2674.35    190.10 o
  -1   6   9      109.09       90.21    160.64 o
   0   6   9      332.80      286.85    161.53 o
   1   6   9     1357.36     1338.06    213.83 o
   2   6   9     4767.61     5319.66    277.51 o
   3   6   9     2101.35     2572.08    242.13 o
   4   6   9     1333.71     1089.39    176.39 o
   5   6   9     8468.72     7890.51    270.90 o
   6   6   9     3133.33     3523.74    217.51 o
   7   6   9      378.87      332.33    157.44 o
   8   6   9     1805.14     1372.36    205.24 o
  -8   7   9     1850.46     1802.27    257.88 o
  -7   7   9      337.23      165.76    189.08 o
  -6   7   9      441.02      307.86    157.30 o
  -5   7   9      601.60      562.19    148.51 o
  -4   7   9      599.44      365.95    130.85 o
  -3   7   9     5258.45     5520.74    222.56 o
  -2   7   9      101.76      125.32    128.87 o
  -1   7   9     3221.10     3583.13    287.33 o
   0   7   9     6537.35     6543.86    333.36 o
   1   7   9      299.09      138.28    168.21 o
   2   7   9     3739.37     4427.53    294.15 o
   3   7   9      450.57      644.01    180.89 o
   4   7   9       87.16      237.15    150.28 o
   5   7   9      245.22      164.74    152.73 o
   6   7   9       25.82      101.25    149.73 o
   7   7   9      417.28      187.58    167.94 o
   8   7   9     4737.99     4740.43    268.04 o
  -8   8   9      115.47      377.34    224.67 o
  -7   8   9      560.54      465.23    205.31 o
  -6   8   9      699.26      387.09    181.51 o
  -5   8   9        2.55      152.26    137.94 o
  -4   8   9      902.83      494.75    136.51 o
  -3   8   9       21.37      180.08    124.17 o
  -2   8   9      675.94      580.94    110.94 o
  -1   8   9     1210.34     1155.33    140.32 o
   0   8   9      155.22      179.19    191.80 o
   1   8   9     1663.18     1843.72    243.08 o
   2   8   9        3.43      147.83    181.92 o
   3   8   9      633.26      562.66    159.35 o
   4   8   9      286.80      233.94    157.58 o
   5   8   9       87.27      252.49    188.33 o
   6   8   9       99.56       56.53    168.28 o
   7   8   9     1306.68     1513.91    212.33 o
  -7   9   9     2427.00     2622.88    277.45 o
  -6   9   9      145.79       78.07    183.35 o
  -5   9   9      137.62      165.76    150.89 o
  -4   9   9     3604.08     3641.08    225.62 o
  -3   9   9     1336.82     1385.86    160.10 o
  -2   9   9      103.19        0.00    110.53 o
  -1   9   9     1598.21     1364.04    164.87 o
   0   9   9     5357.86     5567.45    356.68 o
   1   9   9     1722.64     1481.59    243.49 o
   2   9   9      225.16      337.18    191.80 o
   3   9   9     1500.80     1501.16    192.35 o
   4   9   9     5119.86     5628.27    270.22 o
   5   9   9       12.35       45.48    164.87 o
   6   9   9      101.45       49.03    172.58 o
   7   9   9     1544.07     1595.19    242.67 o
  -7  10   9      569.65      356.68    242.47 o
  -6  10   9     3416.68     3480.85    283.92 o
  -5  10   9     5761.88     6108.36    297.70 o
  -4  10   9      592.67      269.67    155.87 o
  -3  10   9     3597.33     3804.86    217.10 o
  -2  10   9     3402.58     3642.92    199.10 o
  -1  10   9       99.95        8.86    148.03 o
   0  10   9     1040.35      703.67    236.26 o
   1  10   9     2714.82     3058.44    308.61 o
   2  10   9     3665.71     3601.54    263.40 o
   3  10   9     2765.56     2976.14    247.24 o
   4  10   9     2305.77     2193.85    224.26 o
   5  10   9     4570.26     5173.68    309.63 o
   6  10   9     3142.86     3329.68    268.58 o
  -6  11   9      806.34      748.67    217.51 o
  -5  11   9        5.31      133.10    176.74 o
  -4  11   9       63.04       68.87    166.58 o
  -3  11   9     1074.59      849.38    172.78 o
  -2  11   9     1006.73     1032.25    164.26 o
  -1  11   9     1705.36     1589.05    206.81 o
   0  11   9     5101.74     5512.83    404.54 o
   1  11   9      179.54      117.01    211.58 o
   2  11   9     1460.43     1494.96    217.51 o
   3  11   9      466.88      415.52    188.67 o
   4  11   9       17.36       54.28    182.26 o
   5  11   9       26.82      192.96    195.76 o
  -5  12   9       40.64       48.55    194.19 o
  -4  12   9      365.01      426.57    193.78 o
  -3  12   9        2.65      107.94    163.85 o
  -2  12   9      452.80      388.86    158.46 o
  -1  12   9     2046.73     1737.15    226.44 o
   0  12   9       50.40      125.80    162.42 o
   1  12   9     3008.74     3010.23    271.58 o
   2  12   9       18.46       78.75    198.96 o
   3  12   9      166.47      115.98    225.08 o
   4  12   9      468.68      539.68    214.03 o
  -3  13   9      247.05      159.96    174.35 o
  -2  13   9      242.40      205.51    168.35 o
  -1  13   9     3883.09     3610.60    301.92 o
   0  13   9     2204.25     2309.29    209.12 o
   1  13   9     1578.40     1297.63    237.35 o
   2  13   9      264.92      499.05    225.56 o
   3  13   9     1887.15     1797.56    259.38 o
  -8   0  10     4739.88     4054.97    941.29 o
  -7   0  10     1276.80     1505.12    284.88 o
  -6   0  10      284.51      244.85    231.08 o
  -5   0  10       18.39       43.84    173.67 o
  -4   0  10       12.48       10.98    156.83 o
  -3   0  10      988.23      959.64    319.65 o
  -2   0  10      986.40      751.13    300.56 o
  -1   0  10     1996.19     1992.78    344.74 o
   0   0  10    10984.61    11409.61    558.78 o
   1   0  10     1225.62      794.36    279.56 o
   2   0  10      839.97      962.02    265.58 o
   3   0  10     2894.06     2882.86    302.88 o
   4   0  10      450.12      844.06    232.99 o
   5   0  10     1860.82     2314.68    301.99 o
  -8   1  10     1391.89     1238.04    252.22 o
  -7   1  10       80.08      127.51    162.96 o
  -6   1  10     2859.72     2175.51    254.60 o
  -5   1  10     6303.90     6545.97    260.81 o
  -4   1  10     1570.89     1251.81    145.85 o
  -3   1  10     4746.59     4539.83    358.59 o
  -2   1  10     2195.08     2108.49    258.29 o
  -1   1  10      112.76      160.78    173.26 o
   0   1  10       54.30      156.55    169.44 o
   1   1  10      452.71      277.51    167.39 o
   2   1  10     1236.42     1122.19    195.35 o
   3   1  10     4407.50     4412.19    238.51 o
   4   1  10      320.31      304.11    167.60 o
   5   1  10     5628.01     5197.61    239.19 o
  -8   2  10       27.68      187.99    228.56 o
  -7   2  10      360.03      320.27    178.24 o
  -6   2  10       10.84       19.02    148.85 o
  -5   2  10       20.62       83.87    148.10 o
  -4   2  10       11.04       45.55    110.53 o
  -3   2  10       43.40       96.89    111.41 o
  -2   2  10       16.82       97.50    167.39 o
  -1   2  10       34.39      125.12    155.73 o
   0   2  10       65.11       28.36    149.39 o
   1   2  10        9.28       41.39    143.60 o
   2   2  10      565.48      701.76    165.28 o
   3   2  10       30.73       68.73    143.94 o
   4   2  10       91.84       49.43    158.53 o
   5   2  10        4.47       41.80    155.73 o
   6   2  10       31.06      172.92    243.15 o
   7   2  10       95.07      273.42    220.92 o
  -8   3  10      809.30      811.33    222.35 o
  -7   3  10       11.21       27.14    162.28 o
  -6   3  10     2863.85     3001.30    219.97 o
  -5   3  10     4309.08     4651.65    230.53 o
  -4   3  10        4.49       53.05    117.76 o
  -3   3  10      221.92      533.96    128.53 o
  -2   3  10     1129.02     1194.19    212.12 o
  -1   3  10      447.20      451.86    172.44 o
   0   3  10      109.55       44.39    152.94 o
   1   3  10      118.14       28.91    154.03 o
   2   3  10     2552.13     2839.36    242.06 o
   3   3  10      922.32     1053.80    192.62 o
   4   3  10        0.21        6.48    150.28 o
   5   3  10     1927.14     2388.18    197.19 o
   6   3  10     2598.83     3038.67    266.74 o
   7   3  10        2.56       74.19    228.28 o
  -8   4  10     4347.05     5084.70    339.63 o
  -7   4  10     1785.68     2234.29    237.83 o
  -6   4  10      163.21      297.97    156.62 o
  -5   4  10      127.63       97.16    129.96 o
  -4   4  10      786.79      570.10    129.07 o
  -3   4  10     5673.08     5888.74    243.56 o
  -2   4  10      947.15      632.28    202.78 o
  -1   4  10     3005.96     3614.56    277.72 o
   0   4  10    15723.09    15607.90    437.82 o
   1   4  10     2702.89     3309.16    270.76 o
   2   4  10     1188.25     1053.66    213.01 o
   3   4  10     4648.84     4678.72    266.19 o
   4   4  10      859.22      846.59    192.96 o
   5   4  10      103.80      340.11    156.01 o
   6   4  10      106.10      194.19    151.23 o
   7   4  10     1317.59     1556.46    283.99 o
  -7   5  10       12.57       76.16    183.55 o
  -6   5  10     3088.46     3361.05    233.06 o
  -5   5  10     2801.16     2759.79    206.74 o
  -4   5  10      228.34      239.94    126.82 o
  -3   5  10     1472.07     1764.56    246.22 o
  -2   5  10      759.95      744.31    196.37 o
  -1   5  10        4.86      169.10    175.58 o
   0   5  10       11.76      135.89    170.67 o
   1   5  10       67.80       54.62    174.49 o
   2   5  10     1340.56     1218.33    217.37 o
   3   5  10     2097.31     2483.57    249.15 o
   4   5  10       11.88      195.42    179.67 o
   5   5  10     3547.94     3612.10    218.53 o
   6   5  10     2581.23     3344.34    249.22 o
   7   5  10      382.03      488.96    184.92 o
  -7   6  10       13.44      122.39    192.28 o
  -6   6  10       18.65       27.68    149.39 o
  -5   6  10       81.64       98.80    146.60 o
  -4   6  10      598.74      407.41    138.42 o
  -3   6  10       39.60      188.94    144.21 o
  -2   6  10      445.60      332.95    197.19 o
  -1   6  10       59.81      262.51    188.26 o
   0   6  10      673.05      800.56    207.21 o
   1   6  10       20.54       17.05    188.74 o
   2   6  10      187.29      166.71    191.74 o
   3   6  10        0.19       66.41    186.83 o
   4   6  10      827.44      821.49    191.46 o
   5   6  10       35.08      130.57    174.01 o
   6   6  10      787.41      695.56    240.15 o
  -7   7  10        3.56      108.28    202.78 o
  -6   7  10     2378.38     2628.81    239.88 o
  -5   7  10     2947.01     2973.48    218.94 o
  -4   7  10      263.16      256.78    140.67 o
  -3   7  10     1011.00      967.75    166.92 o
  -2   7  10     3265.62     3533.90    296.26 o
  -1   7  10     3002.40     3001.37    284.74 o
   0   7  10        8.96       57.96    198.83 o
   1   7  10      662.18      663.92    218.74 o
   2   7  10     2091.29     2487.73    280.24 o
   3   7  10      822.92      666.03    219.69 o
   4   7  10        0.43       94.44    173.80 o
   5   7  10     2357.86     3016.85    250.03 o
   6   7  10     2749.52     2927.59    261.29 o
  -6   8  10       70.82      170.46    178.03 o
  -5   8  10      300.24      270.69    162.21 o
  -4   8  10     2098.68     2214.17    199.78 o
  -3   8  10     4297.03     4252.57    197.46 o
  -2   8  10      847.59      555.64    229.10 o
  -1   8  10     1902.38     2192.29    286.45 o
   0   8  10     4334.22     4733.95    370.79 o
   1   8  10     2124.95     2457.32    294.35 o
   2   8  10      467.19      260.60    217.31 o
   3   8  10     2992.25     3545.08    287.74 o
   4   8  10     1366.22     1428.48    220.85 o
   5   8  10      274.32      249.35    204.21 o
  -5   9  10     2678.10     2700.33    227.40 o
  -4   9  10        5.43      159.01    157.51 o
  -3   9  10      819.07      802.67    148.51 o
  -2   9  10      827.62      837.65    174.14 o
  -1   9  10      231.78      134.26    240.90 o
   0   9  10        9.55        8.73    215.53 o
   1   9  10       63.12       12.75    217.65 o
   2   9  10     1316.73     1484.32    273.69 o
   3   9  10     2553.34     2526.46    270.83 o
   4   9  10        0.08       23.73    192.55 o
   5   9  10     1921.20     1863.98    296.13 o
  -4  10  10      853.30      971.84    183.83 o
  -3  10  10        0.25      100.85    148.92 o
  -2  10  10        3.40       93.55    170.12 o
  -1  10  10        6.01      347.95    258.69 o
   0  10  10        0.55      232.92    247.92 o
   1  10  10       38.58        4.02    239.13 o
   2  10  10      620.03      226.78    214.24 o
   3  10  10       43.13      130.44    199.58 o
   4  10  10      348.37      414.36    217.44 o
  -3  11  10     1045.95      707.62    176.26 o
  -2  11  10     1599.23     1695.08    230.12 o
  -1  11  10      895.99      632.28    287.95 o
   0  11  10       25.37      159.89    258.22 o
   1  11  10     2026.34     1601.53    312.97 o
   2  11  10     2199.34     2119.19    271.79 o
  -6   1  11       60.56       99.00    163.24 o
  -5   1  11       80.10      277.04    157.44 o
  -4   1  11      928.92      731.08    262.38 o
  -3   1  11     3702.67     3131.60    335.95 o
  -2   1  11     1111.24     1374.34    262.79 o
  -1   1  11       15.68       28.64    206.94 o
   0   1  11     9012.55     8849.26    380.13 o
   1   1  11      880.97      429.91    211.44 o
   2   1  11       12.53       31.57    189.01 o
   3   1  11      900.55     1214.10    227.94 o
   4   1  11     1514.75     1993.05    256.99 o
   5   1  11      312.64      433.86    205.10 o
  -6   2  11     2160.38     2287.54    225.22 o
  -5   2  11     8622.84     8602.23    288.29 o
  -4   2  11     1382.67     1244.17    178.64 o
  -3   2  11     1609.22      964.75    273.63 o
  -2   2  11     2758.77     2644.69    305.33 o
  -1   2  11      314.26      361.93    222.08 o
   0   2  11      933.39      864.31    243.83 o
   1   2  11      479.49      342.56    207.69 o
   2   2  11     1644.50     1397.93    238.99 o
   3   2  11     6848.35     6566.97    343.65 o
   4   2  11      139.57      173.74    208.37 o
   5   2  11     3690.69     4103.92    264.15 o
  -6   3  11       64.91      186.08    214.31 o
  -5   3  11      134.48      217.10    157.98 o
  -4   3  11       77.34      115.44    157.78 o
  -3   3  11     2766.32     2642.31    331.11 o
  -2   3  11     2054.48     2090.76    318.02 o
  -1   3  11      199.44      191.40    230.81 o
   0   3  11     2438.04     2074.74    284.60 o
   1   3  11     2409.04     2259.18    277.45 o
   2   3  11        1.67      232.31    220.10 o
   3   3  11     1413.53     1697.94    277.24 o
   4   3  11       69.96        6.89    205.92 o
   5   3  11      406.93      436.11    197.26 o
  -6   4  11       89.00      136.57    169.03 o
  -5   4  11      316.52      203.12    157.51 o
  -4   4  11      344.46      309.97    166.30 o
  -3   4  11      281.38      350.61    220.85 o
  -2   4  11      228.50      161.19    207.96 o
  -1   4  11       82.61      115.10    201.83 o
   0   4  11      142.35      361.45    197.12 o
   1   4  11        1.66      117.01    207.28 o
   2   4  11       86.20      256.99    209.67 o
   3   4  11       92.43      136.85    212.19 o
   4   4  11        0.08      136.30    200.81 o
   5   4  11      104.13      218.67    196.92 o
  -5   5  11      353.28      308.74    164.26 o
  -4   5  11      229.37      457.52    179.33 o
  -3   5  11     1562.47     1154.31    254.40 o
  -2   5  11      438.81      237.22    218.19 o
  -1   5  11      611.82      555.64    218.81 o
   0   5  11     3772.88     4090.49    341.74 o
   1   5  11     3374.31     3865.28    332.33 o
   2   5  11       52.38       48.34    209.46 o
   3   5  11     2064.64     2587.08    289.72 o
   4   5  11      591.25      705.58    239.88 o
  -5   6  11     5817.90     6083.88    270.63 o
  -4   6  11      463.07      366.15    253.58 o
  -3   6  11      821.03      322.31    231.90 o
  -2   6  11     3624.47     4278.75    346.72 o
  -1   6  11     1098.67     1096.89    243.22 o
   0   6  11       22.78       67.37    220.03 o
   1   6  11       31.89       31.91    218.67 o
   2   6  11     2691.67     3228.77    322.11 o
   3   6  11     5622.87     5232.05    325.24 o
   4   6  11     1093.90     1248.06    222.83 o
  -4   7  11       22.00       68.05    177.28 o
  -3   7  11      611.68      412.86    250.65 o
  -2   7  11     3974.01     4009.96    352.72 o
  -1   7  11       42.23       15.27    240.83 o
   0   7  11     2073.60     2611.49    327.49 o
   1   7  11     1489.95     1251.06    285.22 o
   2   7  11      455.17      454.25    243.97 o
   3   7  11     1207.50     1360.43    276.01 o
  -3   8  11      344.64      184.78    265.04 o
  -2   8  11       28.12       76.37    267.01 o
  -1   8  11     1182.34      712.87    284.67 o
   0   8  11       11.94       31.84    251.74 o
   1   8  11      962.54      857.84    272.26 o
   2   8  11      261.30      246.49    244.99 o
  -1   9  11      516.76      201.08    266.54 o
   0   9  11     1397.13     1465.09    318.36 o
  -3   0  12     2517.07     1344.88    430.18 o
  -2   0  12     4667.33     5082.86    590.01 o
  -1   0  12      511.36        0.00    347.40 o
   0   0  12     7133.11     6550.47    543.16 o
   1   0  12     3584.40     3993.94    501.98 o
   2   0  12      234.33      240.22    335.68 o
  -3   1  12      197.05        9.48    268.65 o
  -2   1  12      658.44      588.71    286.17 o
  -1   1  12        3.57        0.00    254.94 o
   0   1  12      712.85      604.05    260.47 o
   1   1  12       33.48       93.96    246.69 o
   2   1  12        9.66      111.07    242.47 o
  -3   2  12        9.97      112.85    269.94 o
  -2   2  12       66.02       31.37    268.79 o
  -1   2  12       31.78      230.60    263.26 o
   0   2  12        6.64      163.78    245.53 o
   1   2  12      134.49      173.26    247.85 o
   2   2  12        0.88        7.50    262.38 o
  -3   3  12       16.95      375.84    289.85 o
  -2   3  12     1209.51      738.79    300.49 o
  -1   3  12      730.65      611.35    269.54 o
   0   3  12      241.47      252.08    265.51 o
   1   3  12      284.16      357.56    282.76 o
   2   3  12      507.98      405.22    276.29 o
  -2   4  12     2926.05     2534.44    366.22 o
  -1   4  12      204.66      442.18    276.90 o
   0   4  12     2097.11     2062.87    335.40 o
   1   4  12     3540.66     4488.08    430.32 o
 


 
